# Supplementary material
Source: publisher site journal article supplement (https://www.dovepress.com/article/545553)
Supplement: Supplementary file 1 [file Supplementary%20Tables_1_1.docx]

**Supplementary Table 1** Details about 637 differentially expressed genes (DEGs) identified between glaucoma patients and non-glaucoma patients

| id | logFC | AveExpr | t | P.Value | adj.P.Val | B |
| --- | --- | --- | --- | --- | --- | --- |
| PLEC | -0.517742858 | 9.797229479 | -6.024384222 | 1.92E-08 | 0.000162649 | 8.976896166 |
| GPC1 | -0.795058344 | 8.751912718 | -5.539623002 | 1.82E-07 | 0.000444991 | 6.909202309 |
| NSA2 | 0.551763536 | 11.3384289 | 5.503994192 | 2.14E-07 | 0.000444991 | 6.761006521 |
| GAMT | -0.953855669 | 7.481936282 | -5.483160263 | 2.36E-07 | 0.000444991 | 6.674602118 |
| ATG14 | 0.370078919 | 8.932238615 | 5.459273035 | 2.62E-07 | 0.000444991 | 6.575766402 |
| TGFB1 | -0.384589808 | 7.687464496 | -5.274793732 | 5.98E-07 | 0.000845255 | 5.820989433 |
| HGS | -0.641572814 | 8.732231462 | -5.124073819 | 1.16E-06 | 0.001323071 | 5.21593211 |
| POLR1C | 0.449063944 | 9.024816291 | 5.076002477 | 1.43E-06 | 0.001323071 | 5.02522567 |
| GSTA4 | 0.435869089 | 9.622425957 | 5.045908923 | 1.63E-06 | 0.001323071 | 4.906411329 |
| CTNNAL1 | 0.364968961 | 11.47343821 | 5.031607857 | 1.73E-06 | 0.001323071 | 4.850103873 |
| FLNA | -0.515679789 | 11.20556123 | -5.011602374 | 1.88E-06 | 0.001323071 | 4.771505569 |
| CDO1 | 0.646740794 | 7.594248043 | 4.988386612 | 2.08E-06 | 0.001323071 | 4.680543093 |
| EIF4G1 | -0.560137064 | 8.809262154 | -4.984151681 | 2.12E-06 | 0.001323071 | 4.663978978 |
| TAF12 | 0.496635478 | 9.546802368 | 4.972098662 | 2.23E-06 | 0.001323071 | 4.616884909 |
| GALK1 | -0.787966236 | 5.979804632 | -4.960953633 | 2.34E-06 | 0.001323071 | 4.573403262 |
| SLC12A4 | -0.417805669 | 7.82276647 | -4.914570562 | 2.85E-06 | 0.001511186 | 4.393114212 |
| PHKG2 | -0.348738344 | 7.417232034 | -4.876872303 | 3.35E-06 | 0.001601862 | 4.247387202 |
| GPI | -0.640154358 | 9.806619966 | -4.872998122 | 3.40E-06 | 0.001601862 | 4.232452298 |
| CASP1 | 0.726606586 | 8.103282419 | 4.838249068 | 3.94E-06 | 0.001729876 | 4.098840813 |
| TTF1 | 0.7432249 | 8.762051231 | 4.81899689 | 4.27E-06 | 0.001729876 | 4.025084426 |
| PTRF | -0.551330778 | 10.7597367 | -4.818118412 | 4.29E-06 | 0.001729876 | 4.021723517 |
| TBL3 | -0.552228711 | 7.209471453 | -4.804928908 | 4.53E-06 | 0.001745113 | 3.971311036 |
| PACS2 | -0.359939581 | 8.086471769 | -4.782893995 | 4.97E-06 | 0.0017684 | 3.887292899 |
| MINK1 | -0.530010936 | 7.338087043 | -4.772680497 | 5.18E-06 | 0.0017684 | 3.848435752 |
| ALDOA | -1.033815364 | 9.502522248 | -4.771171869 | 5.22E-06 | 0.0017684 | 3.84270085 |
| SH3BP5 | 0.853106614 | 8.548950248 | 4.741151561 | 5.91E-06 | 0.001809917 | 3.728831595 |
| RABGGTA | -0.639032469 | 7.604447462 | -4.740340564 | 5.93E-06 | 0.001809917 | 3.725762049 |
| EFHD1 | -0.589841108 | 9.968481966 | -4.738365638 | 5.98E-06 | 0.001809917 | 3.718288597 |
| TAB2 | 0.451550717 | 10.2796521 | 4.664987068 | 8.10E-06 | 0.002350734 | 3.442090009 |
| RBP1 | 1.027595756 | 9.49003447 | 4.658385486 | 8.32E-06 | 0.002350734 | 3.417383614 |
| DLGAP4 | -0.761609108 | 7.423082017 | -4.637063972 | 9.08E-06 | 0.002482936 | 3.337749524 |
| PRRC2A | -0.272046469 | 9.243557701 | -4.625584132 | 9.52E-06 | 0.00252112 | 3.294975802 |
| RTN1 | -0.745070706 | 8.49661365 | -4.614550004 | 9.96E-06 | 0.002527562 | 3.253930678 |
| EIF3H | 0.375425025 | 10.75640906 | 4.610128638 | 1.01E-05 | 0.002527562 | 3.237502645 |
| UBA1 | -0.69103465 | 9.385330026 | -4.581275035 | 1.14E-05 | 0.002761732 | 3.130558041 |
| PRKAG1 | 0.415103608 | 9.235987692 | 4.561972406 | 1.23E-05 | 0.002904019 | 3.059270272 |
| PIP5K1C | -0.628504369 | 8.342463342 | -4.543994514 | 1.33E-05 | 0.003039027 | 2.993060949 |
| PIGH | 0.443644539 | 9.121042376 | 4.524082162 | 1.44E-05 | 0.003207003 | 2.919937681 |
| DZIP1 | 0.351647033 | 8.757714137 | 4.497680433 | 1.60E-05 | 0.003341394 | 2.823326372 |
| ZNF32 | 0.362529178 | 9.332512855 | 4.496257207 | 1.61E-05 | 0.003341394 | 2.81812953 |
| ATP6V0D1 | -0.392381631 | 10.56970986 | -4.489421163 | 1.65E-05 | 0.003341394 | 2.793183955 |
| CRIP2 | -0.836088786 | 9.030201598 | -4.489023388 | 1.66E-05 | 0.003341394 | 2.791733238 |
| ARAF | -0.433302886 | 9.132059752 | -4.467963325 | 1.80E-05 | 0.003551266 | 2.715053265 |
| MNAT1 | 0.537685814 | 9.482570222 | 4.458061804 | 1.87E-05 | 0.003551715 | 2.679088622 |
| SYNGR2 | -0.767369553 | 8.699990128 | -4.455298291 | 1.90E-05 | 0.003551715 | 2.669060845 |
| ZNF354A | 0.255473989 | 7.914568282 | 4.448503541 | 1.95E-05 | 0.003551715 | 2.644423683 |
| EIF3E | 0.465161594 | 12.42214944 | 4.445680904 | 1.97E-05 | 0.003551715 | 2.634196786 |
| RHOC | -0.873238714 | 8.896434915 | -4.413537995 | 2.24E-05 | 0.003952581 | 2.518058901 |
| WDR18 | -0.564872231 | 8.987037547 | -4.395370265 | 2.41E-05 | 0.004125813 | 2.452678193 |
| CD97 | -0.632034444 | 8.694942718 | -4.392433049 | 2.43E-05 | 0.004125813 | 2.442125825 |
| ILK | -0.444605797 | 10.43343515 | -4.381804561 | 2.54E-05 | 0.004217969 | 2.403983138 |
| P4HB | -0.410182211 | 10.74710844 | -4.37693523 | 2.59E-05 | 0.004217969 | 2.386530305 |
| BCR | -0.294786503 | 7.911688034 | -4.353409895 | 2.84E-05 | 0.004463126 | 2.302403856 |
| NMI | 0.486372256 | 10.36880609 | 4.353046072 | 2.84E-05 | 0.004463126 | 2.301105354 |
| STXBP2 | -0.748674742 | 5.740201718 | -4.345910677 | 2.92E-05 | 0.00450678 | 2.275654423 |
| VPS9D1 | -0.446338033 | 7.904902581 | -4.338525397 | 3.01E-05 | 0.004556704 | 2.249343498 |
| ARPC4 | -0.307988925 | 9.546009735 | -4.331736648 | 3.09E-05 | 0.004597726 | 2.225185923 |
| APEX1 | 0.277299381 | 11.10135287 | 4.312423734 | 3.33E-05 | 0.004783955 | 2.156609241 |
| NDUFS7 | -0.626791678 | 8.384263111 | -4.311490899 | 3.35E-05 | 0.004783955 | 2.153302461 |
| TGFB1I1 | -0.715250256 | 8.749719692 | -4.308514184 | 3.39E-05 | 0.004783955 | 2.142753811 |
| IGBP1 | 0.342668739 | 9.812577197 | 4.298685286 | 3.52E-05 | 0.004889834 | 2.10796001 |
| TXNRD1 | 0.420055122 | 11.8576995 | 4.292142541 | 3.61E-05 | 0.004935437 | 2.084830627 |
| SNRPE | 0.212136064 | 9.622061974 | 4.272489138 | 3.90E-05 | 0.005243649 | 2.015505808 |
| AKR1C3 | 1.128627436 | 10.25367879 | 4.2662116 | 3.99E-05 | 0.005289273 | 1.993410886 |
| DMPK | -0.421333903 | 9.314074735 | -4.259000622 | 4.11E-05 | 0.005349322 | 1.968059465 |
| ACP1 | 0.347038278 | 11.01836676 | 4.255283909 | 4.17E-05 | 0.005349322 | 1.955004818 |
| DCLK1 | 0.639234469 | 6.822876564 | 4.25150494 | 4.23E-05 | 0.005349322 | 1.941739945 |
| AES | -0.320874189 | 10.32769113 | -4.239694428 | 4.43E-05 | 0.005371567 | 1.900337825 |
| COX7C | 0.341797456 | 10.43198617 | 4.239617473 | 4.43E-05 | 0.005371567 | 1.90006833 |
| BLMH | 0.443173944 | 10.05870457 | 4.239128429 | 4.44E-05 | 0.005371567 | 1.898355791 |
| DAP3 | 0.436712236 | 10.38702312 | 4.22732873 | 4.64E-05 | 0.005401494 | 1.857078882 |
| RAD51C | 0.364551936 | 8.63143988 | 4.224191188 | 4.70E-05 | 0.005401494 | 1.84611739 |
| BMP1 | -0.344799806 | 8.801291274 | -4.224180613 | 4.70E-05 | 0.005401494 | 1.846080455 |
| GTF3C1 | -0.336554844 | 9.020890385 | -4.223317621 | 4.72E-05 | 0.005401494 | 1.8430665 |
| RAB22A | 0.242285167 | 9.73244988 | 4.219483475 | 4.79E-05 | 0.005408941 | 1.829681345 |
| SLC25A1 | -0.26717525 | 10.52175821 | -4.21107476 | 4.94E-05 | 0.005513706 | 1.800357121 |
| DOK4 | -0.62095935 | 6.127533786 | -4.200000801 | 5.16E-05 | 0.005679186 | 1.761803169 |
| NXPH4 | -0.401964533 | 6.592545812 | -4.186158697 | 5.44E-05 | 0.00583796 | 1.713715993 |
| UBE2M | -0.401413108 | 9.620644385 | -4.186154307 | 5.44E-05 | 0.00583796 | 1.713700763 |
| LIN37 | -0.240075919 | 8.391994761 | -4.175472698 | 5.67E-05 | 0.005984951 | 1.676672353 |
| NOL7 | 0.616310836 | 10.88303184 | 4.169750416 | 5.79E-05 | 0.005984951 | 1.656864196 |
| RHOG | -0.294344344 | 9.898139692 | -4.166171822 | 5.87E-05 | 0.005984951 | 1.644486699 |
| OSER1 | 0.245813969 | 9.144656487 | 4.164731935 | 5.91E-05 | 0.005984951 | 1.639508672 |
| NELFB | -0.518403447 | 8.813448462 | -4.162126334 | 5.97E-05 | 0.005984951 | 1.630503703 |
| CHST3 | -0.607019614 | 6.978347154 | -4.160557998 | 6.00E-05 | 0.005984951 | 1.62508552 |
| BDKRB2 | 0.523276342 | 8.443013256 | 4.156424765 | 6.10E-05 | 0.006009559 | 1.610813467 |
| PYGL | 0.482118008 | 10.00791024 | 4.151925701 | 6.20E-05 | 0.006019064 | 1.595290029 |
| LDB2 | 0.676196247 | 9.734978855 | 4.149991578 | 6.25E-05 | 0.006019064 | 1.58862038 |
| ITGB5 | -0.314781972 | 10.01148021 | -4.139094058 | 6.51E-05 | 0.006204009 | 1.551083944 |
| SCARB1 | -0.5701918 | 6.531753906 | -4.131041737 | 6.72E-05 | 0.006326125 | 1.523394416 |
| PSMA2 | 0.261042 | 9.460401769 | 4.124724471 | 6.88E-05 | 0.006408777 | 1.501699019 |
| ATG9A | -0.300165536 | 9.782524897 | -4.120163711 | 7.00E-05 | 0.006449954 | 1.486051209 |
| QSOX1 | -0.806191308 | 8.078649573 | -4.115049518 | 7.14E-05 | 0.00647745 | 1.468519776 |
| IFIT1 | 0.505099619 | 9.567186376 | 4.111574946 | 7.23E-05 | 0.00647745 | 1.45661813 |
| USP11 | -0.670621708 | 8.657733171 | -4.110590688 | 7.26E-05 | 0.00647745 | 1.453248046 |
| DDX49 | -0.47044065 | 8.249083538 | -4.09733038 | 7.63E-05 | 0.006702506 | 1.407903099 |
| C6orf106 | -0.403533747 | 7.501264726 | -4.093922422 | 7.73E-05 | 0.006702506 | 1.396266755 |
| HADHB | 0.364539192 | 10.41867626 | 4.093367154 | 7.75E-05 | 0.006702506 | 1.394371494 |
| PSME1 | 0.365154011 | 11.36781491 | 4.087048158 | 7.94E-05 | 0.006743722 | 1.372816672 |
| ERH | 0.2126837 | 11.11864681 | 4.083146928 | 8.05E-05 | 0.006743722 | 1.359521454 |
| PVRL2 | -0.634934269 | 7.56039847 | -4.082100091 | 8.09E-05 | 0.006743722 | 1.35595548 |
| OGT | 0.260092928 | 9.195213547 | 4.080094521 | 8.15E-05 | 0.006743722 | 1.349125553 |
| ATP5H | 0.272111056 | 11.85939326 | 4.078340649 | 8.20E-05 | 0.006743722 | 1.343154816 |
| EIF3M | 0.209521319 | 10.24130591 | 4.074504273 | 8.32E-05 | 0.006743722 | 1.330101223 |
| INTS1 | -0.240642853 | 8.425082043 | -4.072496537 | 8.38E-05 | 0.006743722 | 1.323273368 |
| SMAD1 | 0.522890592 | 9.123358308 | 4.070962051 | 8.43E-05 | 0.006743722 | 1.318056615 |
| ELN | -0.568099528 | 9.034101598 | -4.065821239 | 8.60E-05 | 0.006811352 | 1.300590178 |
| ABCA8 | 0.820078806 | 7.517095231 | 4.043308272 | 9.36E-05 | 0.007344238 | 1.224293644 |
| LITAF | 0.363404875 | 10.72257756 | 4.039276395 | 9.50E-05 | 0.007387745 | 1.210662953 |
| ACO1 | 0.566423797 | 8.816897487 | 4.025479818 | 0.000100032 | 0.007708807 | 1.164097315 |
| DGCR2 | -0.478791106 | 7.820019325 | -4.02244922 | 0.000101172 | 0.007726443 | 1.153884529 |
| ABCF1 | -0.3757439 | 8.588959282 | -4.005776286 | 0.000107671 | 0.008149346 | 1.097801613 |
| IL1RN | 0.325419508 | 5.964923308 | 3.998438698 | 0.000110656 | 0.008301142 | 1.073175474 |
| EIF4A3 | 0.293425911 | 10.91572401 | 3.982961983 | 0.000117213 | 0.008715894 | 1.021344399 |
| ATG5 | 0.483186475 | 9.135809077 | 3.970938347 | 0.000122561 | 0.009034345 | 0.981182063 |
| CASK | 0.455559669 | 9.027282188 | 3.967904093 | 0.000123947 | 0.009057753 | 0.971061269 |
| RBMX2 | 0.390230019 | 8.711813983 | 3.962605799 | 0.000126403 | 0.009140266 | 0.953402732 |
| NAMPT | 0.335380483 | 7.37497541 | 3.95944567 | 0.00012789 | 0.009140266 | 0.942878909 |
| R3HDM1 | 0.30065935 | 8.298954128 | 3.954832915 | 0.000130091 | 0.009140266 | 0.927528958 |
| MRPL3 | 0.281649414 | 10.86250557 | 3.954026263 | 0.000130479 | 0.009140266 | 0.924846037 |
| FTO | 0.239334583 | 11.11173951 | 3.948860281 | 0.000132994 | 0.009140266 | 0.907673814 |
| OSGEP | 0.378550867 | 8.773527043 | 3.948716898 | 0.000133064 | 0.009140266 | 0.907197434 |
| TXNL1 | 0.338333444 | 11.0267548 | 3.948056043 | 0.00013339 | 0.009140266 | 0.905001974 |
| PMS1 | 0.380611767 | 8.798940308 | 3.947178761 | 0.000133822 | 0.009140266 | 0.902087942 |
| RHOD | -0.344003589 | 9.950200538 | -3.94524646 | 0.00013478 | 0.009140266 | 0.895671221 |
| PDGFA | -0.582005061 | 7.139965094 | -3.93730142 | 0.000138789 | 0.009316491 | 0.8693126 |
| WWP2 | -0.334625728 | 7.622280103 | -3.935260998 | 0.000139836 | 0.009316491 | 0.862549755 |
| CDK18 | -0.292058469 | 6.249366889 | -3.932512135 | 0.00014126 | 0.009316491 | 0.853443027 |
| SLC13A3 | 0.456416606 | 7.397477598 | 3.931522991 | 0.000141775 | 0.009316491 | 0.850167267 |
| AP2M1 | -0.366355856 | 11.32502285 | -3.91652206 | 0.000149816 | 0.009717772 | 0.800565192 |
| UBC | -0.325206539 | 11.73085137 | -3.914347043 | 0.000151018 | 0.009717772 | 0.793385241 |
| PPP4R1 | -0.375723953 | 9.22723894 | -3.910886305 | 0.000152948 | 0.009717772 | 0.781967247 |
| HMG20B | -0.329634269 | 8.146082547 | -3.910685709 | 0.000153061 | 0.009717772 | 0.781305656 |
| CSPG4 | -0.484717372 | 7.693364214 | -3.90797727 | 0.000154589 | 0.009717772 | 0.772375429 |
| PSMA1 | 0.220917433 | 9.958613744 | 3.90767687 | 0.00015476 | 0.009717772 | 0.771385242 |
| UBE2I | 0.227925325 | 9.869885017 | 3.903297814 | 0.000157264 | 0.009784679 | 0.756957486 |
| SLC4A2 | -0.389918033 | 9.555686581 | -3.90179301 | 0.000158134 | 0.009784679 | 0.752002426 |
| EIF6 | -0.603080369 | 9.17868647 | -3.897752645 | 0.000160491 | 0.009851698 | 0.738705397 |
| SUPT4H1 | 0.173156989 | 9.191519897 | 3.895971046 | 0.000161541 | 0.009851698 | 0.732845408 |
| FAM89B | -0.515676253 | 8.548702966 | -3.887701524 | 0.000166502 | 0.010081681 | 0.70567227 |
| WDTC1 | -0.541640125 | 7.808719333 | -3.882920286 | 0.000169436 | 0.010132451 | 0.689981527 |
| PSMA5 | 0.390975747 | 9.018577829 | 3.882026687 | 0.000169989 | 0.010132451 | 0.687050607 |
| UQCRFS1 | 0.275772581 | 10.25422975 | 3.880521336 | 0.000170926 | 0.010132451 | 0.682114368 |
| CETN3 | 0.233224272 | 8.95106006 | 3.874601644 | 0.000174658 | 0.010281759 | 0.662717131 |
| NR1H2 | -0.258723061 | 9.068032214 | -3.867251116 | 0.000179399 | 0.010461206 | 0.638662958 |
| SDHD | 0.279555353 | 9.13440747 | 3.864458377 | 0.000181233 | 0.010461206 | 0.629533045 |
| PPP1CA | -0.476782628 | 9.12724465 | -3.86419251 | 0.000181408 | 0.010461206 | 0.628664146 |
| GABARAPL2 | 0.326000897 | 10.9563972 | 3.859731999 | 0.000184376 | 0.010492194 | 0.614093272 |
| ERCC8 | 0.349361669 | 8.889967248 | 3.859665308 | 0.000184421 | 0.010492194 | 0.613875514 |
| GTF2E2 | 0.387602522 | 10.83319906 | 3.856399489 | 0.000186624 | 0.010546739 | 0.603215584 |
| PPP2R1A | -0.569471158 | 8.994023145 | -3.849580093 | 0.000191305 | 0.010560139 | 0.580978765 |
| CST3 | -0.504453756 | 9.25317288 | -3.849449198 | 0.000191396 | 0.010560139 | 0.580552236 |
| MFSD10 | -0.344728956 | 9.488408274 | -3.847673303 | 0.000192633 | 0.010560139 | 0.574766472 |
| ACTR1A | -0.47479115 | 8.530367436 | -3.847050276 | 0.00019307 | 0.010560139 | 0.572737173 |
| AUH | 0.251962769 | 8.921062744 | 3.845516727 | 0.000194147 | 0.010560139 | 0.567743225 |
| SMPDL3A | 0.492891911 | 8.815368034 | 3.845248996 | 0.000194335 | 0.010560139 | 0.566871526 |
| COX4I1 | 0.324550342 | 10.97457151 | 3.84175019 | 0.000196817 | 0.010623741 | 0.55548413 |
| EAPP | 0.442104094 | 9.990714231 | 3.840079818 | 0.000198012 | 0.010623741 | 0.550050455 |
| CDK2AP2 | -0.239599789 | 9.595906624 | -3.834935923 | 0.000201737 | 0.010695862 | 0.533328923 |
| RNF114 | 0.436331703 | 10.50054421 | 3.832114454 | 0.000203808 | 0.010695862 | 0.524164347 |
| RHBDF1 | -0.435386581 | 8.142599581 | -3.830084561 | 0.000205311 | 0.010695862 | 0.517574141 |
| SMPDL3B | -0.496882989 | 6.369996214 | -3.82965188 | 0.000205632 | 0.010695862 | 0.516169755 |
| PSMC2 | 0.330250317 | 9.826438658 | 3.827528997 | 0.000207217 | 0.010695862 | 0.509281126 |
| FBLN5 | 0.450998903 | 10.52967744 | 3.826370355 | 0.000208087 | 0.010695862 | 0.505522641 |
| SDHC | 0.205726411 | 9.874207376 | 3.826235445 | 0.000208189 | 0.010695862 | 0.50508507 |
| PROS1 | 0.495835203 | 8.484318111 | 3.820984999 | 0.000212177 | 0.01081779 | 0.488064748 |
| SPOCK1 | 0.541108853 | 11.86619825 | 3.81889291 | 0.000213786 | 0.01081779 | 0.48128786 |
| U2AF1 | 0.301231203 | 11.27518086 | 3.817614757 | 0.000214775 | 0.01081779 | 0.477148959 |
| ATP6V0C | -0.576466161 | 9.597399162 | -3.816466795 | 0.000215667 | 0.01081779 | 0.473432547 |
| CYB5A | 0.253989086 | 9.154165957 | 3.799138938 | 0.000229563 | 0.011447103 | 0.417440176 |
| TPM4 | -0.625218711 | 9.601130376 | -3.795919959 | 0.000232237 | 0.011512697 | 0.407060207 |
| RAD9A | -0.339996272 | 6.373951009 | -3.792526261 | 0.000235087 | 0.011573534 | 0.396124209 |
| NACA | 0.302912972 | 11.07109557 | 3.790823943 | 0.00023653 | 0.011573534 | 0.390641434 |
| ANAPC5 | -0.563655714 | 8.752833744 | -3.78930219 | 0.000237826 | 0.011573534 | 0.385741828 |
| PNPLA6 | -0.350869081 | 9.176249479 | -3.787507844 | 0.000239364 | 0.011573534 | 0.37996651 |
| CYB5R1 | -0.698253742 | 8.012888077 | -3.784540165 | 0.000241927 | 0.011573534 | 0.370419328 |
| FARSA | -0.259685353 | 8.739740726 | -3.782576783 | 0.000243638 | 0.011573534 | 0.364106207 |
| GNB1 | -0.377398542 | 10.32112048 | -3.781199897 | 0.000244844 | 0.011573534 | 0.359680439 |
| CENPB | -0.274684461 | 9.631881103 | -3.776076397 | 0.000249383 | 0.011573534 | 0.34322278 |
| COPE | -0.654525522 | 7.421006915 | -3.775927204 | 0.000249516 | 0.011573534 | 0.3427438 |
| HSPE1 | 0.249765719 | 10.4209352 | 3.775224377 | 0.000250145 | 0.011573534 | 0.340487604 |
| ACOX2 | 0.6087667 | 9.453034427 | 3.775086145 | 0.000250269 | 0.011573534 | 0.340043894 |
| IK | 0.326958964 | 9.889450239 | 3.7730859 | 0.000252069 | 0.011573534 | 0.333624728 |
| NCOA4 | 0.235403383 | 11.13908062 | 3.772666004 | 0.000252448 | 0.011573534 | 0.332277536 |
| MYH10 | 0.310694858 | 9.206638231 | 3.772135221 | 0.000252928 | 0.011573534 | 0.330574743 |
| UBE2V2 | 0.406508244 | 10.05405588 | 3.770556 | 0.000254362 | 0.011573534 | 0.325509576 |
| SMTN | -0.43962115 | 8.780102915 | -3.769518599 | 0.000255309 | 0.011573534 | 0.32218313 |
| RRAS | -0.368711794 | 10.41586574 | -3.760854476 | 0.000263343 | 0.011874249 | 0.294429206 |
| SNRPB2 | 0.277509939 | 9.394103675 | 3.755891983 | 0.000268052 | 0.012020668 | 0.278555122 |
| EIF4B | 0.382327206 | 10.46758868 | 3.753458448 | 0.000270391 | 0.012020668 | 0.270776657 |
| PPP2R5D | -0.568560197 | 7.507980265 | -3.752988836 | 0.000270844 | 0.012020668 | 0.269276056 |
| DNAJC11 | -0.311328722 | 9.122275128 | -3.749919534 | 0.000273826 | 0.012081281 | 0.259471994 |
| IL15 | 0.490322433 | 8.351038051 | 3.748658283 | 0.00027506 | 0.012081281 | 0.255445075 |
| AMIGO2 | -0.73451135 | 7.154268607 | -3.73878724 | 0.000284904 | 0.012449151 | 0.223965268 |
| KIF25 | -0.261242742 | 6.528246675 | -3.731198664 | 0.000292699 | 0.012663548 | 0.199808477 |
| RPN1 | -0.447168647 | 8.471673128 | -3.731102341 | 0.000292799 | 0.012663548 | 0.199502099 |
| ATP5G3 | 0.254953483 | 10.50159495 | 3.717852018 | 0.0003069 | 0.01307348 | 0.15741491 |
| CD81 | -0.341147364 | 11.56135235 | -3.716849851 | 0.000307992 | 0.01307348 | 0.154236473 |
| ABI2 | 0.465912758 | 9.368806145 | 3.716484793 | 0.000308391 | 0.01307348 | 0.153078834 |
| ZNF217 | -0.291910761 | 8.139918325 | -3.716434263 | 0.000308446 | 0.01307348 | 0.152918604 |
| PMPCB | 0.431103414 | 7.281116325 | 3.711186771 | 0.000314234 | 0.013252534 | 0.13628823 |
| IL33 | 0.403347231 | 4.781952786 | 3.707067916 | 0.000318849 | 0.013380594 | 0.123247615 |
| TUBB4B | -0.314257614 | 11.40669626 | -3.703751992 | 0.000322611 | 0.013471771 | 0.112757375 |
| IGJ | 0.554952344 | 5.938857709 | 3.702099295 | 0.000324501 | 0.013484297 | 0.107531657 |
| GTF2B | 0.340685361 | 9.247846137 | 3.699154326 | 0.000327896 | 0.013558908 | 0.098224391 |
| SALL2 | 0.446321094 | 9.427868265 | 3.692753457 | 0.000335392 | 0.01380153 | 0.078015133 |
| AP3D1 | -0.302321258 | 9.185376829 | -3.688656149 | 0.000340275 | 0.013934819 | 0.065093241 |
| FUT8 | 0.386669417 | 8.475402923 | 3.682469155 | 0.000347776 | 0.014075614 | 0.045602335 |
| DNAJC2 | 0.536000064 | 9.068356718 | 3.681701082 | 0.000348718 | 0.014075614 | 0.043184468 |
| KRT14 | -0.678091258 | 9.278627017 | -3.681072425 | 0.00034949 | 0.014075614 | 0.041205769 |
| GYG2 | 0.316400344 | 6.205010162 | 3.680371227 | 0.000350354 | 0.014075614 | 0.038999059 |
| NBN | 0.259241369 | 9.764300538 | 3.678725744 | 0.00035239 | 0.014090605 | 0.033821933 |
| CEMIP | 0.501324839 | 11.17164627 | 3.675793435 | 0.000356045 | 0.014169908 | 0.02460062 |
| ETF1 | 0.367739303 | 11.98609696 | 3.672474559 | 0.000360225 | 0.014269272 | 0.014170632 |
| TUBGCP2 | -0.289917031 | 8.580424547 | -3.668396879 | 0.000365424 | 0.014383425 | 0.001366152 |
| ZNF516 | 0.407520869 | 6.989286282 | 3.667559831 | 0.0003665 | 0.014383425 | -0.00126091 |
| ESD | 0.387687589 | 12.27765367 | 3.665829829 | 0.000368733 | 0.014404391 | -0.006689 |
| ACAA2 | 0.282132269 | 9.385130231 | 3.65773195 | 0.00037936 | 0.014659385 | -0.032070262 |
| PKN1 | -0.285975478 | 9.324390154 | -3.657298913 | 0.000379937 | 0.014659385 | -0.033426288 |
| PNISR | 0.416389989 | 8.401096274 | 3.656914561 | 0.000380449 | 0.014659385 | -0.034629755 |
| SLC16A2 | 0.453612333 | 9.347538726 | 3.653963772 | 0.000384403 | 0.014672683 | -0.043865824 |
| ITGA5 | -0.301551681 | 9.659678043 | -3.653184136 | 0.000385455 | 0.014672683 | -0.046305129 |
| RP2 | -0.606162861 | 6.965491521 | -3.652790498 | 0.000385987 | 0.014672683 | -0.047536577 |
| RASSF1 | -0.576068808 | 7.766250282 | -3.640872446 | 0.000402422 | 0.015229152 | -0.084771177 |
| HS6ST1 | -0.422136494 | 5.907167504 | -3.638739784 | 0.000405432 | 0.015274868 | -0.091423947 |
| PGRMC1 | 0.255563147 | 11.46692628 | 3.630763583 | 0.000416879 | 0.015636647 | -0.116278143 |
| CRIP1 | -0.749209753 | 8.146942222 | -3.619681725 | 0.000433291 | 0.016180658 | -0.150738092 |
| UBE2S | -0.382617486 | 9.572295359 | -3.611375401 | 0.000445991 | 0.016576966 | -0.176512588 |
| ATP8B1 | -0.277720219 | 8.428863128 | -3.610201266 | 0.000447815 | 0.016576966 | -0.180152142 |
| KRT16 | -0.445051608 | 6.255246068 | -3.606989835 | 0.000452838 | 0.016690029 | -0.190102052 |
| TRAPPC3 | 0.195913781 | 9.64403494 | 3.591179882 | 0.000478353 | 0.017554102 | -0.238983219 |
| VAMP2 | -0.652617489 | 7.737005274 | -3.584562346 | 0.000489431 | 0.017883209 | -0.259392637 |
| BCAP31 | -0.581420867 | 9.012548145 | -3.580168188 | 0.00049692 | 0.018078929 | -0.272928297 |
| SLC2A1 | -0.350785047 | 8.112976188 | -3.576095107 | 0.000503958 | 0.018256649 | -0.285463113 |
| PLOD1 | -0.323869506 | 10.56343133 | -3.574530654 | 0.000506687 | 0.018275982 | -0.290274665 |
| CNOT2 | 0.274883447 | 8.760923111 | 3.572218122 | 0.000510745 | 0.018275982 | -0.297383895 |
| BANF1 | -0.31809095 | 10.98423652 | -3.572096342 | 0.00051096 | 0.018275982 | -0.29775817 |
| ATP5S | 0.365404786 | 8.881446761 | 3.56694127 | 0.000520122 | 0.01848208 | -0.313592364 |
| RAP1GDS1 | -0.351722386 | 8.743674701 | -3.565928009 | 0.000521941 | 0.01848208 | -0.316702528 |
| LYRM1 | 0.248528744 | 9.286532701 | 3.565029076 | 0.000523559 | 0.01848208 | -0.319461178 |
| PLA2G15 | -0.535789878 | 6.914741915 | -3.563429549 | 0.000526451 | 0.01848208 | -0.32436844 |
| MOXD1 | 0.612861294 | 9.107818744 | 3.561271141 | 0.000530378 | 0.01848208 | -0.330987534 |
| B4GALT2 | -0.472881125 | 8.289852991 | -3.560511266 | 0.000531766 | 0.01848208 | -0.333317049 |
| AGPAT2 | -0.533794061 | 7.491614675 | -3.558850449 | 0.000534814 | 0.01848208 | -0.338407157 |
| CKAP4 | -0.531545794 | 9.775815282 | -3.555323509 | 0.00054134 | 0.01848208 | -0.34921031 |
| CCDC28A | 0.250837481 | 8.940690718 | 3.554863465 | 0.000542197 | 0.01848208 | -0.350618814 |
| SNW1 | 0.213913758 | 9.187002009 | 3.554648566 | 0.000542598 | 0.01848208 | -0.351276712 |
| MCRS1 | -0.564621331 | 7.390606991 | -3.554090884 | 0.000543639 | 0.01848208 | -0.352983873 |
| EPHA2 | -0.736061722 | 7.069989393 | -3.552477387 | 0.000546662 | 0.01848208 | -0.357921857 |
| ME1 | 0.332589183 | 9.829208556 | 3.552221132 | 0.000547143 | 0.01848208 | -0.358705941 |
| UBE4A | 0.331586397 | 10.98303608 | 3.55216662 | 0.000547246 | 0.01848208 | -0.358872731 |
| SFXN3 | -0.481263203 | 8.467706726 | -3.546443007 | 0.000558108 | 0.018774121 | -0.376373737 |
| ATG13 | -0.263763144 | 8.507242026 | -3.537516355 | 0.000575455 | 0.019281147 | -0.403623579 |
| PRPS1 | 0.366797617 | 10.77000315 | 3.533008684 | 0.000584406 | 0.019503991 | -0.417362984 |
| CLN3 | -0.582269647 | 7.17498765 | -3.527761863 | 0.000594991 | 0.019779378 | -0.433337649 |
| P4HA1 | -0.55080915 | 9.648024632 | -3.523941115 | 0.000602813 | 0.019879177 | -0.444958469 |
| VCP | -0.402448669 | 9.314614342 | -3.523846847 | 0.000603007 | 0.019879177 | -0.445245056 |
| TPD52L2 | -0.245287186 | 10.96640243 | -3.52286708 | 0.000605029 | 0.019879177 | -0.448223332 |
| RTCB | 0.195810078 | 10.50977385 | 3.520703946 | 0.000609515 | 0.019949262 | -0.454796429 |
| DFNA5 | 0.337370117 | 10.69505715 | 3.518198712 | 0.00061475 | 0.020032508 | -0.462405013 |
| LY96 | 0.674589136 | 8.093487068 | 3.517142618 | 0.00061697 | 0.020032508 | -0.465611149 |
| VASP | -0.420738203 | 8.582914239 | -3.516109642 | 0.000619148 | 0.020032508 | -0.468746355 |
| HYAL2 | -0.331450958 | 8.445627821 | -3.508592764 | 0.000635219 | 0.02040041 | -0.491538708 |
| PPL | 0.623315336 | 8.885945043 | 3.508540404 | 0.000635332 | 0.02040041 | -0.491697335 |
| NAT2 | 0.4248517 | 5.939090778 | 3.506669094 | 0.000639394 | 0.020453368 | -0.49736528 |
| MGRN1 | -0.564230231 | 7.705110915 | -3.504228252 | 0.000644729 | 0.020546498 | -0.504754611 |
| PRKRA | 0.312359519 | 9.099844513 | 3.502513959 | 0.000648501 | 0.020589305 | -0.509941938 |
| ITGA4 | -0.494887958 | 5.966242325 | -3.495542696 | 0.000664056 | 0.021004477 | -0.531015445 |
| XPNPEP1 | 0.294194386 | 10.78846248 | 3.494131884 | 0.000667246 | 0.021026929 | -0.535276092 |
| DNAJA1 | 0.216620758 | 10.59351138 | 3.491786702 | 0.000672581 | 0.021069784 | -0.542355475 |
| PTOV1 | -0.600066489 | 7.818317641 | -3.491170211 | 0.00067399 | 0.021069784 | -0.544215835 |
| ACOT13 | 0.4236983 | 8.326117051 | 3.488846072 | 0.000679328 | 0.021069784 | -0.551226921 |
| MTUS1 | 0.412335086 | 7.012416709 | 3.488606888 | 0.000679879 | 0.021069784 | -0.551948241 |
| GNLY | -0.286630808 | 6.163529034 | -3.487948628 | 0.000681399 | 0.021069784 | -0.553933179 |
| GYPC | 0.306295892 | 9.600619821 | 3.487032945 | 0.000683519 | 0.021069784 | -0.556693858 |
| GCH1 | 0.513314225 | 8.21309359 | 3.485851953 | 0.000686262 | 0.021077698 | -0.560253551 |
| FASTK | -0.231383619 | 9.826548231 | -3.483260046 | 0.000692319 | 0.021186961 | -0.568062558 |
| CDIPT | -0.571163244 | 8.73333294 | -3.471594274 | 0.000720208 | 0.021821247 | -0.603151692 |
| SPTAN1 | -0.442633608 | 8.124896179 | -3.469656609 | 0.000724941 | 0.021821247 | -0.608970741 |
| SRSF4 | 0.204789508 | 10.04627815 | 3.469364922 | 0.000725656 | 0.021821247 | -0.609846485 |
| LOC730101 | 0.565119617 | 9.612719615 | 3.469224466 | 0.000726001 | 0.021821247 | -0.610268163 |
| CETN2 | 0.274621922 | 11.29892987 | 3.467248735 | 0.000730864 | 0.021821247 | -0.61619823 |
| UVRAG | 0.195203114 | 8.167042718 | 3.467038771 | 0.000731383 | 0.021821247 | -0.616828267 |
| RHOBTB2 | -0.433559353 | 6.329704889 | -3.46659392 | 0.000732482 | 0.021821247 | -0.618163026 |
| TMEM5 | 0.214358194 | 9.345133709 | 3.466126977 | 0.000733639 | 0.021821247 | -0.619563922 |
| GPR125 | 0.441605122 | 8.179077068 | 3.464678377 | 0.000737237 | 0.02185159 | -0.62390896 |
| AKAP1 | 0.578992369 | 9.919526137 | 3.462160527 | 0.00074353 | 0.021932663 | -0.631457695 |
| OMD | 0.542344133 | 6.433101231 | 3.461516916 | 0.000745147 | 0.021932663 | -0.633386586 |
| STAT1 | -0.397901203 | 9.81599359 | -3.460319193 | 0.000748164 | 0.02194528 | -0.636975368 |
| NME5 | 0.365152694 | 8.232269316 | 3.457876196 | 0.000754354 | 0.022050557 | -0.644292299 |
| DIAPH2 | 0.279999953 | 7.916134359 | 3.455400438 | 0.000760677 | 0.02215896 | -0.651703089 |
| FAM208A | 0.251025664 | 9.165680846 | 3.454294557 | 0.000763517 | 0.022165527 | -0.655011982 |
| HR | 0.310602944 | 7.288478949 | 3.449391948 | 0.000776229 | 0.02245765 | -0.669670699 |
| ST13 | 0.474711728 | 11.76919324 | 3.445472515 | 0.000786534 | 0.022547175 | -0.681377615 |
| PLOD3 | -0.328999311 | 10.24356303 | -3.445256098 | 0.000787107 | 0.022547175 | -0.682023716 |
| SEC11A | 0.394013881 | 9.755356453 | 3.445182198 | 0.000787303 | 0.022547175 | -0.68224433 |
| FAM20B | 0.317764997 | 10.33456671 | 3.443340908 | 0.000792193 | 0.022610159 | -0.687739968 |
| LSM6 | 0.352841739 | 8.516662111 | 3.442349892 | 0.000794836 | 0.022610159 | -0.690696834 |
| COX8A | -0.408423703 | 10.40166653 | -3.435991051 | 0.000811998 | 0.022976058 | -0.709653115 |
| HRSP12 | 0.578651069 | 7.870888256 | 3.435579734 | 0.00081312 | 0.022976058 | -0.710878311 |
| SMARCA2 | 0.391992047 | 10.02189221 | 3.43288256 | 0.000820513 | 0.023051622 | -0.718909472 |
| C1QB | -0.424640314 | 4.965114316 | -3.432621362 | 0.000821233 | 0.023051622 | -0.719686948 |
| HARS2 | 0.346757894 | 7.500165171 | 3.428515754 | 0.000832618 | 0.023237732 | -0.731901313 |
| BAG6 | -0.352476944 | 9.654195667 | -3.427785599 | 0.000834658 | 0.023237732 | -0.734072314 |
| RNF44 | 0.310016061 | 9.873319974 | 3.427275202 | 0.000836087 | 0.023237732 | -0.735589676 |
| MYH11 | -0.594272658 | 7.597957496 | -3.426041826 | 0.000839549 | 0.023257713 | -0.73925563 |
| MXRA8 | -0.571902039 | 9.598894094 | -3.420924018 | 0.000854061 | 0.023582664 | -0.754455808 |
| NTRK2 | 0.621609956 | 8.125396308 | 3.419789457 | 0.00085731 | 0.023595515 | -0.757823017 |
| RUNX1T1 | 0.437675756 | 8.134096829 | 3.412547149 | 0.000878324 | 0.024095638 | -0.779295737 |
| LSM12 | -0.343135575 | 8.565232376 | -3.410247672 | 0.000885096 | 0.024127881 | -0.786105716 |
| FGF12 | 0.374284939 | 6.776097162 | 3.410215402 | 0.000885192 | 0.024127881 | -0.786201259 |
| PIAS4 | -0.200553528 | 7.218911778 | -3.408359131 | 0.000890695 | 0.02413082 | -0.791695902 |
| EXTL3 | -0.212514711 | 8.693412017 | -3.4073087 | 0.000893824 | 0.02413082 | -0.794804144 |
| IFITM1 | 0.610955717 | 9.783578718 | 3.407303408 | 0.00089384 | 0.02413082 | -0.794819804 |
| CA12 | 0.364525061 | 9.163821197 | 3.402289275 | 0.000908916 | 0.024414667 | -0.809645946 |
| DYNC2LI1 | 0.324177094 | 8.869905359 | 3.401577833 | 0.000911074 | 0.024414667 | -0.811748149 |
| HOXA11 | -0.157755875 | 6.767188872 | -3.400026587 | 0.000915797 | 0.024414667 | -0.816330602 |
| VEGFB | -0.560121336 | 7.202317009 | -3.400001424 | 0.000915874 | 0.024414667 | -0.816404923 |
| SLC25A11 | -0.480602536 | 6.947729607 | -3.398350298 | 0.000920927 | 0.024472399 | -0.821280526 |
| FADS3 | -0.563877664 | 9.018477017 | -3.396040464 | 0.000928039 | 0.02458433 | -0.82809799 |
| TRIM28 | -0.677297311 | 8.22568459 | -3.394622348 | 0.000932431 | 0.024623728 | -0.832281683 |
| HDAC1 | 0.259373314 | 9.51956312 | 3.391782071 | 0.000941286 | 0.024780381 | -0.840656718 |
| CACTIN | -0.232800178 | 7.289483359 | -3.390641591 | 0.000944864 | 0.024797561 | -0.844018006 |
| CSTA | 0.465661908 | 6.395302248 | 3.389140255 | 0.000949593 | 0.024844764 | -0.848441427 |
| CBX3 | 0.172918108 | 10.51767215 | 3.386388794 | 0.000958319 | 0.024995896 | -0.85654397 |
| MAP3K3 | -0.242320539 | 6.519496376 | -3.384659786 | 0.00096384 | 0.025004132 | -0.861632834 |
| CCNG2 | 0.318955928 | 9.17339494 | 3.38444317 | 0.000964534 | 0.025004132 | -0.862270235 |
| RPP40 | 0.262027844 | 9.823986385 | 3.382479315 | 0.000970845 | 0.02509102 | -0.868047432 |
| ITGA6 | -0.358546769 | 7.89651241 | -3.378106058 | 0.00098504 | 0.025380492 | -0.880902687 |
| ADAM10 | 0.177016381 | 9.213857932 | 3.371376309 | 0.001007263 | 0.025833906 | -0.900658351 |
| LRRC15 | -0.502635408 | 6.081000009 | -3.370644556 | 0.001009708 | 0.025833906 | -0.902804524 |
| WDR62 | -0.294308492 | 7.929965829 | -3.37002574 | 0.00101178 | 0.025833906 | -0.904619167 |
| C5 | 0.602208739 | 9.051459496 | 3.3678302 | 0.001019162 | 0.025944254 | -0.911055259 |
| STAC | -0.561885694 | 7.053055479 | -3.359434183 | 0.001047861 | 0.026299569 | -0.935636036 |
| EMC2 | 0.205994283 | 9.349612043 | 3.359318136 | 0.001048263 | 0.026299569 | -0.935975431 |
| RHOB | -0.709858919 | 8.517236658 | -3.358631157 | 0.001050645 | 0.026299569 | -0.937984401 |
| KIAA0020 | 0.235751711 | 9.496775624 | 3.358573377 | 0.001050846 | 0.026299569 | -0.938153354 |
| OXA1L | 0.157626589 | 9.639934111 | 3.357793953 | 0.001053555 | 0.026299569 | -0.940432227 |
| LPCAT4 | -0.504026111 | 6.669527803 | -3.357063369 | 0.001056101 | 0.026299569 | -0.942567911 |
| NCK1 | 0.176482417 | 8.667604547 | 3.356086377 | 0.001059514 | 0.026299569 | -0.945423311 |
| ADH5 | 0.292792314 | 10.87245369 | 3.355686336 | 0.001060915 | 0.026299569 | -0.94659229 |
| NQO2 | 0.314350892 | 10.53524479 | 3.355650053 | 0.001061042 | 0.026299569 | -0.94669831 |
| DHX38 | -0.484156431 | 7.109914197 | -3.353364018 | 0.00106908 | 0.026358835 | -0.953376207 |
| PIK3C2B | 0.474460161 | 8.889279316 | 3.352541788 | 0.001071985 | 0.026358835 | -0.95577717 |
| FNBP4 | 0.202212364 | 8.912078778 | 3.352322289 | 0.001072761 | 0.026358835 | -0.956418038 |
| ZNF75D | 0.436511797 | 7.422170889 | 3.346806073 | 0.001092455 | 0.026729418 | -0.972512391 |
| DDB1 | 0.391193328 | 12.61855189 | 3.346335777 | 0.00109415 | 0.026729418 | -0.97388354 |
| MAPK7 | -0.241553964 | 8.249948171 | -3.345221225 | 0.001098176 | 0.026750677 | -0.977132395 |
| MEF2D | -0.390979694 | 7.323104889 | -3.342664124 | 0.001107465 | 0.026899652 | -0.98458284 |
| AOX1 | 0.348481497 | 9.893163581 | 3.341680153 | 0.001111059 | 0.026900884 | -0.987448522 |
| CD58 | 0.282284978 | 8.008714812 | 3.340914651 | 0.001113862 | 0.026900884 | -0.989677464 |
| TBCC | 0.201047989 | 9.608592205 | 3.339983682 | 0.001117281 | 0.026906786 | -0.992387638 |
| NDUFB5 | 0.317251297 | 9.639070744 | 3.335101658 | 0.001135369 | 0.027250223 | -1.006589716 |
| MFAP1 | 0.1950051 | 10.31405546 | 3.334405306 | 0.001137971 | 0.027250223 | -1.008614052 |
| GNRH2 | -0.248830311 | 6.949642923 | -3.333155656 | 0.001142655 | 0.027285307 | -1.01224599 |
| WDR13 | -0.420989819 | 7.781501214 | -3.328027568 | 0.001162065 | 0.027646946 | -1.027138371 |
| MED6 | 0.203606711 | 7.848897718 | 3.327436432 | 0.001164322 | 0.027646946 | -1.028853868 |
| FZD7 | -0.390984408 | 9.024572145 | -3.326272711 | 0.001168778 | 0.027675224 | -1.032230293 |
| THBD | -0.850797836 | 5.644380632 | -3.323951452 | 0.001177713 | 0.02780912 | -1.038962306 |
| MICAL2 | -0.552413497 | 9.417408145 | -3.322973135 | 0.001181498 | 0.027819735 | -1.041798419 |
| PTPN2 | 0.476585017 | 9.129765957 | 3.322141054 | 0.001184726 | 0.027819735 | -1.044210059 |
| RNF40 | -0.258496917 | 7.949716581 | -3.321231358 | 0.001188265 | 0.027825751 | -1.046846086 |
| YAF2 | 0.244105072 | 8.418475094 | 3.31810747 | 0.001200492 | 0.028028109 | -1.055893653 |
| BSG | -0.460753058 | 9.901881744 | -3.317338748 | 0.001203519 | 0.028028109 | -1.058118994 |
| RABAC1 | -0.315257444 | 11.58492191 | -3.315963501 | 0.001208952 | 0.028031037 | -1.062099079 |
| DGCR9 | -0.196894553 | 6.558706034 | -3.31408895 | 0.001216394 | 0.028031037 | -1.067522006 |
| CDKN2D | -0.207133125 | 7.362137761 | -3.313841817 | 0.001217379 | 0.028031037 | -1.068236753 |
| FEZ1 | 0.317735414 | 9.932368581 | 3.313536612 | 0.001218595 | 0.028031037 | -1.069119393 |
| JAG1 | -0.395090636 | 9.630827966 | -3.312686535 | 0.00122199 | 0.028031037 | -1.07157743 |
| TBCA | 0.188358919 | 11.43965442 | 3.312312895 | 0.001223485 | 0.028031037 | -1.072657663 |
| BCKDHB | 0.194078422 | 7.387514325 | 3.311195982 | 0.001227964 | 0.028057823 | -1.075886177 |
| STAG1 | 0.375392678 | 9.400394521 | 3.308101696 | 0.001240453 | 0.028266988 | -1.084825748 |
| HPCAL1 | -0.378386597 | 9.399456624 | -3.30542856 | 0.001251337 | 0.028371016 | -1.092543052 |
| DGCR6L | -0.222094783 | 7.116080402 | -3.305133849 | 0.001252543 | 0.028371016 | -1.093393561 |
| TCEAL1 | 0.251618181 | 9.377671821 | 3.304519673 | 0.001255059 | 0.028371016 | -1.095165824 |
| NDUFS4 | 0.191574231 | 10.78133463 | 3.30324021 | 0.001260314 | 0.028414055 | -1.098856958 |
| CHST2 | 0.341303153 | 8.281078068 | 3.302215207 | 0.00126454 | 0.028433696 | -1.101813149 |
| CNPY2 | 0.244747344 | 10.91776965 | 3.297997605 | 0.001282066 | 0.028751511 | -1.113969099 |
| TGOLN2 | -0.260331017 | 8.652361547 | -3.29715607 | 0.00128559 | 0.02875447 | -1.116393032 |
| PCYT2 | -0.414225472 | 7.246370316 | -3.289331231 | 0.001318793 | 0.0294195 | -1.13890706 |
| SMG7 | -0.498521475 | 7.450606957 | -3.287528255 | 0.001326557 | 0.029478052 | -1.144088416 |
| MAPK8IP1 | -0.297602494 | 7.294456974 | -3.286353993 | 0.001331636 | 0.029478052 | -1.147461726 |
| APRT | -0.582225728 | 7.757553778 | -3.286304516 | 0.00133185 | 0.029478052 | -1.147603837 |
| ZNF248 | 0.24270555 | 7.504390983 | 3.284234989 | 0.001340847 | 0.029599903 | -1.153546487 |
| FGF7 | 0.7615306 | 7.295558274 | 3.281531964 | 0.001352684 | 0.029783644 | -1.161303569 |
| JAG2 | -0.42278525 | 6.274523538 | -3.274104079 | 0.001385716 | 0.030322011 | -1.182592772 |
| PPIB | -0.567880533 | 9.777599188 | -3.273984098 | 0.001386256 | 0.030322011 | -1.182936324 |
| CLTCL1 | -0.436650292 | 6.09311265 | -3.273626327 | 0.001387866 | 0.030322011 | -1.183960703 |
| PPP2R3A | 0.431346178 | 10.13143304 | 3.269353104 | 0.001407237 | 0.030666186 | -1.196188717 |
| SOD1 | 0.2283231 | 12.60082263 | 3.266744335 | 0.001419186 | 0.030847288 | -1.20364733 |
| NDEL1 | -0.4021299 | 8.248566154 | -3.264412985 | 0.001429945 | 0.030956243 | -1.210308617 |
| SLC18A2 | 0.422332667 | 5.390606641 | 3.263455639 | 0.001434385 | 0.030956243 | -1.213042871 |
| RUSC1 | -0.248265231 | 9.21808647 | -3.262554726 | 0.001438575 | 0.030956243 | -1.215615338 |
| CSNK1G2 | -0.1513757 | 8.727762855 | -3.262505134 | 0.001438806 | 0.030956243 | -1.215756927 |
| ANKLE2 | -0.228562511 | 7.146657897 | -3.261316036 | 0.001444355 | 0.030996952 | -1.219151336 |
| SSR4 | 0.2712965 | 12.52683864 | 3.258953752 | 0.001455437 | 0.031117091 | -1.225891696 |
| DLEU1 | 0.399103817 | 8.03546694 | 3.258280981 | 0.001458608 | 0.031117091 | -1.227810587 |
| PRDX3 | 0.267922861 | 10.46985495 | 3.256990598 | 0.001464707 | 0.031117091 | -1.231490128 |
| GRK6 | -0.35714435 | 8.469031094 | -3.256372472 | 0.001467638 | 0.031117091 | -1.233252293 |
| IQGAP1 | -0.580607206 | 8.204757675 | -3.255851934 | 0.00147011 | 0.031117091 | -1.234736039 |
| MID1 | 0.450737164 | 8.680931017 | 3.255459118 | 0.001471978 | 0.031117091 | -1.235855594 |
| HSF1 | -0.454846522 | 7.284431085 | -3.247875444 | 0.001508477 | 0.031800977 | -1.257447682 |
| SLIT2 | 0.344386842 | 7.935840547 | 3.247187022 | 0.001511831 | 0.031800977 | -1.259405679 |
| GTF2A2 | 0.176477436 | 10.55929337 | 3.246372777 | 0.001515808 | 0.031805707 | -1.261721091 |
| DLD | 0.172836697 | 9.460319667 | 3.244703749 | 0.00152399 | 0.031898435 | -1.266465687 |
| EIF3F | 0.307311614 | 10.23475454 | 3.243430972 | 0.001530258 | 0.031922182 | -1.270082488 |
| FMR1 | 0.308878969 | 9.33457559 | 3.242632324 | 0.001534203 | 0.031922182 | -1.272351375 |
| GSAP | 0.770022106 | 8.341796821 | 3.242183807 | 0.001536422 | 0.031922182 | -1.273625367 |
| FOXE1 | -0.306316464 | 7.003584462 | -3.237334062 | 0.001560614 | 0.032345543 | -1.287391507 |
| MAP4K1 | -0.439617764 | 5.61848112 | -3.235355529 | 0.001570585 | 0.032404479 | -1.293002715 |
| PSMB1 | 0.262233664 | 12.07098917 | 3.235253128 | 0.001571103 | 0.032404479 | -1.293293051 |
| RAB1A | 0.211780772 | 10.22365728 | 3.232576414 | 0.001584692 | 0.032605415 | -1.300879598 |
| RFNG | -0.397940689 | 7.303013111 | -3.230850107 | 0.001593513 | 0.032707537 | -1.305769663 |
| AUTS2 | 0.670442622 | 7.483152547 | 3.224944244 | 0.001624041 | 0.033151192 | -1.322482623 |
| EMG1 | 0.188188811 | 9.369068145 | 3.224812924 | 0.001624726 | 0.033151192 | -1.322853956 |
| CLSTN1 | -0.477855478 | 9.011279598 | -3.224208131 | 0.001627884 | 0.033151192 | -1.324563964 |
| FBLN2 | 0.634718275 | 9.606094427 | 3.223656104 | 0.001630771 | 0.033151192 | -1.326124544 |
| ADD1 | -0.343077178 | 8.96786735 | -3.220861469 | 0.001645462 | 0.03324816 | -1.334021575 |
| AMOT | 0.216175189 | 6.735591137 | 3.220548091 | 0.001647117 | 0.03324816 | -1.334906757 |
| MBD3 | -0.349768547 | 8.583810983 | -3.220053485 | 0.001649733 | 0.03324816 | -1.3363037 |
| SRP72 | 0.341352261 | 9.883961248 | 3.219770681 | 0.00165123 | 0.03324816 | -1.337102359 |
| MTSS1L | -0.395399656 | 5.940105265 | -3.218497565 | 0.001657985 | 0.033305074 | -1.340697006 |
| LAMA5 | -0.316682561 | 9.596843487 | -3.215399805 | 0.00167453 | 0.033495215 | -1.349438594 |
| CLNS1A | 0.366638942 | 9.133994103 | 3.215246437 | 0.001675353 | 0.033495215 | -1.349871203 |
| DOCK2 | -0.414631628 | 5.938895547 | -3.214032331 | 0.001681883 | 0.033518855 | -1.353295251 |
| DGKA | -0.217190514 | 9.574270145 | -3.21355728 | 0.001684444 | 0.033518855 | -1.354634706 |
| PTPN13 | 0.189505569 | 8.583647966 | 3.209009971 | 0.001709145 | 0.033874739 | -1.367447974 |
| TFF1 | -0.446191889 | 5.314670068 | -3.208795111 | 0.001710321 | 0.033874739 | -1.368053025 |
| MSN | -0.458733247 | 10.79450409 | -3.208010572 | 0.001714619 | 0.033880712 | -1.370262024 |
| LRRC41 | -0.212103344 | 8.430655291 | -3.20653141 | 0.001722751 | 0.033962223 | -1.37442562 |
| RAB31 | 0.24807565 | 10.89086024 | 3.204581955 | 0.001733522 | 0.034023907 | -1.379910572 |
| PET112 | 0.496722008 | 9.142917051 | 3.204512561 | 0.001733907 | 0.034023907 | -1.380105767 |
| IFI6 | -0.489145614 | 7.163075863 | -3.202859085 | 0.001743094 | 0.034036302 | -1.384755695 |
| MTX2 | 0.17067345 | 9.281195385 | 3.202478924 | 0.001745213 | 0.034036302 | -1.385824506 |
| CAT | 0.280241772 | 9.701996103 | 3.202233137 | 0.001746584 | 0.034036302 | -1.386515473 |
| TIMM44 | -0.396222714 | 7.43523294 | -3.201062774 | 0.001753126 | 0.03408544 | -1.389805038 |
| AKT1 | -0.566750881 | 8.08987935 | -3.199722802 | 0.001760645 | 0.034153289 | -1.393570096 |
| PLSCR1 | 0.452184628 | 10.0289738 | 3.197719213 | 0.001771943 | 0.034218322 | -1.399197331 |
| OXT | -0.231930011 | 6.844360538 | -3.197201809 | 0.001774872 | 0.034218322 | -1.400650024 |
| UQCRC1 | -0.435822331 | 9.053938846 | -3.196721564 | 0.001777594 | 0.034218322 | -1.401998213 |
| SVEP1 | 0.548565311 | 9.216674325 | 3.196272356 | 0.001780144 | 0.034218322 | -1.403259115 |
| RBPJ | 0.192836536 | 9.699619718 | 3.194396504 | 0.001790829 | 0.034303663 | -1.408522942 |
| WWOX | 0.245355864 | 8.130304821 | 3.194073083 | 0.001792677 | 0.034303663 | -1.40943023 |
| DPY19L1 | 0.204696975 | 8.386067342 | 3.191532962 | 0.001807255 | 0.034504724 | -1.416553347 |
| WBP4 | 0.212504594 | 9.060401897 | 3.188669659 | 0.001823819 | 0.034672933 | -1.424577074 |
| PNO1 | 0.291981753 | 8.850887299 | 3.188596319 | 0.001824245 | 0.034672933 | -1.424782514 |
| BMP4 | 0.415907783 | 9.315502726 | 3.185367824 | 0.001843096 | 0.034952854 | -1.433822214 |
| SNX13 | 0.24064935 | 7.94163847 | 3.182230403 | 0.001861589 | 0.035224747 | -1.442599582 |
| LIMK1 | -0.3849395 | 5.613902846 | -3.181504223 | 0.001865893 | 0.035227568 | -1.444630139 |
| USP9Y | -0.504756847 | 6.152401821 | -3.179592475 | 0.00187727 | 0.035363602 | -1.449973955 |
| CCND3 | -0.403880961 | 8.586166085 | -3.177831324 | 0.001887808 | 0.035483261 | -1.454894437 |
| PALLD | -0.499888281 | 9.749846068 | -3.175318429 | 0.001902939 | 0.035688535 | -1.46191127 |
| BTN2A1 | -0.563093081 | 6.861174863 | -3.173191043 | 0.001915837 | 0.035833332 | -1.467848008 |
| RARRES1 | 0.599858444 | 7.834765231 | 3.172014131 | 0.001923008 | 0.035833332 | -1.471130898 |
| ZEB2 | -0.555129822 | 6.70000053 | -3.171959447 | 0.001923342 | 0.035833332 | -1.47128341 |
| DYNLT3 | -0.261927853 | 10.30213406 | -3.168846344 | 0.001942432 | 0.036057164 | -1.479962094 |
| GATAD1 | 0.340025978 | 8.880282333 | 3.168614103 | 0.001943863 | 0.036057164 | -1.480609248 |
| MAPK9 | 0.1897551 | 9.352543453 | 3.167782107 | 0.001948998 | 0.036073482 | -1.482927331 |
| PSMB4 | 0.291321197 | 11.49330879 | 3.164802348 | 0.001967493 | 0.036336466 | -1.491225263 |
| OFD1 | 0.252416769 | 8.377668692 | 3.162519036 | 0.001981776 | 0.036484747 | -1.497579328 |
| GNB2 | -0.219450297 | 10.56650703 | -3.16214413 | 0.00198413 | 0.036484747 | -1.498622259 |
| PLXND1 | -0.3251804 | 9.438787171 | -3.160176951 | 0.001996526 | 0.036592201 | -1.504092959 |
| TAF4 | 0.354253703 | 7.162945188 | 3.15941085 | 0.002001373 | 0.036592201 | -1.506222703 |
| C14orf2 | 0.22218275 | 10.6025496 | 3.159166117 | 0.002002923 | 0.036592201 | -1.506902965 |
| ZNF529 | 0.430382811 | 7.388830462 | 3.15572206 | 0.002024864 | 0.036910239 | -1.516471407 |
| ANK3 | 0.330213242 | 8.111553385 | 3.154767064 | 0.002030988 | 0.036910239 | -1.519123071 |
| MCCC2 | 0.246013622 | 8.500447513 | 3.153644803 | 0.002038205 | 0.036910239 | -1.522238309 |
| CALCOCO2 | 0.195947578 | 11.11761312 | 3.153175531 | 0.002041231 | 0.036910239 | -1.523540666 |
| GNG12 | 0.2270765 | 12.26073606 | 3.152602648 | 0.002044929 | 0.036910239 | -1.525130351 |
| SLC16A4 | 0.304288675 | 9.338164675 | 3.151930975 | 0.002049274 | 0.036910239 | -1.52699386 |
| ARIH1 | 0.322777756 | 9.926603402 | 3.151693711 | 0.002050811 | 0.036910239 | -1.527652051 |
| SMAGP | 0.284766417 | 8.460108128 | 3.15071075 | 0.002057189 | 0.036939619 | -1.530378435 |
| TCFL5 | 0.304617097 | 8.687105769 | 3.150100359 | 0.002061158 | 0.036939619 | -1.532071082 |
| DYNLT1 | 0.30800725 | 11.23173841 | 3.148557584 | 0.002071224 | 0.037041698 | -1.536348054 |
| RRP8 | 0.346033231 | 7.633498607 | 3.146437347 | 0.002085131 | 0.037173922 | -1.542223034 |
| TICAM1 | -0.217696217 | 8.150141325 | -3.14609457 | 0.002087388 | 0.037173922 | -1.543172525 |
| DAAM1 | 0.211847794 | 8.477978615 | 3.143161493 | 0.002106789 | 0.037440785 | -1.551293589 |
| CLIC2 | 0.389659486 | 5.869204547 | 3.141606568 | 0.002117143 | 0.037546065 | -1.555596269 |
| GSN | -0.398176003 | 9.449236231 | -3.140777584 | 0.002122682 | 0.037565706 | -1.557889444 |
| SART1 | -0.470474569 | 7.376622256 | -3.139260607 | 0.002132852 | 0.037667063 | -1.562084461 |
| EIF3J | 0.347299175 | 8.879170675 | 3.138072624 | 0.002140849 | 0.037729682 | -1.565368499 |
| PRNP | 0.220908786 | 10.52846115 | 3.136900489 | 0.002148766 | 0.037790644 | -1.5686077 |
| TUBB | -0.463141986 | 10.67094912 | -3.135370502 | 0.002159141 | 0.037894494 | -1.572834303 |
| TNFSF4 | -0.827054186 | 5.369906111 | -3.134263106 | 0.00216668 | 0.037948231 | -1.575892411 |
| NKG7 | -0.444272281 | 6.038676504 | -3.131741837 | 0.002183934 | 0.038171566 | -1.582851589 |
| RBL1 | -0.387654686 | 5.757989419 | -3.127314141 | 0.002214544 | 0.038558729 | -1.595061471 |
| SHOX | 0.535616267 | 7.776858923 | 3.127045086 | 0.002216417 | 0.038558729 | -1.595802955 |
| TCAP | -0.394013453 | 7.543562128 | -3.12591854 | 0.002224275 | 0.038558729 | -1.598906992 |
| VOPP1 | -0.247214475 | 10.17735761 | -3.125917825 | 0.00222428 | 0.038558729 | -1.598908962 |
| C5orf15 | 0.217474986 | 11.18220757 | 3.123416623 | 0.002241818 | 0.03878345 | -1.605797306 |
| TMEM186 | 0.369003928 | 8.711937393 | 3.120395617 | 0.002263172 | 0.039021019 | -1.614111015 |
| SSB | 0.236028989 | 10.81115232 | 3.119402896 | 0.00227023 | 0.039021019 | -1.616841469 |
| NPR3 | 0.397458106 | 9.560767863 | 3.118767154 | 0.002274761 | 0.039021019 | -1.618589679 |
| HEPH | 0.420041303 | 6.444611444 | 3.118332039 | 0.002277867 | 0.039021019 | -1.619786018 |
| SEMA4F | -0.275362567 | 7.241298376 | -3.118133862 | 0.002279283 | 0.039021019 | -1.620330856 |
| MAP3K4 | 0.151919233 | 8.581974974 | 3.116509765 | 0.002290917 | 0.039021019 | -1.624794792 |
| TUBB3 | -0.3093022 | 10.58732239 | -3.116466042 | 0.002291231 | 0.039021019 | -1.624914939 |
| CTBS | 0.211262636 | 8.719440291 | 3.116306698 | 0.002292376 | 0.039021019 | -1.625352797 |
| CHRND | -0.356249294 | 6.312046179 | -3.113737035 | 0.002310907 | 0.0392097 | -1.632411296 |
| WDR43 | 0.502598872 | 10.16455923 | 3.113487879 | 0.002312711 | 0.0392097 | -1.63309543 |
| DHRS1 | -0.198376286 | 9.454027581 | -3.110008255 | 0.002338044 | 0.03950376 | -1.642645002 |
| MRPL40 | 0.343944072 | 8.610506043 | 3.109826323 | 0.002339376 | 0.03950376 | -1.643144053 |
| LGMN | -0.576213114 | 8.713234197 | -3.108094369 | 0.002352087 | 0.039639454 | -1.647893686 |
| BMPR2 | -0.312159067 | 7.649907598 | -3.105173029 | 0.002373674 | 0.039840645 | -1.655899983 |
| BTN3A2 | 0.344044817 | 8.756781402 | 3.104428273 | 0.002379206 | 0.039840645 | -1.657940066 |
| KCNJ8 | 0.360348911 | 7.922924179 | 3.103801055 | 0.002383875 | 0.039840645 | -1.65965786 |
| RANGAP1 | -0.482277939 | 8.709171402 | -3.1035466 | 0.002385772 | 0.039840645 | -1.660354667 |
| PLAGL1 | 0.206456214 | 9.920770778 | 3.103311521 | 0.002387525 | 0.039840645 | -1.660998369 |
| CTSL | 0.260392453 | 10.90134829 | 3.101846584 | 0.002398477 | 0.039944781 | -1.665008795 |
| SEPP1 | 0.863061042 | 7.793285957 | 3.09994406 | 0.002412771 | 0.040040034 | -1.670214778 |
| KATNB1 | -0.285351961 | 7.868899274 | -3.099828287 | 0.002413644 | 0.040040034 | -1.670531489 |
| ERBB2 | -0.276881847 | 7.451863718 | -3.099199697 | 0.002418385 | 0.040040335 | -1.672250889 |
| PPP2R5B | -0.487705611 | 6.854776752 | -3.094391081 | 0.002454944 | 0.040507844 | -1.685394301 |
| FKBP15 | -0.262492942 | 8.065803385 | -3.094229784 | 0.002456179 | 0.040507844 | -1.685834876 |
| RUSC2 | -0.206078917 | 9.698254795 | -3.092625549 | 0.002468495 | 0.040510424 | -1.690215714 |
| POR | -0.209333328 | 8.512635598 | -3.092052335 | 0.00247291 | 0.040510424 | -1.691780579 |
| SUPT5H | -0.184583044 | 9.433422521 | -3.091110466 | 0.002480179 | 0.040510424 | -1.694351337 |
| PPIC | 0.161878933 | 10.20960224 | 3.091011526 | 0.002480944 | 0.040510424 | -1.694621345 |
| SLC7A5 | -0.502497797 | 9.910851991 | -3.090853233 | 0.002482168 | 0.040510424 | -1.695053319 |
| HNRNPDL | 0.204146019 | 8.891098547 | 3.090486102 | 0.002485009 | 0.040510424 | -1.696055124 |
| FADS2 | -0.497086389 | 8.276378872 | -3.089508167 | 0.002492591 | 0.04055604 | -1.698723164 |
| KCNK2 | 0.574417081 | 6.106657299 | 3.08582494 | 0.002521342 | 0.040813143 | -1.708765487 |
| TOM1L2 | -0.467631567 | 6.287983872 | -3.085554323 | 0.002523467 | 0.040813143 | -1.709502926 |
| PDK3 | 0.448565578 | 9.153325556 | 3.085454272 | 0.002524252 | 0.040813143 | -1.709775555 |
| AIMP2 | 0.202628233 | 9.37571088 | 3.08502188 | 0.002527651 | 0.040813143 | -1.710953687 |
| LEPROTL1 | 0.308582756 | 9.748549897 | 3.084021255 | 0.002535533 | 0.040862574 | -1.713679546 |
| FGFR2 | 0.251371708 | 6.480329607 | 3.082935156 | 0.002544114 | 0.040923063 | -1.716637403 |
| ENO2 | -0.590857728 | 7.258474778 | -3.076442173 | 0.002595976 | 0.041554842 | -1.734301873 |
| HIST1H4L | -0.367180347 | 5.105842359 | -3.076099169 | 0.002598743 | 0.041554842 | -1.735234155 |
| MED7 | 0.234978308 | 8.931583009 | 3.075654669 | 0.002602332 | 0.041554842 | -1.736442172 |
| GSE1 | 0.448049211 | 7.505126564 | 3.075503928 | 0.002603551 | 0.041554842 | -1.736851808 |
| CHPF | -0.255637992 | 9.101373043 | -3.074966201 | 0.002607901 | 0.041554842 | -1.738312931 |
| CSK | -0.544372222 | 7.115012513 | -3.073730964 | 0.00261792 | 0.041607894 | -1.741668526 |
| CDC123 | 0.201451328 | 10.7384142 | 3.072647039 | 0.002626741 | 0.041607894 | -1.744612129 |
| SNRNP27 | 0.2418309 | 9.768862829 | 3.072205896 | 0.002630339 | 0.041607894 | -1.745809887 |
| GAK | -0.200354833 | 8.942059726 | -3.072141561 | 0.002630864 | 0.041607894 | -1.745984553 |
| GEMIN2 | 0.302418367 | 7.874224701 | 3.070546852 | 0.00264391 | 0.041729096 | -1.750313092 |
| ASCC2 | -0.324543103 | 7.85408441 | -3.070003102 | 0.002648372 | 0.041729096 | -1.751788565 |
| BTF3 | 0.258639547 | 11.04133318 | 3.069299944 | 0.002654153 | 0.041742591 | -1.753696265 |
| PGLYRP1 | -0.273407039 | 5.565825863 | -3.068063589 | 0.002664346 | 0.041825292 | -1.757049656 |
| BAP1 | -0.333041233 | 8.456198607 | -3.065261065 | 0.002687584 | 0.042069645 | -1.764646767 |
| MEST | 0.430801242 | 11.29647408 | 3.063797341 | 0.002699795 | 0.042069645 | -1.768612307 |
| LGALS3 | 0.324818694 | 11.37820602 | 3.063565895 | 0.002701731 | 0.042069645 | -1.769239197 |
| DGAT1 | -0.265264061 | 8.121427444 | -3.063371509 | 0.002703357 | 0.042069645 | -1.769765676 |
| POP4 | 0.254163517 | 9.794432504 | 3.063208109 | 0.002704725 | 0.042069645 | -1.77020821 |
| JUND | -0.259530922 | 10.21997991 | -3.062326832 | 0.002712115 | 0.04210732 | -1.772594615 |
| BTBD2 | -0.278339761 | 8.345593718 | -3.059996648 | 0.002731743 | 0.042334527 | -1.778901706 |
| TUBA4A | -0.477658997 | 8.899710154 | -3.058759234 | 0.00274222 | 0.042419339 | -1.782249352 |
| TPST2 | -0.462482133 | 8.649070923 | -3.057802537 | 0.002750345 | 0.042467537 | -1.784836772 |
| NIPAL3 | -0.648133222 | 7.226740325 | -3.056184152 | 0.002764141 | 0.042505294 | -1.789212188 |
| STAT5A | 0.343796831 | 8.765777897 | 3.05612447 | 0.002764651 | 0.042505294 | -1.789373505 |
| RBM15B | 0.185070033 | 9.168881393 | 3.055752346 | 0.002767833 | 0.042505294 | -1.790379274 |
| ACTR2 | -0.388885989 | 9.794355077 | -3.053936826 | 0.002783405 | 0.042667135 | -1.795284733 |
| RAD1 | 0.175177358 | 9.314757949 | 3.052530569 | 0.002795522 | 0.042775531 | -1.799082683 |
| HNRNPA1 | 0.293251983 | 8.037163974 | 3.050989558 | 0.002808857 | 0.042902126 | -1.803242865 |
| GLMN | 0.258933906 | 8.117006103 | 3.047820548 | 0.002836463 | 0.043214885 | -1.811792471 |
| DGKZ | -0.165166439 | 8.927260085 | -3.047470364 | 0.002839529 | 0.043214885 | -1.812736763 |
| SPTLC1 | 0.324609242 | 10.95334178 | 3.045918524 | 0.002853153 | 0.043344405 | -1.816920281 |
| LMF2 | -0.237829181 | 9.875519308 | -3.045053451 | 0.002860774 | 0.043382431 | -1.819251599 |
| 10-Sep | 0.178610186 | 10.76990635 | 3.043309909 | 0.00287619 | 0.043538331 | -1.823948625 |
| NPEPPS | 0.276576475 | 10.04337303 | 3.041822655 | 0.002889401 | 0.043660349 | -1.827953422 |
| DAG1 | -0.48723275 | 7.923265427 | -3.040495442 | 0.002901238 | 0.043702775 | -1.831525862 |
| AP1S2 | -0.366340856 | 9.022444726 | -3.039471192 | 0.002910404 | 0.043702775 | -1.834281918 |
| ATG12 | 0.289272083 | 9.243725077 | 3.038904807 | 0.002915483 | 0.043702775 | -1.83580561 |
| KIF5C | -0.28345765 | 5.38833241 | -3.03884155 | 0.002916051 | 0.043702775 | -1.835975769 |
| KDM6B | -0.324168103 | 7.596482752 | -3.038551581 | 0.002918656 | 0.043702775 | -1.836755738 |
| PPP1R11 | 0.320254389 | 12.02078738 | 3.037282919 | 0.002930075 | 0.043702775 | -1.840167489 |
| UBE2D3 | 0.421899286 | 9.74690747 | 3.036960881 | 0.00293298 | 0.043702775 | -1.841033336 |
| POLR2B | 0.223338756 | 10.18586463 | 3.036727476 | 0.002935088 | 0.043702775 | -1.841660832 |
| SNED1 | 0.414172378 | 7.651880291 | 3.036337907 | 0.002938608 | 0.043702775 | -1.842708077 |
| GPR116 | -0.835424969 | 7.925606051 | -3.035658301 | 0.002944759 | 0.04371755 | -1.844534726 |
| SH3YL1 | 0.303875636 | 8.903734675 | 3.034639654 | 0.002954 | 0.04377808 | -1.847272004 |
| SMNDC1 | 0.276600617 | 10.4179711 | 3.033333342 | 0.002965891 | 0.043877587 | -1.850781143 |
| BAMBI | 0.338860261 | 10.19255545 | 3.031574401 | 0.002981971 | 0.044038625 | -1.85550415 |
| GFPT2 | 0.284532364 | 8.773806983 | 3.029982082 | 0.002996598 | 0.044112261 | -1.859777742 |
| DECR1 | 0.189114667 | 9.574540744 | 3.029898768 | 0.002997365 | 0.044112261 | -1.860001295 |
| TCIRG1 | -0.371091781 | 8.753830017 | -3.028658987 | 0.003008802 | 0.044139771 | -1.86332732 |
| NCLN | -0.174612886 | 7.653957906 | -3.028567398 | 0.003009648 | 0.044139771 | -1.863572985 |
| H1FX | -0.306475286 | 9.227400154 | -3.027658667 | 0.003018059 | 0.044186675 | -1.866010088 |
| CHMP2A | 0.257344989 | 11.36220056 | 3.023388365 | 0.003057874 | 0.044692404 | -1.877454175 |
| MFAP5 | 0.485655908 | 11.07166747 | 3.021999139 | 0.00307093 | 0.04469697 | -1.881174234 |
| DGUOK | 0.173417061 | 9.168678342 | 3.021495706 | 0.003075675 | 0.04469697 | -1.882521963 |
| PIBF1 | 0.210022422 | 8.560526966 | 3.021030696 | 0.003080063 | 0.04469697 | -1.883766663 |
| TROAP | -0.224502217 | 7.073740855 | -3.020417437 | 0.003085859 | 0.04469697 | -1.885407932 |
| TRIM2 | 0.423761344 | 9.499620855 | 3.020021467 | 0.003089607 | 0.04469697 | -1.88646752 |
| ZFYVE9 | 0.316972394 | 8.549260487 | 3.019998688 | 0.003089822 | 0.04469697 | -1.886528471 |
| ZNF189 | 0.233839992 | 8.422027889 | 3.017765321 | 0.003111041 | 0.044927245 | -1.892502548 |
| RAD50 | 0.205369675 | 8.415531128 | 3.0163864 | 0.003124208 | 0.045040671 | -1.896189172 |
| RPL34 | 0.309683942 | 11.91110778 | 3.015765293 | 0.003130156 | 0.045049805 | -1.89784927 |
| TEK | -0.30651635 | 8.565779735 | -3.012395492 | 0.003162609 | 0.045439724 | -1.90685101 |
| ADARB1 | 0.221944817 | 9.228132641 | 3.009924172 | 0.003186606 | 0.045707039 | -1.913447194 |
| FLOT2 | -0.185518939 | 9.073155256 | -3.008349848 | 0.003201981 | 0.045849982 | -1.917646805 |
| ATIC | 0.170335069 | 9.810545419 | 3.007362672 | 0.003211656 | 0.045910975 | -1.92027921 |
| NMNAT2 | -0.497911158 | 5.098970778 | -3.000420352 | 0.003280464 | 0.046815647 | -1.938770793 |
| STIP1 | -0.453945739 | 8.510218291 | -2.999829005 | 0.003286388 | 0.046821357 | -1.940344222 |
| RAB9A | 0.218185692 | 9.269227282 | 2.99927245 | 0.003291972 | 0.04682222 | -1.941824836 |
| WDR47 | -0.245141336 | 8.500506274 | -2.998065795 | 0.003304108 | 0.046916122 | -1.945034122 |
| CIAO1 | 0.294520958 | 9.43252 | 2.996368008 | 0.003321254 | 0.047080725 | -1.949547783 |
| NUBP1 | 0.239899531 | 9.578957786 | 2.995539835 | 0.003329648 | 0.047120912 | -1.951748736 |
| NRP1 | 0.337990514 | 7.510607282 | 2.994815965 | 0.003337001 | 0.047146256 | -1.953672067 |
| COL4A4 | 0.547422 | 7.52441059 | 2.992878472 | 0.003356754 | 0.047346426 | -1.958818062 |
| SCFD1 | 0.144505747 | 9.751674564 | 2.990403453 | 0.003382144 | 0.047525916 | -1.965387592 |
| STS | 0.302479653 | 8.968546564 | 2.989978137 | 0.003386525 | 0.047525916 | -1.966516056 |
| NR1D2 | 0.336619556 | 8.395063171 | 2.989544226 | 0.003391 | 0.047525916 | -1.967667183 |
| SCP2 | 0.161682317 | 10.81665681 | 2.989310797 | 0.00339341 | 0.047525916 | -1.968286391 |
| SLC29A2 | -0.164619086 | 7.371913009 | -2.988913771 | 0.003397512 | 0.047525916 | -1.969339469 |
| NFE2L3 | 0.439423611 | 6.105652026 | 2.986994952 | 0.003417401 | 0.047644936 | -1.974427301 |
| KCNG1 | -0.299113836 | 6.609555786 | -2.986210039 | 0.003425567 | 0.047644936 | -1.976507728 |
| MGAT1 | -0.656144494 | 10.72902343 | -2.986102495 | 0.003426688 | 0.047644936 | -1.976792737 |
| CCT7 | 0.172101553 | 11.88241864 | 2.985928414 | 0.003428502 | 0.047644936 | -1.977254066 |
| CNR1 | 0.635185975 | 7.688918256 | 2.984141806 | 0.003447173 | 0.047750617 | -1.98198738 |
| MAP3K5 | -0.584421967 | 5.926814043 | -2.984122736 | 0.003447373 | 0.047750617 | -1.98203789 |
| GRM1 | -0.162402364 | 6.918129427 | -2.98018908 | 0.003488814 | 0.048245801 | -1.992450857 |
| EIF3I | 0.273910803 | 11.85626957 | 2.979371033 | 0.00349749 | 0.048287003 | -1.994614876 |
| HDLBP | -0.345039839 | 9.312951786 | -2.978511443 | 0.003506627 | 0.048334438 | -1.99688824 |
| NCBP2 | 0.199200289 | 8.394361829 | 2.976447808 | 0.003528654 | 0.048535957 | -2.002343665 |
| MTIF2 | 0.206483697 | 8.880286376 | 2.976070176 | 0.003532699 | 0.048535957 | -2.003341624 |
| CORO2B | 0.441623339 | 7.191230991 | 2.975421983 | 0.003539651 | 0.048552783 | -2.005054335 |
| AFF1 | 0.352396097 | 9.388708308 | 2.974475381 | 0.003549826 | 0.048613696 | -2.007554953 |
| PSMA4 | 0.228630361 | 10.04392273 | 2.972227865 | 0.003574094 | 0.048781486 | -2.013489443 |
| GNMT | -0.421426347 | 5.283490291 | -2.971582943 | 0.003581086 | 0.048781486 | -2.015191629 |
| VPS26A | -0.482641125 | 8.738061145 | -2.971189878 | 0.003585353 | 0.048781486 | -2.016228918 |
| SNAPC1 | 0.234340036 | 8.921371436 | 2.970691871 | 0.003590767 | 0.048781486 | -2.017542975 |
| TSPAN2 | 0.275540672 | 6.925558598 | 2.970684107 | 0.003590851 | 0.048781486 | -2.01756346 |
| FUBP3 | -0.477487483 | 7.60887794 | -2.967479781 | 0.003625865 | 0.049178334 | -2.026013982 |
| DR1 | -0.355728467 | 7.585757915 | -2.966932024 | 0.003631882 | 0.04918125 | -2.027457758 |
| HDDC2 | 0.264296464 | 9.180756556 | 2.965429869 | 0.003648429 | 0.049277265 | -2.031415962 |
| NT5E | -0.525539019 | 8.853194205 | -2.965233415 | 0.003650598 | 0.049277265 | -2.031933496 |
| INSL3 | -0.178995686 | 7.096222325 | -2.962586773 | 0.003679938 | 0.049594332 | -2.038902873 |
| BEST1 | 0.397730872 | 8.485459718 | 2.958875607 | 0.003721444 | 0.049869453 | -2.04866648 |
| CDK14 | 0.303858922 | 9.54347565 | 2.95838493 | 0.003726964 | 0.049869453 | -2.049956605 |
| ALDH7A1 | 0.262650061 | 8.194884504 | 2.958313101 | 0.003727773 | 0.049869453 | -2.050145447 |
| LMO4 | 0.405216003 | 7.741227906 | 2.958216147 | 0.003728865 | 0.049869453 | -2.05040034 |
| RGS19 | -0.429282039 | 7.951308385 | -2.958136068 | 0.003729767 | 0.049869453 | -2.050610861 |
| CSRP1 | -0.287280228 | 11.25125541 | -2.957469303 | 0.003737285 | 0.049891283 | -2.052363548 |
| CTDNEP1 | 0.244264864 | 9.664508983 | 2.956475121 | 0.003748521 | 0.049898116 | -2.054976271 |
| DPYD | 0.355082167 | 9.712537231 | 2.956382483 | 0.003749569 | 0.049898116 | -2.055219685 |

**Supplementary Table 2** The 7460 regulated cell death (RCD) genes

| ABCC1 | SH3GL2 | BCR | ACOX2 | AQP3 |
| --- | --- | --- | --- | --- |
| ACE | ARHGEF7 | BCS1L | ACY3 | AQP5 |
| ADSL | BRINP1 | BLNK | APOF | AQP8 |
| AHCY | CCN4 | BMP2K | ARHGEF10L | LINC00618 |
| ANXA1 | CD24 | BMPER | ARMC10 | MT1DP |
| ARNT | CKS1B | BMPR2 | ATF5 | PEX10 |
| ARPC1B | CUL1 | BZW1 | ATOH8 | PEX12 |
| BCL6 | DEPDC1 | C1S | BLVRA | GPAT4 |
| BTG3 | DUSP1 | C3 | CBX6 | BRPF1 |
| CCL28 | FOXA1 | C5 | CCDC178 | INTS2 |
| CCN2 | GEM | C5AR1 | CD22 | MMD |
| CCR2 | KAT2A | C8G | CD3G | CYP4F8 |
| CD53 | KAT2B | CA1 | CDC40 | MLLT1 |
| CD69 | LMLN | CAPG | CHST11 | TTPA |
| CD86 | MALAT1 | CAST | DHX33 | POM121L12 |
| CD8A | NEAT1 | CAT | DNAJC10 | LIG3 |
| CXCL2 | PDGFRB | CCL2 | DNMBP | AEBP2 |
| CXCR4 | PINX1 | CCL21 | DPY30 | AGPS |
| CYBB | PRMT5 | CCL27 | DRAM1 | PEX2 |
| CYCS | RING1 | CCL7 | ECHDC2 | PEX6 |
| DUSP5 | STMN1 | CCRL2 | FAH | TIMM9 |
| EBI3 | TOMM34 | CD19 | FRMD6 | LCE2C |
| EGFR | SMARCA4 | CD2 | GAS8 | FAR1 |
| ENTPD1 | PSMB9 | CD27 | GNAZ | PHF21A |
| ERBB2 | TSC22D1 | CD274 | GON4L | LYRM1 |
| FGF2 | G0S2 | CD38 | HPCAL1 | AMN |
| FN1 | PTCH1 | CD4 | HRH3 | PVT1 |
| FOLH1 | ADGRE5 | CD40 | INMT | TSC1 |
| FOXP3 | EMD | CD40LG | KANK3 | SIRT3 |
| FRZB | ID4 | CD46 | KBTBD11 | CGAS |
| GBP1 | PDGFA | CD47 | KPNA3 | STING1 |
| GCLC | PSMA4 | CD48 | LHB | HDDC3 |
| GOLPH3 | PSME1 | CDH1 | LNX1 | MIR761 |
| HAVCR2 | RAN | CEL | LRRC28 | MIR214 |
| HGF | RHOA | CFI | LY9 | DLD |
| HK1 | UBE2I | CGA | MATR3 | MYCN |
| HLA-DQA1 | C6 | CHPT1 | METTL1 | IFNA2 |
| HLA-DRB1 | CTC1 | CISH | MIF4GD | IFNA4 |
| HLA-DRB3 | TIMP2 | CMA1 | MXRA8 | IFNA5 |
| HMGB1 | ATF7IP | CMAS | MYADM | IFNA6 |
| HNRNPC | DMRT1 | CMIP | NUDT21 | IFNA7 |
| HSPB8 | ERCC4 | COL11A2 | OCIAD2 | IFNA8 |
| IFNGR2 | PSMD12 | COL4A2 | PDE6D | IFNA10 |
| IGF1 | RTEL1 | COL4A5 | PLCG2 | IFNA13 |
| IGFBP3 | CDH13 | CPB2 | PLOD3 | IFNA14 |
| IL10RB | AKIRIN2 | CPE | PLVAP | IFNA16 |
| IL16 | ZBTB7A | CPOX | PPIL3 | IFNA17 |
| IL18 | ANP32E | CPQ | PPM1F | IFNA21 |
| IL18R1 | ATAD2 | CR2 | PRPS1 | PPARG |
| IL1R1 | CCNE2 | CREM | RPS17 | MIR335 |
| IL23A | CENPA | CRIP2 | RSU1 | PAQR3 |
| IL33 | CENPU | CRISPLD2 | SIX3 | TOR2A |
| IL4 | ERCC6L | CRTAP | SLC1A1 | MIR375 |
| IL6 | GMNN | CRYGC | SLC35A1 | MIR324 |
| ITGAL | KIF11 | CSF2 | SP6 | MIB2 |
| LCN2 | KIF15 | CTF1 | SPRYD4 | CLTRN |
| LDHD | KIF4A | CTLA4 | STAM2 | KLF2 |
| LRBA | MELK | CUX1 | STX17 | HOTAIR |
| LRP1 | NCAPG | CX3CL1 | SUMO2 | H19 |
| LZTFL1 | NEK2 | CXCL10 | TCAM1P | YTHDC2 |
| MARK3 | PTTG1 | CXCR6 | TEX101 | DDR2 |
| MET | RAD51AP1 | CYGB | TEX35 | TRIM46 |
| MOK | TACC3 | CYP11A1 | TIPRL | ACSL1 |
| MSX2 | TOP2A | CYP1A2 | TJP2 | KDM5A |
| MYD88 | TTK | CYP4F3 | TLN2 | GJA1 |
| NGF | BHLHE40 | CYTIP | TLNRD1 | SLC7A11 |
| NLRP3 | BRIP1 | DBNL | TSHB | CIRBP |
| OSBP | CCND2 | DDC | TTC23 | USP11 |
| PDE4DIP | CCNG2 | DDIT3 | TUBB6 | YAP1 |
| PPA1 | FANCA | DDR1 | TXNDC12 | MIR135B |
| PRKAB1 | GINS2 | DDX19A | ZCCHC4 | MIR302A |
| PTH | HES1 | DDX41 | ZCRB1 | ASMTL-AS1 |
| RAB9A | JAG2 | DES | B9D1 | PIEZO1 |
| RARA | PIM1 | DHODH | FHL3 | LIFR |
| RBM5 | PIMREG | DMD | PGM5 | MIR15A |
| RELB | PKD1 | DMTN | SNX10 | ARHGEF26-AS1 |
| RHOD | RSRC2 | DPEP1 | SVEP1 | COX4I2 |
| RPS6KB1 | SFPQ | DUSP28 | VRK3 | KDM6B |
| S1PR1 | TCF3 | DYNAP | ATP6V1C1 | METTL14 |
| SAA1 | BAG3 | DYRK3 | DIAPH2 | KDM5C |
| SCD | FOXC1 | EAF2 | ENO3 | CFL1 |
| SGPL1 | NUP62 | EDNRA | ALPK3 | MIR539 |
| SIRT5 | SMARCD3 | EEF1A2 | NAT9 | KMT2D |
| SLC11A1 | CTSD | EHMT1 | PWWP3A | ACSL3 |
| SLC6A1 | CDC27 | ELK3 | FMO2 | ACSL5 |
| SLTM | ACVR1 | EMB | PNPO | ACSL6 |
| SOD1 | ACVR1B | EPHA3 | ATP2B1 | AKR1C2 |
| SOS1 | ARHGEF2 | EPX | ITFG1 | AKR1C3 |
| SOX9 | ASPM | ERAP1 | TJP3 | COQ2 |
| STAT1 | BECN1 | ERG | DDAH2 | CTH |
| STAT3 | BMI1 | EVA1C | ERAL1 | FDFT1 |
| STAT5B | BRD7 | FABP1 | OVGP1 | MAP1LC3C |
| SYK | BTRC | FBF1 | NFKBIZ | PCBP1 |
| TBCA | CBX3 | FCER2 | STN1 | PCBP2 |
| TFDP2 | CCNG1 | FCGR2B | GMPR2 | SAT2 |
| TLE1 | CDC25B | FDXR | TMEM63A | SLC3A2 |
| TLR4 | CDC7 | FGF1 | PLPP1 | ACACA |
| UGCG | CDK13 | FKBP1A | RAD23A | CARS |
| USP9X | CDKN2B | FLT1 | URM1 | HSBP1 |
| VCAM1 | CENPK | FNDC5 | HOXC4 | MT1G |
| VIM | CIB1 | FOSB | GPN3 | OTUB1 |
| WNT5A | CIP2A | FYCO1 | SH3GL1 | PROM2 |
| XCL1 | CRK | G6PD | HCFC2 | SQLE |
| MMP7 | DEK | GATA3 | RP9 | AMPK |
| CIB2 | DIAPH3 | GATM | ZNF436 | MYH14 |
| DAXX | E2F2 | GDF10 | CNFN | PI3KC3 |
| ATRX | E2F6 | GJB6 | PORCN | ROCK |
| CHGB | ECT2 | GLYAT | DMRTB1 | RUBCN |
| FGFR4 | EREG | GPR84 | MATN3 | NADPH |
| SLC6A2 | FANCD2 | GTF2F2 | CFC1 | PDLIM1 |
| CCND1 | FLNA | GZMA | CBFA2T3 | FLNB |
| TPM1 | GAS1 | HAT1 | BET1L | DSTN |
| HRAS | GAS6 | HDGFL2 | RFTN1 | ANKRD9 |
| BAP1 | GLI1 | HLA-DPA1 | SETD6 | COX19 |
| CREBBP | GORASP1 | HPD | INHBB | AQP1 |
| EIF4E | KDM8 | HSPA14 | DEGS1 | AQP2 |
| DAB2 | KHDRBS1 | HSPB2 | GTF2F1 | BACE1 |
| MYB | KIF22 | HSPD1 | STAG3 | MT1A |
| ATP7A | LATS1 | HYLS1 | AHCYL1 | MT1B |
| PSG2 | LIN9 | ICAM1 | ARHGAP27 | MT1E |
| RNF2 | LINC00339 | IFI44L | CALCRL | MT1F |
| RORA | LONP1 | IFITM1 | CHP2 | MT1HL1 |
| TLR6 | LPIN1 | IFITM3 | UGT2A1 | MT1M |
| WWOX | LRP5 | IGF1R | GNA11 | COX17 |
| FUT4 | MTBP | IGHE | ADD2 | FKBP4 |
| PCNA | MZF1 | IGHG3 | PDE7A | HEPHL1 |
| EGR1 | NCAPD2 | IGHV3-23 | CGRRF1 | MMGT1 |
| PRLR | NEDD9 | IL10 | COPZ2 | PARK7 |
| ACTN4 | NFIB | IL15 | ETF1 | LIPT1 |
| CCNH | NUP98 | IL17A | GPCPD1 | DLAT |
| RBP4 | PAK4 | IL2 | SLC12A4 | PDHB |
| TIE1 | PARD3 | IL2RA | TOX4 | MTF1 |
| FGF13 | PDPN | IL31RA | TRDC | GLS |
| ITGB1 | PIN1 | IL3RA | SPAG1 | ABCA1 |
| TAL1 | PKD2 | IL5 | UBE3B | ABL2 |
| KIF14 | PKN2 | IL5RA | DYSF | ADAM10 |
| KIFC1 | PSMD14 | IMPA1 | PACRG | AP5Z1 |
| CDCA7 | PTPN3 | IP6K2 | DMAC2L | APOL1 |
| ETS1 | PTTG3P | IRF7 | FCER1G | ATP12A |
| HBEGF | RAD51 | ISG20 | IMPA2 | ATP1A3 |
| RAB7A | RAD51B | ITGA2B | KDSR | ATP4A |
| RIPK2 | RECQL5 | ITGA5 | NUDT5 | BDNF |
| SMAD4 | RGS3 | ITK | PNCK | BRAP |
| TXNRD2 | RPS27 | JAG1 | SMIM5 | CCR1 |
| RPS6KA3 | RRM1 | KCNA3 | LAS1L | CKLF |
| CEBPB | SENP2 | KCNE1 | BEND5 | COMT |
| DHRS3 | SIN3A | KCNJ2 | COL27A1 | CXCL3 |
| ARF1 | SKA1 | KCNMA1 | DCHS1 | DAAM1 |
| BCL3 | SLC9A3R1 | KLKB1 | DNAAF4 | DNMT3B |
| GADD45A | SPDYA | KLRC2 | EPDR1 | ERVW-1 |
| MDM4 | SPHK1 | KRT12 | FXYD1 | F2R |
| PRMT1 | SPRY1 | KRT20 | ISLR | FASTK |
| ADAM12 | SRD5A1 | KRT23 | NME3 | FBN1 |
| BNIP3L | SRSF3 | LDLR | SUPT4H1 | GAK |
| C1D | TIPIN | LGALS3 | DEFA6 | GNAS |
| CRYAB | TNKS | LIX1 | ABCD3 | GOLGB1 |
| CTNND1 | TRA2A | LRP2 | ABCD4 | GTF2B |
| CXADR | TRIM59 | LXN | APPL2 | HGFAC |
| CXCL13 | UBR7 | LYVE1 | ARL6IP6 | HHEX |
| CYP19A1 | USP2 | MAG | C1orf21 | HLA-C |
| EPHA1 | WEE1 | MALT1 | C1R | HNF1B |
| GDF11 | WNT10B | MAOA | CCDC93 | IL6R |
| HCLS1 | WWC1 | MAP1A | CHPF2 | IL6ST |
| ITGB5 | XPC | MASP2 | CSRNP3 | IL9 |
| MECOM | ZFX | MBL2 | CYP46A1 | IP6K1 |
| MTA1 | BUB1 | MC4R | EXOSC8 | ITGB3 |
| NRP2 | CEP55 | MCF2L | FN3K | IVD |
| PCSK5 | PBK | MED1 | HPS1 | JUND |
| PFN1 | UBE2C | MFGE8 | LNX2 | KITLG |
| POLR2A | CCND3 | MGP | MECR | MARCKSL1 |
| PRKD2 | MCM5 | MIB1 | MFAP3L | MAT2A |
| RAB1B | ANLN | MMP19 | NDUFA1 | MBTPS2 |
| RAB6A | CEP72 | MMP3 | NUBPL | MCAT |
| RBM3 | CYP1A1 | MPV17 | NXF2 | MLXIP |
| SERPINB2 | PLAG1 | MRAP | P2RY14 | MTUS1 |
| SIAH1 | PPM1D | MTOR | PARP6 | NAMPT |
| TFPI2 | RHEB | MUC16 | PBX4 | NDUFB7 |
| TNFRSF10B | UHRF1 | MVP | PHACTR3 | NR5A1 |
| IL23R | SKP1 | NAAA | PIK3R5 | NXF1 |
| CLASP2 | MAU2 | NDP | RAB21 | OASL |
| FLOT1 | CENPH | NDUFAF3 | RASD2 | PHB |
| NNMT | SLC44A2 | NECTIN1 | RNF216 | PLIN2 |
| PLCL1 | CDKN2C | NELFE | SDCBP2 | PMP22 |
| SUOX | CHFR | NOCT | SLC22A15 | RAB40B |
| HSF2 | AURKB | NR1I2 | SLC25A24 | REL |
| ID1 | TRIP13 | NR2E3 | SLIT1 | RIT1 |
| LOX | BMP4 | NR4A1 | SMAGP | RNMT |
| NDRG1 | RCAN1 | OCA2 | SMAP1 | RSAD2 |
| TPR | RRS1 | P2RY12 | SORCS1 | S100A1 |
| CPSF2 | BUB3 | P4HB | TAF1B | SETD2 |
| CTDSPL | CDC23 | PAGR1 | TPST1 | SIM2 |
| ENDOU | AFAP1L2 | PAOX | TSC22D2 | SLC33A1 |
| ERCC5 | AKAP9 | PCSK1N | VAMP5 | SLC38A7 |
| GPD2 | CBX5 | PCTP | VPS26C | SLC6A8 |
| HNRNPD | CDC73 | PDCD1 | WDR54 | SMOX |
| HOOK1 | CETN1 | PDF | ZNF560 | SOD2 |
| IGFBP1 | FSD1 | PDXK | TPMT | TANC2 |
| IQGAP1 | FYN | PECAM1 | EHD4 | TFPI |
| LIG4 | GADD45G | PFKFB3 | EPS8L2 | TJP1 |
| NRCAM | LTBP2 | PGF | SCHIP1 | TLE4 |
| SLC1A3 | MASTL | PIAS2 | LGALS13 | TLR2 |
| UBE2N | NCOA5 | PIGF | SPATA9 | USP18 |
| WDR11 | PPP6C | PIKFYVE | TAX1BP3 | UTP25 |
| ZNF331 | PTMS | PITX1 | GABRB1 | VEGFA |
| ST6GALNAC2 | RAP1GAP | PLA2G2D | CHD6 | ZC3HAV1 |
| HOXD9 | RBBP4 | PLA2G4A | RAB33A | PAX8 |
| SERPINB6 | RCC1 | PLAC8 | DTX4 | PRDX2 |
| RESF1 | SEC62 | PLAT | ACTN3 | FOXL2 |
| ZNF638 | SPC24 | PLAUR | CHD2 | NCOA1 |
| CTCF | STK17B | PLXNA2 | ECHDC1 | HMGA1 |
| ELF4 | TCF7L1 | PNP | FAM210B | MDH2 |
| LMO2 | TFF3 | PRL | NCK2 | EIF5A2 |
| OSTM1 | TSG101 | PRSS1 | SNAP29 | GABPA |
| CCNA2 | TTF2 | PRTN3 | CD79B | HDAC5 |
| CKS2 | YY1 | PSMG1 | SPRR1B | PPL |
| DLGAP5 | ZFAS1 | PSPH | RSPH9 | RSF1 |
| FADS1 | ZNF367 | PTCRA | CAMSAP3 | ANXA10 |
| HNRNPA2B1 | LNPEP | PTGS1 | ERP44 | CDC42EP3 |
| PDCD5 | PBRM1 | PTGS2 | CAMKK1 | CEBPD |
| PHLDA1 | TUBB3 | PTN | CASTOR1 | GPX2 |
| SOX7 | PAK3 | PTPMT1 | DDX59 | GSTP1 |
| HCRT | CENPE | PTPRC | GASK1B | IGFBP5 |
| EGR2 | HMMR | QKI | GIT2 | MXI1 |
| MYO5B | RAD51C | RAB18 | GPR19 | THBS1 |
| SOCS4 | ADGRG6 | RAG2 | MIPEP | TIMM8A |
| TRAF6 | CALM1 | RBMS3 | MRPL17 | TMX1 |
| CD80 | CALM2 | REM1 | NINJ1 | TUG1 |
| IL12RB1 | CALM3 | RHOH | P3H3 | UBQLN2 |
| IL27 | ENTPD5 | RIOX1 | RAB15 | ZHX2 |
| IL4R | GSPT1 | ROBO3 | SEC14L3 | PPARD |
| PRKCZ | MAD1L1 | RORC | STK11IP | FABP4 |
| ACTR3 | PSMD10 | RPS20 | TMEM132C | ID3 |
| ADAMTS1 | TEX14 | RRAD | XRN2 | CASK |
| ADH6 | ZWILCH | RTN2 | SNRPD1 | DBI |
| AKAP12 | FGF8 | S100A4 | COL13A1 | EFEMP1 |
| ARNT2 | PKNOX1 | S100A6 | STRN3 | SPINT2 |
| ATF7 | PSMD7 | SAT1 | APLF | IGFBP2 |
| C1QTNF6 | ASCL1 | SCN11A | NTNG2 | NR2C2 |
| CAB39 | ASNS | SCPEP1 | PCMT1 | CCN1 |
| CD36 | CCNB2 | SDC2 | TEF | NF2 |
| COPB2 | CDC6 | SELENOP | DUSP14 | HPGD |
| COPS7A | CDCA3 | SELP | PSORS1C2 | LRP8 |
| DSC2 | CENPF | SERPINA1 | GPX7 | AHSA1 |
| EFNB1 | FEN1 | SERPINE1 | BDH1 | CDCA4 |
| EIF4A1 | GINS4 | SERPING1 | CHORDC1 | CDK8 |
| FBLN1 | HELLS | SERPINH1 | GCSH | F2RL1 |
| FBLN2 | HMGB2 | SFTPC | PGM3 | FA2H |
| GALNT2 | KIF20A | SGCE | RASGRP2 | FANCF |
| HLA-DQB1 | KIF23 | SLA2 | CA5A | FGFBP1 |
| IFNGR1 | KIF2C | SLC25A20 | CACNG2 | FHOD1 |
| IL17D | MYBL2 | SLC7A9 | CCDC88C | GTF2H1 |
| IL1RL1 | NDC80 | SNCA | EMID1 | HSPA4 |
| IRF2 | OIP5 | SOCS3 | MPHOSPH10 | JMJD6 |
| KAT6B | PRC1 | SPP1 | MYL3 | KDM2A |
| KLHL6 | SHCBP1 | SREBF2 | NOL9 | KLF5 |
| KLHL7 | TMPO | SRRM2 | PTPN5 | MYCBP |
| LEF1 | AMD1 | SRY | RAB11FIP1 | SLC2A3 |
| MITF | CDK10 | ST3GAL4 | SEC16B | SLFN12 |
| MYDGF | CTNNA1 | STOML2 | SIGIRR | TUSC2 |
| NDUFB6 | DCP1A | STT3A | TAAR1 | CDH11 |
| NET1 | GOLGA2 | SULT1E1 | ACKR1 | CDH2 |
| PAWR | GSE1 | TAPBP | AFF3 | CDK19 |
| PBX1 | HOXA10 | THBD | ARHGDIG | CLK1 |
| PDCD2 | KANK2 | TLR5 | C10orf88 | CYP24A1 |
| PDHA1 | KDM4A | TLR8 | C1QA | DOK1 |
| PGAP3 | KLF9 | TNFSF13B | CAMLG | EFNA4 |
| PITPNC1 | NASP | TNNT1 | CISD1 | ERBB4 |
| PON2 | SRSF7 | TPI1 | CMC1 | F11R |
| PPME1 | TERF1 | TRIB3 | CPXM1 | FZD1 |
| PPP2CA | VANGL1 | TRIM21 | DUSP23 | FZD7 |
| PRSS23 | MAPRE1 | TRPV4 | EID3 | GFPT1 |
| PTGER4 | NEDD1 | TSPAN33 | EIF2B1 | GPR161 |
| PTPN14 | FGA | UBE3A | ENHO | ILRUN |
| PTPRCAP | RPRM | USF2 | FIG4 | ITCH |
| RBBP6 | ANAPC1 | WNT11 | GJC2 | ITGA6 |
| RHOB | EPGN | GDF3 | GPATCH2 | JPT2 |
| RUFY1 | ADH4 | RUNX3 | KRT2 | KLF4 |
| RUFY3 | AFAP1 | SOX17 | LEPROT | LRP6 |
| SEM1 | AIF1 | TNFSF8 | LOXL3 | MMP11 |
| SEMA3B | ALKBH1 | LPAR3 | MAGEF1 | MTMR3 |
| SEMA4D | ANP32B | SST | MFAP4 | MYLK |
| SERPINE2 | ARHGEF39 | SSTR2 | MRPS18A | NEDD4L |
| SGCB | AURKC | HSF1 | MRPS18C | NRF1 |
| SLCO2A1 | BANF1 | MEG3 | MUSTN1 | PLCD1 |
| SOCS6 | BCAT1 | PDCD1LG2 | NEFM | RAB5A |
| STAT6 | BIRC7 | PPY | NOS1AP | RARB |
| TCF4 | BRINP3 | STK11 | P3H1 | RASAL2 |
| TCF7L2 | BTC | TMED7 | POLR2J | ROR1 |
| TGFB3 | BTG4 | RASSF1 | PPCDC | SRGN |
| TIA1 | CACUL1 | NOTCH4 | PPIL2 | TACSTD2 |
| TOX | CCDC8 | RNH1 | PPP1R15B | TMSB15B |
| UBR2 | CCNY | KLK5 | PRPF3 | TNS3 |
| VASP | CDCA5 | ARID1A | PRR5L | XBP1 |
| EIF3L | CENPO | GSTT1 | RCAN3 | ZNF165 |
| CDC25A | CENPX | CLDN3 | SCN1B | NR2F1 |
| CYP39A1 | CERS6 | FOXA2 | SGCG | PLAGL2 |
| LPP | CHAF1A | SPA17 | SIL1 | SMAD1 |
| ST8SIA4 | CNN2 | APOBEC3B | SLC48A1 | BLCAP |
| MAST2 | COASY | CYP1B1 | SMC6 | ENDOG |
| JAK3 | COP1 | DAPK1 | STX18 | CTTN |
| CCL19 | CREBRF | IMP3 | SUSD4 | DAG1 |
| CSDE1 | CREBZF | KDM6A | TMEM126A | TSPAN31 |
| PAFAH1B3 | CTR9 | NOTCH1 | UBE2E3 | CDK5 |
| PER1 | CXCL14 | CTHRC1 | UCMA | NRG1 |
| AP1G1 | DACT1 | ELAVL3 | USP38 | PJA2 |
| CRABP2 | DONSON | FGF19 | ZDHHC3 | SCG5 |
| KRT13 | E2F3 | GSTM2 | ZNF131 | SLC7A5 |
| PRDX4 | E2F5 | ISYNA1 | DTX2 | STK3 |
| PTPRK | ENOSF1 | PAG1 | NENF | ZNF395 |
| STAMBP | ERCC3 | TNC | KIFC3 | ATF1 |
| COL17A1 | ESCO2 | ATG7 | MOSPD3 | GOLGA5 |
| IRF4 | EXO1 | CSTF2 | TRAF3IP2 | INSL3 |
| INPP5A | FAM83D | DLL1 | RIOK3 | IRS1 |
| PRPF38B | FBXL7 | EMP2 | ACOT13 | MLF1 |
| SLC6A5 | FBXW5 | ERCC1 | GNG11 | MREG |
| EML4 | FHL1 | FGF7 | CNTFR | PPP1R15A |
| TWF1 | FLAD1 | GDE1 | MX2 | RGS4 |
| CHL1 | FOXK2 | GRIK2 | NFS1 | RXRB |
| CHRNA7 | FZD3 | GSTO2 | THAP7 | TMSB10 |
| DSC3 | FZD9 | HDAC9 | ZCCHC8 | UPP1 |
| LCK | G3BP1 | HLA-DMA | PHKG1 | VCAN |
| LINC-PINT | GATA2 | HNF1A-AS1 | RBM43 | WRN |
| MORF4L1 | HMGB3 | HSPA1A | MSANTD3 | TICAM1 |
| MYH10 | HORMAD1 | HSPA1B | FAF2 | ARF3 |
| VDAC3 | HSPA13 | MYOG | GLP2R | HSPA4L |
| ZMAT3 | ILF2 | NFATC1 | GPR85 | HOXA1 |
| ADAM11 | INCENP | NID2 | PRELID3B | LANCL1 |
| CDK14 | INPP5K | NOTCH3 | ATXN10 | PTHLH |
| DCTD | IQGAP3 | PIAS1 | C6orf120 | TRIM25 |
| DLG1 | KIF2A | SGSM3 | CCDC28B | ADCY3 |
| DNAJB6 | KLF11 | SULT1A1 | EMC9 | CARD10 |
| ESD | KLF6 | SYP | GEMIN6 | DLGAP4 |
| SLAMF1 | KMT5A | TARBP2 | HDHD5 | EHMT2 |
| SPTBN1 | KNL1 | TGFBI | MRPS34 | GPAA1 |
| GLRX | KNTC1 | TMSB4X | MSRB2 | HOXA9 |
| NMT1 | LARP7 | TNFRSF12A | NRGN | IL24 |
| GALC | LATS2 | TSC2 | PTCD2 | MECP2 |
| ANKRD11 | LMO4 | XRCC1 | RIPOR1 | NUDT1 |
| DLX4 | MDC1 | ATIC | SEC24B | PDYN |
| IRS2 | MIIP | AMACR | SIDT2 | PER2 |
| LIMS1 | MTSS1 | GALNT14 | STBD1 | PTBP3 |
| MT1X | NAB1 | NQO1 | TCTN3 | SIX1 |
| PDGFRL | NEK3 | SCGB3A1 | TGDS | SLC26A2 |
| PUDP | NR5A2 | ACTB | TMEM223 | SUB1 |
| QPCT | NUCKS1 | EPHX1 | ZBTB25 | TAGLN |
| RAB2A | NUP37 | MAP1LC3B | CABP1 | TCEA1 |
| RBL1 | OGT | SPARC | GNG10 | TGIF2 |
| SEMA4A | PAK5 | TGFBR2 | GNG3 | TM7SF2 |
| TNFSF4 | PAX6 | NRAS | GNG5 | TTC33 |
| MEMO1 | PCDH7 | FOSL1 | GNGT2 | ZFP36 |
| AVPR1A | PDXP | UCP2 | ACER2 | ADORA1 |
| BCL2L2 | PHF8 | AKR1B10 | ACTL6B | RGS2 |
| CACNA1A | PIBF1 | CCDC6 | AGTRAP | ABI1 |
| GABBR1 | PIM2 | COL5A1 | AKAP5 | ADAMTS5 |
| PPP3CA | PIM3 | DUSP6 | ARHGEF26 | ADH7 |
| RIT2 | PKMYT1 | EMSY | ARHGEF3 | ASS1 |
| HPCA | PLK4 | GAPDH | ART3 | ATP4B |
| CNN1 | PLS3 | GSS | ATG101 | AXIN1 |
| MT1H | PMEPA1 | KRT71 | C4orf19 | CCNJ |
| MAGI1 | PPAT | NSMF | CABCOCO1 | CDH3 |
| ALDH9A1 | PPP1R12A | RCN1 | CACNG4 | CELF1 |
| CCNC | PPP2R5E | SERPINB5 | CALML5 | CLCN3 |
| CHI3L2 | PRR11 | SLC12A2 | CALY | DCTPP1 |
| COL3A1 | PSMA1 | SLC12A9 | CAV3 | DHRS11 |
| CRHBP | PSMA7 | SNRPD3 | CCDC186 | DLEU1 |
| ITGB8 | PSMB8 | TFF1 | CIB4 | ELK4 |
| LDHC | PSMC3 | VTN | CKMT2 | FKTN |
| NELL2 | PSMD4 | XDH | CLIP3 | GALNT6 |
| NRK | PTGER3 | AIMP1 | CLPS | GAREM1 |
| PPP1R12C | PTPN9 | ARC | CMBL | GPI |
| STK39 | RAB23 | ATF3 | CRLF2 | GPRC5A |
| USP1 | RANGAP1 | CD248 | CRYGA | HINT1 |
| CALU | RDX | CRISP2 | DBNDD1 | HK2 |
| PCK2 | RPS6 | VAV3 | DCAF11 | HOXB7 |
| RAB11B | SGO1 | ALPL | DCAKD | HSP90AB1 |
| APPBP2 | SNX9 | COL1A1 | DDX25 | ITGA2 |
| OAZ1 | STK24 | SLC20A2 | DHRS7C | JRK |
| PSG1 | SUGT1 | ETV5 | DNAJB12 | KDM3A |
| PTPRN2 | TDG | CHM | DOCK7 | KMT2B |
| SLC18A2 | TFAP2A | VSIR | DTD2 | LAMTOR3 |
| AP1S2 | TMEM8B | DKK1 | ECEL1 | LTA |
| ATOX1 | TNFAIP8L1 | ITGB4 | EVI5L | MPC1 |
| CD84 | TROAP | KIN | FADS3 | NCF2 |
| DHRS7 | TUBGCP5 | PDCD4 | FBLN7 | NME2 |
| DOCK2 | UBE2T | POR | FNBP1 | PDLIM5 |
| ELL2 | UNC5CL | RAB27A | FXYD2 | RABGEF1 |
| GSTA2 | USP22 | TARDBP | GABRA2 | RELN |
| HNMT | USP3 | TNFRSF11B | GABRG1 | SLC16A7 |
| HPRT1 | USP44 | ZEB2 | GP9 | SLC6A6 |
| IL11RA | VCL | LTB4R2 | GPIHBP1 | STC2 |
| NCOR1 | VTA1 | NTSR1 | GPR108 | STX1A |
| NT5C3A | WDR62 | ADORA2B | HESX1 | TBL1X |
| PDCD10 | WNT9A | AKT3 | IGSF5 | TRIM14 |
| PPP1R14A | YEATS4 | CEMIP | IL1RL2 | TRIM23 |
| PRG2 | ZMYM1 | ENPP1 | ILDR2 | TRIM36 |
| PRKACA | ZNF217 | ERO1A | IPPK | TSPAN1 |
| PTGFRN | ZNFX1 | GREM1 | ISL2 | YBX3 |
| PXDN | NEK7 | ITGA9 | KCNMB4 | ZFP36L2 |
| RBM6 | MBD1 | LIMK1 | KCNN1 | ZNF143 |
| SEC23A | NSUN2 | LIPG | KCTD4 | TUBA1B |
| THOC1 | TOP1 | PRRX2 | KIRREL3 | ARAP2 |
| TMBIM4 | CHAF1B | TEAD1 | KNDC1 | CHKA |
| USP12 | CDC42EP4 | TLR1 | KREMEN2 | ELP5 |
| TMEM64 | CDC45 | WIF1 | KRT34 | HIPK3 |
| BEX3 | CDT1 | WNT3 | KRT85 | NLK |
| DCT | CEP135 | C1QBP | LAMP5 | PGRMC2 |
| CYP51A1 | TOP2B | SLPI | LCA5 | BRF2 |
| SOCS5 | CCNA1 | ABCG1 | LRRN3 | ACVR2A |
| AGPAT1 | FXR1 | ACSL4 | LYSMD2 | MFHAS1 |
| CNKSR1 | NIPBL | AHNAK | LYZL4 | FOSL2 |
| IL18BP | RAD17 | AKT2 | MAP7D2 | LSS |
| PRELP | PWP1 | ANXA3 | MB21D2 | SNIP1 |
| SEMA7A | ABCC5 | BTN3A2 | MCOLN2 | ING1 |
| TCEA2 | AJUBA | CPA4 | MGST3 | ATP2A2 |
| TMEM158 | BMP7 | CRABP1 | MRPL10 | CCNL1 |
| TOPBP1 | CUL3 | CRMP1 | MXD3 | FANCL |
| SKAP1 | DCTN3 | DHX40 | MYL7 | HCFC1R1 |
| BDH2 | DDX3X | DKK2 | MYO5C | HEY1 |
| PAPPA | DYNC1H1 | DLL4 | MYOZ1 | PER3 |
| SLC31A2 | DYRK1A | DVL1 | NAT8L | TRIM33 |
| RNF168 | ID2 | ELOVL1 | NCMAP | AFF4 |
| RYBP | NFYA | ELOVL5 | NECAB2 | ATP2A3 |
| IL12B | RAD21 | FABP5 | NFATC2IP | ATP5MC1 |
| EFNB3 | RHPN1 | GGCX | NHSL1 | FJX1 |
| INSL4 | SDCCAG8 | GHR | NHSL2 | GNA13 |
| LIPC | SERPINB3 | GRAP2 | NPR2 | LDOC1 |
| NCKAP1 | SH3BP4 | HOXD13 | NUDT12 | SHMT1 |
| PHACTR2 | SLC38A2 | IGF2BP3 | OCSTAMP | GEMIN4 |
| ROPN1L | SLFN11 | IGKV1-5 | PCOLCE | PCSK6 |
| PPP2R2B | SMARCD1 | IMMP2L | PI4K2B | ZMIZ1 |
| DBT | TUBB4B | INF2 | PIGW | P4HA2 |
| POFUT1 | POLQ | IRAK1 | PLCL2 | MIA2 |
| DIS3 | COL7A1 | KCNH8 | PTGIR | MRTFA |
| CDC37L1 | KNSTRN | LAMA4 | RIPOR2 | NFIX |
| HLA-DRB4 | OVOL1 | LGALS8 | RNF220 | IST1 |
| IL27RA | TAF15 | LGR5 | RRH | SPSB3 |
| SP140 | USP8 | LOXL2 | SEZ6 | AADAC |
| CCNL2 | AATF | MAFK | SIAE | ATP1A1 |
| FEM1B | SPC25 | MAT2B | SLC17A6 | CAPNS1 |
| HEXB | KIF5B | MMAB | SLC25A23 | CDKL3 |
| AMPD3 | TTN | MMP14 | SLC35D3 | CNPY2 |
| CSNK1A1 | ANAPC11 | MTTP | SLIRP | DEPTOR |
| CYB5A | BIRC6 | NOTCH2 | SLITRK1 | IL3 |
| PPOX | CENPP | NTF3 | SMIM3 | PTRH2 |
| RAB43 | PDS5B | OC90 | SNAP91 | RHOF |
| SLC22A5 | PRDM5 | P4HA1 | SPATA24 | SYNJ2BP |
| EVI2A | E2F8 | PARVA | SPATS2L | TSPAN4 |
| RPL7A | MCM4 | PAX5 | TBC1D5 | ZC3H12A |
| HELZ | UBE2S | PDGFRA | THEM5 | ZFHX4 |
| MEF2C | MAP4 | PEX14 | TMEM150A | ANP32A |
| GGA3 | MISP | PHGDH | TMEM160 | HSPE1 |
| HLX | PTP4A1 | PIWIL1 | TMEM161B | N4BP2L1 |
| DNALI1 | ABRAXAS2 | PLIN4 | TMEM86B | SENP5 |
| MOGAT2 | ARL6IP1 | PLXNA1 | TRAPPC12 | SZRD1 |
| POU2AF1 | CAPS | PRKAR1A | TRAPPC3 | WDR77 |
| PTPN18 | CAV2 | PSAT1 | TSR3 | ARHGDIA |
| PWAR5 | CDC34 | PTK7 | TTC1 | ATRN |
| RIN2 | CDR2 | PTPN12 | TTYH3 | FERMT1 |
| SP3 | CEP126 | PTPN22 | U2SURP | ICAM3 |
| SSR3 | LTBP3 | PTPRZ1 | UBN1 | LRIG2 |
| SVIL | LTO1 | RAB25 | UNCX | RALGDS |
| TP53I11 | MAGI2 | RASA4 | UNKL | RGL1 |
| ADAMTS3 | MBD4 | REST | ZDHHC13 | SBNO1 |
| CNKSR2 | NABP1 | SARNP | ZNF2 | SP2 |
| PRKACB | NRDC | SEMA3A | ZNF467 | TRIB1 |
| ATP5ME | PDCD6IP | SFRP1 | ZZEF1 | VOPP1 |
| LRRFIP2 | PDS5A | SIN3B | SPATC1 | XBP1P1 |
| SNX8 | PLRG1 | SLC22A23 | C19orf44 | EZH1 |
| MINK1 | PSME2 | SLC25A16 | CALML4 | RLF |
| AKAP6 | PTTG2 | SLC4A7 | MOBP | TTBK2 |
| ZFP36L1 | RNF113A | SLN | ODF2L | ATP1A2 |
| ERMP1 | TOM1L1 | SMAD7 | IGHA2 | BTN3A1 |
| DNAJA1 | VRK1 | SMURF2 | IGHM | RALGAPB |
| ATP6V0A1 | WASL | SPOP | IGKV3-20 | SLCO4A1 |
| CYBRD1 | MCM3 | SSBP1 | AAMDC | TCEAL9 |
| DDX11 | NOLC1 | ST3GAL6 | AARSD1 | TMEM14A |
| DUSP8 | HRH1 | ST6GAL1 | ABCB8 | NAV3 |
| ERICH1 | KIF3B | TBK1 | ABHD18 | FPGT |
| HIBCH | SLC6A4 | TEX9 | ABHD4 | LARP6 |
| INPP1 | AP4B1 | TFCP2L1 | AGBL3 | CBFA2T2 |
| MPP3 | ANAPC10 | TGFBR3 | AGPAT5 | COPS7B |
| NFYB | BRD8 | THBS2 | AIFM2 | MAP1S |
| PHIP | CDCA2 | THY1 | AIRN | SLC25A11 |
| POLR2F | CETN3 | TINAGL1 | AKIRIN1 | ATP1B1 |
| SLC26A10 | CUL2 | TLN1 | AKR1B15 | CDH15 |
| SLC6A12 | DKC1 | TMEM88 | ALG5 | GNAI1 |
| SPIDR | EPS8 | TRIM13 | ALS2 | PDE10A |
| TAF1C | KCNH5 | TRIP10 | AMIGO1 | PDZD2 |
| CSF2RB | LBR | TUFT1 | AMMECR1L | OSGIN1 |
| MAN1A1 | MAPRE2 | TXNIP | ANKRD24 | PARP2 |
| N4BP1 | MCPH1 | UBAP2 | ANKRD33B | EIF5 |
| GM2A | MPLKIP | UCHL3 | ANKS6 | LYPD1 |
| CIR1 | PAK6 | ULK1 | AP5S1 | FAM8A1 |
| GYPB | PMS1 | UTRN | APLP1 | ARFGAP3 |
| CCL13 | POM121 | WARS2 | AQP11 | BAG5 |
| ITPKB | RAB8A | WWTR1 | ARHGAP45 | BAZ2A |
| PPP2CB | RECQL4 | ZNF326 | ARHGEF18 | CRIM1 |
| LCP2 | SOCS2 | CYP4B1 | ARL3 | ELL |
| POMP | SRSF5 | MMP13 | ARL4D | HBP1 |
| TNFSF18 | STAG1 | AAGAB | ARL6 | HIVEP1 |
| APBA3 | UBE2D3 | CD99 | ARPC5L | IKZF5 |
| CACNA1I | UBE2D1 | COMMD10 | ARRDC2 | LBH |
| CASD1 | SMTN | FOXQ1 | ART4 | LCOR |
| DOCK4 | PNN | HTATIP2 | ASB9 | MCCC2 |
| HLA-DRB5 | NMB | RIN1 | ATL3 | PPP1R8 |
| ITIH2 | BRSK2 | TRPM2 | ATP23 | RB1CC1 |
| KCNK1 | CUL5 | IER3 | ATP6V1D | SCAND1 |
| LRMDA | DCLRE1A | MYBPH | ATP6V1G2 | WDR19 |
| SH2D1A | FBXW11 | FRMD4A | ATPSCKMT | ZBTB18 |
| TEFM | FER | MFAP5 | AVPI1 | ZYX |
| POLR2D | GFI1 | MTA3 | AXDND1 | GNB2 |
| HSD17B10 | MACF1 | NANS | B3GALT1 | ARID4B |
| GNPNAT1 | OPN3 | RBPJ | BCL2L15 | ATP10A |
| KSR2 | SKA2 | SLC44A1 | BET1 | BAZ2B |
| SLC9A6 | TIMELESS | LOXL1 | BHMT2 | ELF1 |
| ALDH3B2 | ITGB3BP | GRK2 | BICDL1 | ETV3 |
| AP3B2 | CUL7 | CNTN1 | BOLA1 | FECH |
| RHOBTB3 | FAM111B | DKK3 | BPIFA3 | FOXD1 |
| TAF10 | JADE1 | HOPX | BTBD11 | GCHFR |
| ZNF507 | ACD | IFT88 | BTF3L4 | GLIPR1 |
| DSCAM | ANAPC16 | MIEF1 | C11orf24 | GOLPH3L |
| ATP6V0B | BBS2 | PDZK1IP1 | C11orf49 | HERPUD1 |
| C3AR1 | CHMP1A | PRDM2 | C11orf52 | HEXIM1 |
| RC3H1 | CHMP1B | RASIP1 | C11orf86 | HSPA6 |
| ACSM2A | CSNK1E | SDF4 | C11orf98 | IFIT5 |
| ALDH8A1 | DNAJB1 | SOX11 | C12orf29 | LCP1 |
| ARPC3 | GABPB1 | AGK | C14orf119 | MEIS2 |
| ASMTL | GPSM2 | ARG2 | C15orf39 | MLPH |
| CEPT1 | HAUS8 | ATG9B | C15orf40 | PLEKHF1 |
| CHRNE | HOXB4 | BMP1 | C16orf72 | POP5 |
| COG6 | ITPR1 | BTG1 | C16orf87 | PSG7 |
| CREBL2 | LIG1 | C14orf93 | C16orf90 | PXMP4 |
| DDX18 | MCM6 | CARD11 | C16orf95 | SENP6 |
| DIPK1A | NEK1 | CCDC80 | C17orf75 | SETD5 |
| ENPP5 | NFIC | CD3D | C19orf18 | SLC1A4 |
| EPS8L1 | NUF2 | CITED1 | C19orf25 | STXBP3 |
| FMO4 | OPTN | CITED2 | C1orf122 | TMF1 |
| GIMAP4 | PLIN3 | EIF1AX | C1orf131 | TSPYL2 |
| GOLGA4 | PSMB6 | EXOSC6 | C1orf35 | WDR48 |
| GTF2H2C | SETDB2 | FAM107B | C1QB | FOXJ3 |
| GTF3C4 | PSMA5 | GAP43 | C1QC | CBLL1 |
| HIBADH | USH1C | GATAD2A | C1RL | OGA |
| KCNA4 | RCC2 | GGCT | C20orf144 | AHNAK2 |
| LINS1 | SELENON | GJB3 | C20orf27 | CLIP2 |
| LRRTM3 | ASF1B | GPX3 | C22orf23 | CSNK1G2 |
| MED17 | CDCA8 | GRB14 | C22orf39 | HMBS |
| MFSD6 | DTYMK | HEMGN | C2orf72 | CTNNBIP1 |
| MGAT2 | GINS1 | LAMB3 | C3orf70 | SERP1 |
| MTMR10 | HJURP | MICA | C4B | CCDC68 |
| NDEL1 | JPT1 | MVD | C5orf47 | TTLL4 |
| NLRP10 | NCAPH | NFIL3 | C5orf63 | PALLD |
| PCDH1 | SMC4 | NOVA1 | C6orf118 | TNFAIP1 |
| PCYT2 | ZWINT | NRARP | C7 | ISOC1 |
| PHF3 | ATRIP | PA2G4 | C7orf31 | MTPAP |
| PLD6 | CCNK | PTPN2 | C8A | PPIF |
| PLPPR3 | PPP2R2A | RASSF5 | C8B | RCBTB1 |
| PPIEL | TTC28 | SDC4 | C8orf82 | SNX6 |
| PPP1CC | DNM2 | SHC3 | C9orf24 | RPS6KC1 |
| PPP3CB | BACH1 | SLC16A2 | C9orf64 | PHF1 |
| PRKAB2 | CDK20 | SLIT2 | C9orf85 | PPAN |
| RABGGTB | CEP57 | SLIT3 | CADM3 | WDFY3 |
| RAP1GAP2 | CEP70 | SMURF1 | CAMK2N2 | ADO |
| RPL23AP7 | CYB5R2 | SNX5 | CAPN5 | ERLIN2 |
| SEC22A | DLG5 | STK4 | CCDC103 | WDR7 |
| SH3D19 | DUSP3 | TAF1 | CCDC124 | CCDC85B |
| SLC25A46 | EIF2S1 | TBX15 | CCDC127 | LSM2 |
| SLC30A5 | EIF4EBP2 | TEK | CCDC198 | RBM39 |
| SLC35B1 | FRS2 | TIAM1 | CCDC47 | AMPH |
| SLC35F5 | GADD45GIP1 | TIMM44 | CCDC57 | ARMCX3 |
| SLC7A6OS | HAUS6 | TIMP4 | CCDC86 | DMTF1 |
| SNAPC3 | HCFC1 | TOMM20 | CCPG1 | GMEB1 |
| SNX17 | HSD17B11 | TSPAN13 | CCSER2 | GSTT2 |
| STAU2 | HSPA1L | VASN | CD2BP2 | HERC4 |
| SYNC | INTS7 | VEGFC | CD72 | LZTS3 |
| TBC1D4 | JMJD1C | YES1 | CDAN1 | NR2F6 |
| UBTD2 | KCNA5 | ZCCHC12 | CDH20 | PARD6A |
| UTP3 | KIF18A | SPINT1 | CDK5RAP1 | PKP4 |
| VDAC1P5 | KIF2B | EVPL | CDPF1 | POGLUT1 |
| ZNF518A | KPNB1 | GTF2IRD1 | CECR2 | PRMT7 |
| BAK1 | LARP1 | MAML2 | CFAP126 | YPEL5 |
| BAX | LZTS2 | SALL3 | CFAP298 | ATP1A4 |
| CASP1 | MAEA | CAP1 | CFAP410 | LARP4 |
| CASP3 | MAP9 | HACD1 | CFAP61 | SSX2IP |
| CASP4 | MCM8 | SORBS1 | CGREF1 | ELOF1 |
| CASP5 | MID1 | UCK2 | CHCHD3 | MORC3 |
| CHMP2A | MNX1 | GPR160 | CHCHD6 | TXN2 |
| CHMP2B | MRI1 | KRIT1 | CHIA | UBAP1 |
| CHMP3 | NCAPD3 | MYOZ2 | CHRNG | GALNT10 |
| CHMP4A | NUP153 | AGO2 | CHST14 | ZNF22 |
| CHMP4B | NUP43 | ALOX5 | CHST5 | PMPCA |
| CHMP4C | OLR1 | APOBEC1 | CIAO1 | ITSN2 |
| CHMP6 | PCNT | CAMKMT | CLCNKB | CAMTA2 |
| CHMP7 | PIF1 | CDA | CLN8 | CNNM4 |
| ELANE | POLA1 | JUP | CLNS1A | MED13L |
| GSDMD | PPP1CB | MSH5 | CLPB | NAA40 |
| GSDME | PPP1R2 | RAP2B | CLPP | SRSF11 |
| GZMB | PPP5C | RLN1 | CNNM2 | ATP2B4 |
| IL1A | PRKAR2B | STK10 | COA3 | NAV2 |
| IL1B | PSMB1 | ZFP64 | COCH | NHLRC2 |
| IRF1 | PSMC6 | ZFPM1 | COG1 | NME7 |
| TP53 | RCBTB2 | SPTLC2 | COL5A3 | PCNX1 |
| TP63 | RCCD1 | PBX2 | COL6A4P1 | RAD54B |
| CASP6 | RIDA | WNT10A | COLEC12 | THAP11 |
| CASP8 | RMI1 | CLEC10A | COPG2IT1 | ZNF277 |
| CASP9 | RNF20 | EBNA1BP2 | COPS4 | GATC |
| GPX4 | RNF40 | REXO1 | COQ10B | ATP8A2 |
| GSDMB | RNPS1 | RPSA | COQ7 | CHTOP |
| GSDMC | SCRIB | DNAJC15 | CRTAM | NDUFS6 |
| NLRC4 | SKA3 | SLC38A1 | CRYAA | TIPARP |
| NLRP1 | SMC3 | APBA2 | CRYBA2 | ZNF84 |
| NLRP2 | SUCLG2 | CD55 | CSNK1G3 | BRD1 |
| NLRP6 | SUN2 | EBAG9 | CSTF3 | DARS2 |
| NLRP7 | SV2B | HSPH1 | CYS1 | FBXL18 |
| NOD1 | TFDP3 | IL11 | CZIB | MRPL24 |
| PLCG1 | TXNDC9 | KDM4B | DAPP1 | NFE2L1 |
| PJVK | ZPR1 | KLF12 | DBIL5P | PI4K2A |
| PYCARD | SLC25A15 | KRT8 | DBX1 | PIGK |
| SCAF11 | WSB1 | POU2F1 | DDX55 | PLXNA3 |
| TINAP | NEIL3 | RHBDF1 | DENND1B | PSG4 |
| TNF | NEUROG1 | TOB1 | DHRS7B | RSL1D1 |
| AIM2 | THRAP3 | TRIM16 | DKKL1 | TASP1 |
| GSDMA | HUS1 | ITPR3 | DMGDH | TMED5 |
| NOD2 | LIPH | RGS18 | DNAAF2 | CLDN14 |
| TIRAP | NUP93 | ANGPTL6 | DNAJA4 | DEAF1 |
| ABL1 | PCM1 | APPL1 | DNAJC17 | DSE |
| ACKR3 | THAP1 | ASIC2 | DNAJC18 | ELOVL6 |
| APEX1 | ARHGEF10 | CA8 | DNAJC22 | ENC1 |
| ATM | PSMD11 | CD247 | DNAJC24 | GLRX5 |
| ATR | TGIF1 | CLDN11 | DNAJC7 | GNAI3 |
| BCL2 | FANCG | CLIC4 | DPEP3 | LCAT |
| BCL2L1 | DNA2 | DOCK6 | DPH5 | MAFF |
| BID | SLC25A36 | EGFL8 | DPM1 | MAFG |
| BRCA1 | CTDSP1 | FEZF1 | DRAP1 | N4BP2L2 |
| BRCA2 | HASPIN | FLNC | DTWD1 | PNRC1 |
| BRD4 | INSIG2 | FRAT1 | DUSP11 | PPP1R3C |
| CD74 | ME3 | GIPC2 | DUSP19 | SLC37A4 |
| CDKN2A | NAE1 | GLDC | EARS2 | SOAT2 |
| CENPJ | OIT3 | GPR155 | ECHDC3 | STAM |
| CXCL12 | PNPT1 | HAS1 | EDEM1 | UAP1L1 |
| EPHA2 | PSRC1 | HMBOX1 | EFCAB1 | UBE2A |
| GIGYF2 | RAD54L | HOXD3 | ELMO2 | UBE2H |
| GML | RUVBL1 | HSD11B2 | EMC2 | GPR107 |
| HMGA2 | TRIM69 | HSD17B7 | EMC8 | AKAP17A |
| HMOX1 | ZNF281 | ICAM2 | ENTPD6 | B3GAT3 |
| HNRNPK | CDKL5 | ITGB6 | EPYC | GJC1 |
| HTRA2 | PRPSAP1 | KMT2C | ERC2 | TRAM2 |
| KAT5 | WEE2 | LMAN2 | ERI1 | CBY1 |
| KDM1A | KCNC4 | MED15 | ETNK1 | IL13RA1 |
| MAPK14 | CDK3 | MZB1 | EXOC3L4 | ARID3B |
| MAPKAPK2 | CENPI | NOC3L | EXOC6B | ATP2B2 |
| MCL1 | ANKLE2 | NTRK2 | EXOSC3 | UGDH |
| MDM2 | PRMT2 | PAX3 | EXOSC7 | N6AMT1 |
| MGMT | TADA3 | PLXND1 | FABP5P1 | SLC5A6 |
| MUC1 | ZNF365 | PRDM16 | FAHD2A | POLR3K |
| NBN | DHFR | RAB31 | FAM114A1 | COA1 |
| NPM1 | ESPL1 | RASSF8 | FAM117B | ZNF354A |
| PARP1 | PHTF2 | RNF180 | FAM151B | FAM102A |
| PLK3 | POLA2 | RNF6 | FAM162B | RNASET2 |
| PMAIP1 | RBM8A | SEMA5A | FAM20A | VAT1 |
| POLD1 | RPL13A | TCAP | FAM217A | ZKSCAN5 |
| S100A9 | TUBB | TSPAN9 | FAM219A | ZNF202 |
| SIRT1 | TUBB2A | VSX1 | FAM220A | ANKRD12 |
| TFAP4 | ADAM22 | WNT6 | FAM228A | ELOA |
| TFDP1 | CAMK2D | ZBTB20 | FAM241B | ARL5A |
| TNFRSF1A | DNAJB4 | COL4A1 | FAM78A | COPS2 |
| ZBTB32 | TPD52L1 | ADAM23 | FAM83G | EXOSC4 |
| MYC | AZI2 | ADAMTS8 | FAM86B2 | HOXD1 |
| AURKA | C4BPB | ADAMTS9 | FAM89A | KLF3 |
| UBB | CHAMP1 | ADH5 | FANCD2OS | PTBP2 |
| SOX4 | CKAP5 | AEBP1 | FARP1 | ADCY8 |
| SNAI2 | CRLS1 | AHRR | FASTKD3 | ATP11A |
| PIK3R1 | DDIAS | AKIP1 | FBXO21 | ATP11C |
| CDKN1B | ELP3 | ANO1 | FBXO25 | B4GALT6 |
| CHEK1 | FBXO7 | AREG | FBXO42 | CA6 |
| FOXM1 | HLA-DRA | ASPN | FCHO1 | FOCAD |
| PLK1 | INO80 | AZIN1 | FCHSD1 | GJD3 |
| CDKN1A | NAA50 | BCL9 | FGD6 | PDSS1 |
| CHEK2 | NDC1 | C4BPA | FGFBP3 | PIGO |
| PCBP4 | NEK4 | CBS | FHAD1 | RHOQ |
| BOK | NKTR | CCDC125 | FLVCR2 | SLC18A1 |
| CBX8 | POLK | CCDC134 | FLYWCH2 | TTPAL |
| CCAR2 | SHTN1 | CCN3 | FMC1 | ZNF442 |
| CD44 | TDP1 | CD8B | FNDC4 | MPPE1 |
| MLH1 | TRIM45 | CLDN2 | FNDC8 | PPP1R7 |
| MSH2 | TRIM71 | CMTM3 | FNTA | ATP11B |
| USP28 | TSN | CMTM6 | FRA10AC1 | SPSB1 |
| MSH6 | TUBA4A | COL10A1 | FXYD7 | CBR3 |
| CDK2 | USP17L2 | COL11A1 | GABRA5 | PRRG4 |
| MIF | PSMC5 | COL12A1 | GALNTL6 | SNU13 |
| PLK2 | PHOX2B | COL1A2 | GAPT | AK2 |
| NUPR1 | DIS3L2 | COL5A2 | GFRA4 | BTN2A1 |
| TPT1 | ARHGAP42 | COL6A3 | GGTA2P | ITSN1 |
| ANTXR1 | LUC7L3 | CPEB1 | GIMAP1 | MKLN1 |
| MRE11 | NIN | CPXM2 | GINM1 | MPZL2 |
| CCNB1 | SAPCD2 | CST6 | GKAP1 | RETREG2 |
| CDK1 | TICRR | CSTB | GMIP | UBTF |
| E2F1 | UBE2E2 | CTBP1 | GNB1L | ZSCAN31 |
| FANCI | TUBGCP3 | CTBP2 | GNL1 | HIC2 |
| FBXO5 | RDH11 | CXCR5 | GNPDA1 | SLC38A6 |
| GTSE1 | TNPO1 | CXXC1 | GOLGA7 | ARFGEF2 |
| BCL2A1 | UBE2J2 | DCBLD2 | GRHPR | DERA |
| BRCC3 | GPR132 | DDAH1 | GRIK5 | MRPL40 |
| EP300 | MRPL19 | DDX21 | GRIN2D | NREP |
| RFC3 | PPP1R12B | DDX6 | GTF2IRD2 | SYNPO |
| RPA1 | RANBP2 | DESI2 | GUCY1B2 | ACBD3 |
| TNFRSF1B | PLCB1 | DIXDC1 | GYG1 | AGO3 |
| BAD | AFDN | DLL3 | GZMH | AP2A2 |
| BTG2 | CEP131 | DMAP1 | HACD4 | ATP2B3 |
| CDC25C | CNIH4 | DTX1 | HCN3 | ATP2C2 |
| CNOT9 | CSGALNACT1 | EBF3 | HDHD2 | CSTF1 |
| FOXO3 | DBF4B | EFNA2 | HEMK1 | HIVEP2 |
| PML | DSCC1 | EFS | HERC6 | INAVA |
| SMC1A | FAN1 | EIF3A | HEXIM2 | IQCC |
| TP73 | GINS3 | EIF3D | HHATL | KIF3C |
| WNT1 | KATNB1 | EIF6 | HMCES | MEGF9 |
| ANKRD1 | MRPL36 | EPHB3 | HMG20A | NRBF2 |
| BABAM1 | MYO16 | ETV4 | HMGCL | SLC12A7 |
| BABAM2 | NME6 | FADS2 | HMGN3 | STX3 |
| BCL2L12 | ORC6 | FBXO32 | HS3ST1 | TCF20 |
| CLU | PPP2R1B | FBXO8 | HSD17B7P2 | THAP10 |
| DDX5 | SAC3D1 | FGF18 | HSD3B7 | TRMT12 |
| DYRK2 | CENPM | FSTL1 | HSPB11 | USPL1 |
| EYA3 | SMC5 | FTO | HSPBP1 | SF1 |
| FOXO4 | PID1 | FUBP1 | IDI1 | EN1 |
| H2AX | PSMB10 | GEMIN2 | IER3IP1 | EFHD2 |
| HIC1 | PSMB4 | GJB4 | IFI35 | WDCP |
| IKBKE | SRSF10 | GKN1 | IFT27 | CLCF1 |
| ING2 | TENT4A | GNAT1 | IFT43 | AK1 |
| RNF8 | ZNF268 | GPC4 | IGHD | GABBR2 |
| SFRP2 | SS18 | GSTZ1 | IGHG2 | TIMM10 |
| SNAI1 | CCNF | GTF2A1 | IGHG4 | ADAT1 |
| UBE2B | KIF18B | GTPBP4 | IGHV1OR21-1 | DNAJB14 |
| UIMC1 | ARPP19 | HIKESHI | IGHV2-70 | GPR3 |
| DDIT4 | CYTH2 | HNRNPDL | IGHV4OR15-8 | PRRC1 |
| POLD2 | PPP2R2D | ICOS | IGKV1D-33 | TM7SF3 |
| RBX1 | WDR76 | IFRD1 | IGKV2-40 | ADNP2 |
| PRKDC | ZNF24 | IL17RA | IGKV3D-11 | ALG6 |
| PRKCD | RAB3A | IPO4 | IGKV3D-20 | ALG8 |
| HIPK2 | DNAJC6 | IRGM | IGKV4-1 | ARSJ |
| RGCC | CDC16 | KCNH2 | IGLC1 | ATP6V0E2 |
| BLM | CDC26 | KDM5D | IGLC2 | ATP6V1B2 |
| CRIP1 | ACTR1A | KDM7A | IGLC3 | ATP9A |
| PLA2R1 | B4GALT1 | KIF26B | IGLC6 | BAHD1 |
| RFWD3 | BTBD3 | KLF16 | IGLC7 | BRWD1 |
| CDKN2D | CDC123 | KRT1 | IGLL1 | BSCL2 |
| DTL | CENPW | LIF | IGLL5 | BSDC1 |
| RPA3 | CKAP2L | LYPD5 | IGLV7-43 | C11orf71 |
| FBXO31 | CLIP1 | MAML3 | IKBIP | C1orf112 |
| MSX1 | CYTH3 | MAP3K20 | ILVBL | C3orf52 |
| SYF2 | DNAJC3 | MARVELD2 | INAFM1 | CCDC15 |
| ING4 | DSN1 | MFSD2A | INSM2 | CCNT2 |
| MYO6 | ERN2 | MICB | IQCH | CDK17 |
| PLAGL1 | FAM189B | MMP10 | IZUMO3 | CHIC2 |
| SFN | FAM72B | MOS | JPH2 | CLCN6 |
| UBA52 | HAUS3 | MRPL33 | KCNAB3 | CLK4 |
| USP10 | HECA | MSI2 | KCNE3 | COX16 |
| BCL2L10 | INTS3 | MTAP | KCNK16 | CSNK1G1 |
| BCL2L11 | INTS8 | MUC13 | KCNQ4 | DENND4C |
| CDK5RAP3 | KIF4B | MUS81 | KDELR2 | DHRS1 |
| CLSPN | KLHL21 | MYCL | KDELR3 | DOLK |
| CUL4A | LIN52 | MYT1L | KEL | DPM2 |
| CUL4B | LIX1L | NBAS | KERA | DPM3 |
| ERCC6 | MAD2L1BP | NDRG4 | KIAA0040 | DPY19L1 |
| ERCC8 | MAN1A2 | NEIL1 | KIAA0895L | EEF1AKMT3 |
| EYA1 | MARK4 | NMI | KLHDC8A | ERG28 |
| FZR1 | MATN2 | NPTX1 | KLHL8 | ERLIN1 |
| HIPK1 | MRPS18B | NQO2 | KNOP1 | FAM189A2 |
| MAEL | NABP2 | NTHL1 | KRT78 | FAM86B1 |
| POLB | NUP155 | NUAK2 | KRT84 | FBXL12 |
| RBBP8 | NUP88 | OLFML2B | L3HYPDH | FBXO38 |
| RFC1 | ORC1 | OSMR | LBHD1 | FEM1C |
| RIF1 | PCNAP1 | PAIP1 | LCE1D | IBTK |
| SLC19A1 | PPP1R9B | PCDH8 | LCE2B | INTS5 |
| TAOK2 | PSMA6 | PDRG1 | LCN10 | INTS9 |
| TIGAR | PSMB2 | PHF10 | LEAP2 | IQCB1 |
| TRIM28 | PSMG2 | PIK3AP1 | LENEP | ISOC2 |
| TRIM32 | RAE1 | PNMT | LENG9 | KCTD14 |
| USP47 | SLBP | POU2F2 | LHFPL3 | KHNYN |
| XPA | SNHG10 | PPBP | LIAS | KLHL24 |
| CNOT7 | SOGA1 | PPFIA3 | LILRB3 | LAGE3 |
| CNOT8 | TMOD3 | PTGR1 | LLCFC1 | LHFPL2 |
| IFI16 | TOB2 | PTPRG | LMBRD1 | LUC7L |
| E2F7 | TRAIP | PTX3 | LMNTD1 | MKRN1 |
| RBL2 | TREX1 | RAB22A | LRCH3 | MYO9A |
| DDB1 | TRIM35 | RAB3IP | LRR1 | PEX11B |
| POLD3 | UACA | RABEP1 | LRRC15 | PIGC |
| ARTN | UBA3 | RAI14 | LRRC27 | POLR2I |
| FGF10 | USP16 | RASSF7 | LRRC3 | POLR2L |
| RAD18 | VPS4A | RBM47 | LRRC46 | PSG6 |
| CNOT6 | WIPF2 | RNF138 | LRRIQ4 | PTDSS1 |
| RFC4 | XPO4 | ROCK2 | LUC7L2 | R3HCC1L |
| RFC2 | ZMYND19 | RPL10 | LURAP1L | RAB29 |
| MAD2L2 | ENSA | RPS12 | LY6G6E | RABGAP1 |
| MOAP1 | RNASE7 | RSRC1 | LYPD2 | RBM48 |
| PHLDA3 | DEPDC7 | RTKN | LYSMD3 | RPL38 |
| E2F4 | ANKRD17 | S100A14 | MAGOHB | RRAGA |
| PIDD1 | CENPN | SEMA3E | MCFD2 | RRAGC |
| NKX3-1 | PPP2R5A | SETD7 | MED10 | RRAGD |
| SKIL | CNTROB | SEZ6L2 | MED26 | SFSWAP |
| BCLAF1 | RNF126 | SHMT2 | MED6 | SLC25A38 |
| POLD4 | DCTN1 | SLC17A9 | MEP1B | SNRNP25 |
| TAOK3 | ZNF521 | SLC1A2 | METAP1 | SPTSSA |
| USP32 | CPNE8 | SLC22A16 | METRN | SRSF8 |
| SNW1 | ZNF593 | SLC23A2 | METTL21A | TBC1D2 |
| CASP2 | DHX8 | SLC52A2 | METTL5 | TBC1D2B |
| CRADD | TK2 | SLC8A1 | MFNG | TCTA |
| CNOT2 | KANSL1 | SND1 | MFSD5 | THYN1 |
| GRB2 | WDR43 | SNHG20 | MICOS13 | TJAP1 |
| RBM38 | AKAP8 | SNX1 | MID1IP1 | TMEM80 |
| RPS6KA6 | CSNK1D | SOX1 | MMACHC | TOR3A |
| FNIP2 | NDE1 | SPPL2A | MOCOS | TSEN2 |
| NPAS2 | PHF13 | SRCIN1 | MORN1 | TXNL4B |
| ARID3A | DYNC1I2 | STAMBPL1 | MRM1 | UBXN7 |
| UBC | ZC3H12D | STK33 | MRNIP | UPF2 |
| FOXN3 | RRP1B | TCF21 | MRPL15 | UPF3B |
| RAD9A | ANAPC7 | TEAD4 | MRPL18 | UQCR10 |
| CARM1 | CEP78 | TES | MRPL49 | VCPKMT |
| CDC5L | CCNB3 | THEG | MRPS12 | WBP4 |
| DGKZ | ORC2 | TINF2 | MRPS31 | WDR47 |
| RPS27A | SEPHS1 | TMEM41A | MS4A10 | WDR5B |
| TRIAP1 | ZSCAN5A | TNFRSF4 | MTERF4 | ZBED8 |
| CRY1 | ANAPC4 | TNIP1 | MTIF2 | ZBTB43 |
| DDX39B | B9D2 | TRIM3 | MTMR9 | ZC3H7A |
| DEPDC1B | CADPS | TWIST2 | MTX2 | ZMYM5 |
| KDM4D | CDC14A | TWSG1 | MVB12B | ZNF140 |
| NEK6 | CDH24 | UBA2 | MXRA7 | ZNF174 |
| NSMCE1 | CKAP2 | UBQLN1 | MYL6 | ZNF212 |
| RNASEH2B | L3MBTL1 | UFM1 | MYMK | ZNF239 |
| SERPINA2 | NUP210 | ULBP1 | MYO1H | ZNF282 |
| SPRED1 | PRR5 | USP14 | MYOM1 | ZNF83 |
| SPRED2 | PSMA2 | VAV1 | NAA30 | GMFB |
| TOPORS | PSMA8 | VAV2 | NADK2 | ABHD14A |
| PPP2R5C | PSMC2 | VPS37A | NATD1 | ABHD3 |
| CDC14B | SNRPB2 | VPS50 | NCBP3 | ABTB2 |
| PIAS4 | SORL1 | WDR5 | NCLN | ADCY7 |
| BATF | SPIN3 | ZBTB4 | NDFIP2 | AGBL5 |
| CNOT3 | TMEM140 | ZC3H13 | NDOR1 | AP1AR |
| BAG6 | TRIOBP | ZFPL1 | NDUFAF7 | ARHGAP12 |
| EEF1E1 | TSKU | ZNF3 | NFU1 | ARMCX2 |
| RPS3 | USP6NL | ZNRD1ASP | NIP7 | ARMCX6 |
| ST20 | FBXL20 | ANKRD22 | NKAIN4 | ASTE1 |
| MRPS28 | STOX1 | DCXR | NKIRAS1 | ATP10D |
| PNKP | ZNHIT2 | ZIC4 | NKX1-2 | ATP1B3 |
| CNOT4 | PSMA3 | PLEK2 | NMNAT3 | ATP8B3 |
| MRPS11 | PPP1R1C | ABCG8 | NMT2 | ATP8B4 |
| PRPF19 | PSMC1 | RNF125 | NRDE2 | ATP9B |
| TAF9 | RMI2 | TENM4 | NRXN1 | BCL7C |
| CNOT1 | WAPL | CR1 | NSMCE3 | BPGM |
| PAXIP1 | NUP107 | SSBP2 | NT5DC2 | BTN2A2 |
| THOC5 | TMCC1 | TPD52 | NTN3 | C1orf216 |
| BRSK1 | CRLF3 | NCR1 | NUDT14 | C6orf89 |
| SETMAR | ZRANB2 | UCHL5 | NUDT16L1 | C9orf40 |
| RPA2 | ABCA7 | MMP23B | NUDT19 | CCDC28A |
| RINT1 | DYNLT3 | MACROD2 | NUDT7 | CDR2L |
| ABRAXAS1 | KATNA1 | ASPH | NXPH3 | CEP112 |
| PLK5 | ADM5 | PLXDC2 | OCEL1 | CHST2 |
| CNRIP1 | PMF1 | ITGA7 | OGFOD3 | CLN6 |
| RPS27L | ANKRD18A | ASAP1 | OR10J5 | CMC4 |
| WAC | CCP110 | ATG4B | OR2A7 | CNIH3 |
| NEK11 | CTDP1 | CXCL6 | OR2S2 | COA4 |
| TAOK1 | GOLT1A | PGPEP1 | OR51B2 | CSGALNACT2 |
| CEP63 | HMG20B | INPP5D | OR51B6 | CSTF2T |
| RFC5 | MTURN | GCC1 | OR56A5 | DCAF8 |
| CEBPG | NUP205 | NAB2 | ORMDL1 | DHX34 |
| APBB1 | NUP58 | NMU | OSBPL3 | DNAJB2 |
| FBH1 | VCPIP1 | ATG2B | OSBPL9 | DNPH1 |
| NFATC4 | ZCCHC10 | BCL11B | OSGEPL1 | EEF2KMT |
| UBE2V2 | ZW10 | CSTA | OSTC | EID1 |
| TNKS1BP1 | AOC2 | DOCK5 | PACRGL | ETFB |
| REXO2 | PARP3 | DSPP | PACSIN1 | EXOG |
| LRIF1 | CETN2 | DST | PACSIN2 | FAM169A |
| PGAP2 | HTT | KRT16 | PACSIN3 | FAM53C |
| TMEM109 | PSMD3 | MYO1B | PATE4 | FARSA |
| CNOT10 | RAD1 | P2RX1 | PBX2P1 | FICD |
| CNOT11 | GNB1 | PLEC | PCDH12 | FMO1 |
| CNOT6L | ANK3 | SELENBP1 | PCDHGB4 | FNBP4 |
| SP100 | ARGLU1 | SH3KBP1 | PCGF5 | FNTB |
| ZNF385A | BIRC8 | WNT5B | PCGF6 | GK |
| AEN | BOD1 | ACTA1 | PCNX4 | GMEB2 |
| CDIP1 | CUL9 | CHP1 | PDIA5 | GPATCH3 |
| CIDEB | DMXL2 | CKMT1B | PEX3 | GPATCH8 |
| ELL3 | DRD3 | CYP26A1 | PEX7 | GPBP1L1 |
| INGX | EIF2A | EXT1 | PFKFB1 | GPR137B |
| INSL6 | KLHL22 | FBXO4 | PFN4 | GPR176 |
| MRPS26 | KMT5B | GZMM | PGLYRP1 | GPRC5B |
| MRPS35 | MTPN | IVL | PGM2 | GTF3C2 |
| MRPS9 | NANOS1 | MAML1 | PHACTR1 | GTPBP2 |
| NACC2 | NSMCE2 | NCOR2 | PHKA1 | HDDC2 |
| NSMCE4A | NUP214 | P2RX3 | PHKA2 | HS1BP3 |
| NUDT16 | PRIM1 | P2RX4 | PHYHD1 | IFRD2 |
| POLR1A | PRIM2 | P2RX6 | PHYKPL | INPP5E |
| POLR1B | RHNO1 | PBXIP1 | PIGM | KIAA1549L |
| PRKCG | SLC25A27 | TALDO1 | PIGP | KPNA5 |
| SHISA5 | TTYH1 | TBP | PIGQ | LCMT2 |
| SLF1 | TUBG1 | TENM2 | PIN4 | LINC01963 |
| SLF2 | USP37 | TRAF4 | PIP4P2 | MANSC1 |
| TAF9B | VPS4B | KYNU | PITX3 | MDFIC |
| TMEM161A | STAG3L1 | PTPRD | PLA2G2E | MEAK7 |
| PARP | POLE2 | RMDN3 | PLBD2 | METTL18 |
| AIFM1 | MORF4L2 | CFDP1 | PLD3 | MGST2 |
| HSP70 | NSUN3 | CDK16 | PLEKHA3 | MPHOSPH9 |
| PAAN | LIN54 | FAM114A2 | PLEKHB2 | MRPL34 |
| ARH3 | DBF4 | KPNA4 | PLET1 | MRPL57 |
| RNF146 | SPDL1 | PPP1R11 | PLSCR3 | MRPS14 |
| ADPRHL2 | ANKRD10 | RMDN1 | PMFBP1 | MTMR1 |
| OGG1 | BIN3 | RSPO1 | PMVK | MYT1 |
| PGAM5 | CDKN2AIP | SERPINB9 | POLR1E | NDUFA3 |
| KEAP1 | DCTN2 | SPRR1A | POLR3GL | NDUFA7 |
| AIRE | DYNC1LI1 | TP53RK | POU5F2 | NFRKB |
| NRF2 | HINFP | UBA5 | PPIC | NHP2 |
| MMP1 | OSER1 | NID1 | PPM1M | NPIPA1 |
| MPO | PHTF1 | DEFB1 | PPP1R3F | OSBPL2 |
| CAMP | PPP2R5B | PGRMC1 | PPP3R2 | PCYOX1L |
| PADI4 | PRR16 | CITED4 | PREB | PELO |
| EIPA | TUBA1A | STK32B | PRELID2 | PLEKHO2 |
| NCX1 | USB1 | APOM | PRICKLE2 | PLGRKT |
| MIA | DYNLT1 | COBL | PRSS36 | PNISR |
| ACOD1 | KCTD9 | NEB | PRSS41 | PRDM10 |
| ADAM17 | PATJ | POU3F2 | PRSS44P | PRRC2B |
| AGFG1 | SVIP | BTN3A3 | PTCD1 | PWP2 |
| AKT1 | TUBB4A | LRRC8D | PTER | PXMP2 |
| ATF2 | AP3D1 | MORN5 | PTPN21 | PYCR3 |
| BRAF | CLTCL1 | MS4A3 | PUS3 | RAB8B |
| BTK | POMZP3 | NFYC | RAB3C | RANBP6 |
| CAD | ANAPC2 | NPAS3 | RASGEF1C | RMND5A |
| CAV1 | ANAPC5 | PARN | RBM18 | RNF103 |
| CHUK | FBXO43 | PDIA6 | RBM20 | RNF19B |
| CREB1 | UBE2E1 | SH2B3 | RBM34 | RNF44 |
| CXCL8 | IGHA1 | TRIM15 | RBMS1 | RNFT2 |
| EGF | ABHD10 | TRIM26 | RBPJL | RSAD1 |
| EPHB2 | ACTR8 | KLF10 | RESP18 | RTL6 |
| EZR | ACYP1 | DGKA | RETSAT | RWDD2A |
| FAIM2 | ADCK2 | CSRP1 | RFLNA | SEC24A |
| FAS | ADCY6 | GPRC5C | RFLNB | SLC35B3 |
| FASLG | ADGB | GRHL1 | RFNG | SLC43A3 |
| FASN | AGPAT3 | LMOD1 | RFX4 | SMARCD2 |
| FOS | AHCTF1 | PYGO2 | RGS7 | SMCO4 |
| HSPB1 | AKAP8L | RND3 | RGS7BP | SMIM29 |
| IKBKG | ALMS1 | WDR1 | RHBG | SNN |
| JUN | ANAPC13 | ACP6 | RILPL1 | SREK1 |
| MAP2K7 | ANAPC15 | AMDHD1 | RIMS1 | STX10 |
| MAPK1 | ANGEL2 | ATP1B2 | RINL | STX5 |
| MAPK3 | ANKRD36 | BTF3P11 | RMND5B | SYNGR3 |
| MAPK8 | ANKRD40 | CACNA1C | RNASEH1P1 | TBC1D15 |
| MAX | ARHGAP11B | CCDC34 | RNF122 | TBC1D17 |
| NFKB1 | ARHGAP19 | CD3E | RNF151 | TCEA1P2 |
| NFKB2 | ARL4A | CHRNA6 | RNF165 | THTPA |
| NFKBIA | ARL8A | CRCT1 | RNF208 | TIMM8B |
| PAK1 | ARMC1 | CTNND2 | ROGDI | TMEM177 |
| PIK3CA | ASPHD2 | DCK | RP2 | TMEM251 |
| PIK3CB | ATL2 | DHRS2 | RPAP3 | TMEM39A |
| PIK3CD | ATXN1L | DRG1 | RPF2 | TMX4 |
| PRKCB | AURKAIP1 | DVL2 | RPP21 | TRMT2B |
| PSEN1 | BAIAP2 | DVL3 | RPP30 | TVP23B |
| RAF1 | BBS4 | EYA4 | RPTN | UBXN8 |
| RASA1 | BIVM | FBXW4 | RSL24D1 | UROS |
| RB1 | BOD1L2 | FGFRL1 | RWDD1 | USP36 |
| RELA | BORA | GCH1 | S100A11P1 | VSIG2 |
| RIPK1 | BRINP2 | HECTD3 | S100G | YLPM1 |
| RNASE1 | BTNL9 | IL15RA | SAMD8 | YRDC |
| RPS6KA1 | C2orf69 | KRT4 | SAPCD1 | ZBTB14 |
| SHC1 | C3orf62 | MYL9 | SCAMP5 | ZBTB40 |
| SMPD1 | C4A | NECTIN2 | SCAPER | ZDHHC4 |
| SP1 | C5orf49 | NFATC2 | SCNM1 | ZMYM3 |
| TAB1 | CAMK2G | NKX2-8 | SDHAF3 | ZNF112 |
| TAB2 | CAPN7 | NUMB | SDR39U1 | ZNF254 |
| TGFB1 | CCDC107 | OPRPN | SEC24D | ZNF274 |
| TNFAIP3 | CCDC14 | POLM | SEC61B | ZNF322P1 |
| TNFRSF25 | CCDC150 | RAB10 | SEMA5B | ZNF426 |
| TNFRSF6B | CCDC180 | RAB3D | SEMA6C | ZNF512B |
| TNFSF10 | CCDC90B | RABGAP1L | SERINC3 | ZNF557 |
| TXN | CCSAP | RASGRP3 | SERP2 | AGER |
| PTPN13 | CDC42EP1 | RRAS2 | SERPINB12 | CRX |
| RNASE3 | CDK5RAP2 | RTRAF | SERPINB8 | GFAP |
| PTK2 | CENPC | TCEAL1 | SGF29 | KAT8 |
| TGFB2 | CENPL | TGFB1I1 | SH2D1B | LEP |
| HDAC3 | CENPQ | THUMPD2 | SH2D4B | MEFV |
| CEBPA | CENPS | TMEM176A | SH3BGR | RIMS2 |
| DEDD | CENPT | TPM2 | SH3BP5L | TP53INP2 |
| ELK1 | CENPV | TTC17 | SH3YL1 | TPCN2 |
| GSN | CEP152 | TUSC3 | SHD | UCHL1 |
| LMNA | CEP164 | UBE2K | SHISA9 | U2AF1 |
| NUMA1 | CEP192 | ZAP70 | SHISAL1 | FGF23 |
| TGFBR1 | CEP290 | CELSR3 | SHISAL2B | CDK5R1 |
| MAP3K1 | CEP350 | LYPD3 | SHKBP1 | EEF1A1 |
| ACTG1 | CEP41 | TNFSF9 | SLAMF6 | DAP |
| CYLD | CEP57L1 | ADAM15 | SLC16A13 | DAPK2 |
| MAP3K7 | CEP76 | BMP5 | SLC23A1 | FOXO1 |
| RALBP1 | CEP85 | CMTM5 | SLC25A14 | FZD5 |
| DFFB | CHML | COX7A2L | SLC25A30 | HCP5 |
| PIK3R3 | CLASP1 | EGFL6 | SLC25A53 | LEPR |
| MAPK13 | CNEP1R1 | FETUB | SLC35E3 | LZTS1 |
| TPX2 | CNTRL | HGD | SLC35F4 | TRIM65 |
| BIRC2 | COQ9 | LIN7C | SLC4A1AP | CDH6 |
| BIRC3 | CPLANE1 | MYO5A | SLC9A2 | PDK1 |
| MAP2K1 | CRYBA1 | NNAT | SLCO1C1 | TPCN1 |
| MAPK7 | CTDNEP1 | ADAM28 | SLX1B | VCP |
| PRKCA | CTDSP2 | ART1 | SLX4IP | GATA4 |
| RPS6KA2 | DCAF16 | AUNIP | SMG9 | ATG12 |
| DIABLO | DCAF7 | DCAF4 | SMIM12 | ATG4A |
| XIAP | DCUN1D3 | FILIP1L | SMIM15 | ATP6V1A |
| SRC | DDX12P | GJB5 | SMIM20 | CISD2 |
| CDK11B | DET1 | GRB10 | SMIM23 | FBXL2 |
| KCNH4 | DEXI | GSTA4 | SMIM8 | FEZ1 |
| MAP2K5 | DHFR2 | GTF2E2 | SNAPC1 | MAPT |
| MAP3K11 | DHFRP1 | HAS2 | SNORA64 | PGK1 |
| MAP3K2 | DNAJB9 | ICAM5 | SNORC | PIK3R4 |
| MAPK8IP2 | DUSP12 | LTBP4 | SNORD55 | PRXL2C |
| MAPK9 | DYNC1LI2 | LYNX1 | SNRPD2 | RAB3GAP2 |
| MKNK1 | DZIP3 | MAP2 | SNX24 | REV3L |
| NR0B2 | E4F1 | METAP2 | SNX7 | SH3GLB1 |
| RAC1 | EFHC1 | MGST1 | SOBP | TP53INP1 |
| RACK1 | EML1 | NCK1 | SORCS2 | UBQLN4 |
| SQSTM1 | EXTL2 | NFATC3 | SP5 | USP33 |
| TNFSF12 | FAM110A | NPRL2 | SPACA1 | WBP11 |
| TNIK | FBXL15 | ONECUT1 | SPATA17 | SREBF1 |
| APAF1 | FIGN | OTUD4 | SPECC1L | GUK1 |
| PSEN2 | G2E3 | PDE3A | SPEF1 | HAX1 |
| FADD | GABPAP | PGP | SPEM1 | ACTL6A |
| PRKCQ | GAS2L1 | PKP2 | SPINK9 | CYP21A2 |
| MAP3K8 | GAS2L3 | PSENEN | SPOPL | DIRAS1 |
| ARAF | GBF1 | PSTPIP1 | SPRYD7 | LETM2 |
| CASP10 | GOLGA6L5P | RALA | SRPK3 | PINK1 |
| ETFA | GOLGA8A | SLK | SRRD | TAB3 |
| GDNF | GOLGA8B | SMAD6 | SSB | EXOC4 |
| MADD | GOLT1B | SOS2 | SSU72 | GSK3A |
| MAP4K4 | GON7 | SPAM1 | STAC | HCAR2 |
| MAPK4 | GRPEL1 | TBX20 | STIMATE | RAB3GAP1 |
| PDPK1 | GTPBP8 | TCF19 | STK19B | ACAT2 |
| CFLAR | HAUS1 | TMC5 | STRADA | IAPP |
| TRAF2 | HAUS2 | UBA1 | STX12 | VMP1 |
| ETS2 | HAUS4 | UCN3 | STX4 | AMBRA1 |
| MEF2D | HAUS5 | CDYL | SUDS3 | LAMB1 |
| RPS6KB2 | HAUS7 | COL22A1 | SURF2 | SNRNP70 |
| BAG4 | HEPACAM2 | DAD1 | SYNPO2L | TLK2 |
| NFKBIB | HERPUD2 | RAB38 | SYPL2 | TRIM8 |
| PRKCH | HINT3 | ADGRV1 | SYTL1 | USP9Y |
| PRKCI | HP1BP3 | FMOD | TAS1R2 | ZKSCAN3 |
| CASP7 | HPS4 | PIK3IP1 | TBC1D1 | CPS1 |
| IKBKB | HS2ST1 | SETDB1 | TBC1D8B | PROK2 |
| ARHGDIB | HUS1B | SLC44A4 | TBCD | SCOC |
| FAF1 | IDI2 | SRRM4 | TCEANC2 | EIF2AK4 |
| MAP3K5 | JADE2 | TAP2 | TEAD3 | TBC1D25 |
| MAP4K1 | KAT14 | CYP27A1 | TECTA | TFAP2C |
| MAPK8IP1 | KATNBL1 | SPHKAP | TEPP | DRAM2 |
| ROCK1 | KBTBD2 | ARX | TEPSIN | TRIM22 |
| SPTAN1 | KCTD2 | QRSL1 | TEX2 | U2AF2 |
| TNFRSF10A | KIAA0586 | HSD17B3 | TEX261 | EPM2A |
| MAP2K4 | KIAA1586 | PDXDC1 | TEX30 | P2RY13 |
| MAP2K2 | KIF25 | RYR1 | TIMM21 | SNX32 |
| MAPK10 | KIFC2 | SYNE2 | TM4SF20 | EXOC7 |
| MAP3K13 | KLHDC9 | CSMD3 | TMCC2 | EXOC1 |
| PFN2 | KLHL13 | ELOC | TMEM123 | LRSAM1 |
| MAP3K4 | KLHL42 | MLLT10 | TMEM126B | RNF5 |
| MAP3K9 | KLHL9 | PNKD | TMEM163 | ZKSCAN4 |
| PIK3R2 | LCMT1 | UNC5C | TMEM170A | HTR2B |
| MAP4K3 | LENG8 | ZNF536 | TMEM183A | CALCOCO2 |
| NCS1 | LIN37 | LRRC4 | TMEM192 | DNPEP |
| DFFA | LNP1 | PGBD5 | TMEM216 | IFT20 |
| MAPK6 | LRRC17 | RHD | TMEM238 | RNF152 |
| RPS6KA4 | LRRCC1 | MTHFD2 | TMEM248 | VPS35 |
| RPS6KA5 | LSM10 | NCOA6 | TMEM35A | MRPL3 |
| CDK2AP1 | LSM11 | WTAP | TMEM53 | VPS13C |
| HOXA7 | LTN1 | ITPR2 | TMEM65 | GABARAP |
| PAK2 | LYAR | ACVR2B | TOLLIP | ATG4C |
| TRAF1 | LYRM7 | ALDOB | TOM1 | PIP4K2C |
| MAPKAPK5 | MAP10 | ANKRD2 | TOMM5 | MOCS2 |
| CLTC | MAPRE3 | DPF3 | TPRKB | DNAJC19 |
| MAPK12 | MBOAT1 | ELF5 | TRAPPC2 | KRBA1 |
| TUFM | MCMBP | GNAO1 | TRAPPC2B | MRPL20 |
| LMNB1 | MDM1 | PDGFC | TRAPPC5 | ATP6V0E1 |
| MAP3K3 | MED31 | ACTA2 | TRAPPC6B | ATP6V1B1 |
| PRKCE | MEPCE | AGMAT | TRDN | ATP6V1C2 |
| PKN1 | MIS12 | ALDH3B1 | TRIM6 | ATP6V1E2 |
| MAP3K14 | MIS18A | APH1A | TRMT10B | ATP6V1G1 |
| MAP4K5 | MIS18BP1 | APLP2 | TRMT13 | CARD17 |
| MAP3K10 | MITD1 | C19orf48 | TRPC2 | CPZ |
| MEF2A | MLLT6 | CDH8 | TSEN15 | CYCSP5 |
| NFAT5 | MND1 | CDHR5 | TSPAN17 | DAPL1 |
| LMNB2 | MRPS2 | CISD3 | TSPAN5 | EXOC8 |
| MAP2K3 | MSL1 | CORO6 | TTC39C | FEZ2 |
| MKNK2 | MTCL1 | DAAM2 | TTC9 | FUCA2 |
| MAP3K12 | MZT1 | DEF6 | TTC9B | GAL3ST3 |
| MAP2K6 | NDUFAF6 | ENPP3 | TXNDC16 | HERC1 |
| TANK | NEK9 | HILPDA | UBE2G1 | KLHL11 |
| CASP8AP2 | NLE1 | HIVEP3 | UBE2J1 | KLRF1 |
| TONSL | NPM2 | HOXB3 | UBE2O | LST1 |
| TRADD | NSL1 | HSPB7 | UBE2R2 | MTMR8 |
| CDK11A | NSUN5P2 | LRRFIP1 | UBE2W | NAT16 |
| GAS2 | NT5DC1 | MBNL2 | UBE3D | PARL |
| MAPK11 | NUDC | P3H4 | UBXN6 | PDZD11 |
| SMPD2 | NUDT4 | PDZK1 | UFSP2 | PHF23 |
| MAP3K6 | NUFIP2 | POGLUT3 | UNC80 | PLEKHG2 |
| B4GALNT2 | NUP133 | PYCR1 | UNK | PLXNA4 |
| MAPKAPK3 | NUP160 | RNASEH2A | UPF3A | PM20D1 |
| ALG2 | NUP188 | RNF121 | UTP11 | POLR3A |
| BFAR | NUP50 | RPAIN | UVSSA | PXK |
| NFKBIE | NUP54 | SAG | UXS1 | PYDC1 |
| NFKBIL1 | NUP85 | SARS2 | VAMP4 | RAB33B |
| BORCS8-MEF2B | OBSL1 | SCUBE1 | VPS26B | RALB |
| CD7 | ODF2 | SFMBT1 | VPS37B | RELL1 |
| DEDD2 | OFD1 | SLC4A4 | VSTM2B | RRAGB |
| MAP4K2 | ORC3 | SLC50A1 | VXN | RTF2 |
| MAPK8IP3 | ORC4 | SPAG4 | WASH2P | SCFD1 |
| NSMAF | ORC5 | SPEN | WASHC3 | SLC26A11 |
| RAPGEF2 | OSBPL6 | SPTLC1 | WDR31 | SOGA3 |
| RFFL | OSGIN2 | SRXN1 | WDR33 | SUPT5H |
| MLKL | OTULIN | ST3GAL2 | WDR64 | TBC1D12 |
| RIPK3 | PAK1IP1 | TEC | WDR73 | TBC1D14 |
| TLR3 | PASK | TMEM127 | WDR86 | TMEM59 |
| GLUD1 | PCDHGA5 | TMIGD1 | WDR89 | ULK3 |
| GLUD2 | PCED1A | TRAM1 | WDSUB1 | VPS26A |
| ALOX15 | PCF11 | UBE2QL1 | WFIKKN2 | WDR6 |
| FTH1 | PCID2 | NR1D2 | WFS1 | WDR75 |
| PYG | PET117 | ATG16L2 | WIPI2 | ZDHHC8 |
| CAPN1 | PHOSPHO2 | CREB3L4 | XIRP2 | ZNF416 |
| GLNA | PILRB | OSBPL5 | YARS2 | ZNF554 |
| PPIA | PKIA | RUNDC3A | ZBTB22 | ZNF599 |
| CAPN2 | PLCXD1 | BMPR1B | ZBTB41 | ZNF831 |
| HSP90A | POGLUT2 | CERS4 | ZBTB49 | ARL13B |
| TNFSF6 | POGZ | EIF1 | ZBTB8A | ATG10 |
| TNFRSF6 | POM121C | EPHA4 | ZBTB9 | ATG9A |
| JNK | PPP2R3B | MSRB1 | ZC3H6 | CFTR |
| JAK2 | PPP2R5D | RENBP | ZCCHC14 | CSNK2B |
| CAMK2 | PPP6R3 | TMBIM6 | ZCCHC17 | DYNC1I1 |
| IFNG | PRPF38A | TXNRD3 | ZCCHC3 | FUNDC1 |
| IRF9 | PSMB11 | ALDH1B1 | ZCWPW2 | HBB |
| TRPM7 | PSMB3 | CD302 | ZFAND1 | MFN1 |
| IFNAR1 | PSMC4 | GATA1 | ZFAND2A | MLST8 |
| IFNAR2 | PSMD13 | RBM25 | ZFAND6 | MTERF3 |
| TIRP | PSMD5 | TTLL12 | ZFP14 | MTMR14 |
| IFNA | PSMD6 | ALOXE3 | ZFP92 | MVB12A |
| IFNB | PSME4 | APOA5 | ZFR2 | NBR1 |
| TRIF | PSMF1 | ASB2 | ZFYVE21 | PEX5 |
| VDAC1 | PSMG3 | B3GNT2 | ZGRF1 | PRKAG1 |
| SLC25A4S | PTAR1 | BNIP2 | ZNF235 | PRKAG2 |
| PPID | PYM1 | CACNA1D | ZNF263 | PRKAG3 |
| TRAF5 | QRICH1 | CACNA2D2 | ZNF358 | RPTOR |
| RBCK1 | RAD9B | CLGN | ZNF622 | SLC38A9 |
| JAK1 | RANBP1 | FGD4 | ZNF688 | TOMM22 |
| TYK2 | RASGEF1A | GGPS1 | ZNF700 | TOMM40 |
| STAT2 | RBBP4P1 | GPC5 | ZNF773 | TOMM6 |
| STAT4 | REEP1 | GPR31 | ZNF777 | TOMM7 |
| STAT5A | REEP3 | MYO1C | ZNF81 | TOMM70 |
| H2A | REEP4 | MYO1E | ZNF821 | TUBA1C |
| RNF31 | RGS14 | NOG | ZNF841 | TUBA3C |
| VPS24 | RHEBP1 | NPL | ZP3 | TUBA3D |
| VPS4 | RNASE6 | OR51E2 | ZSCAN29 | TUBA3E |
| CHMP1 | RNF141 | OSBPL10 | ZXDC | TUBA4B |
| CHMP5 | RNF32 | RAC3 | ATG5 | TUBA8 |
| ZBP1 | RPA4 | RASA2 | CALR | TUBB1 |
| FTL | RPS27AP11 | SIGMAR1 | CXCR3 | TUBB2B |
| VDAC2 | RRP1 | STK38 | EIF2AK3 | TUBB8 |
| EIF2AK2 | RSRP1 | XRN1 | IFNA1 | TUBB8B |
| PLA2G4 | SAE1 | ABHD5 | IFNB1 | UBE2V1 |
| DNM1L | SAP30 | ADGRA2 | LY96 | USP30 |
| SPATA2 | SAP30BP | AMOTL1 | NT5E | VPS28 |
| SHARPIN | SBDS | ARHGEF1 | PDIA3 | VPS37D |
| NOX2 | SEC13 | ARMC2 | PRF1 | WDR45B |
| USP21 | SEH1L | ARVCF | ACSM3 | ARHGAP4 |
| ABCB6 | SFI1 | BCAS2 | BRD2 | BHLHE41 |
| ACADM | SGCD | C17orf49 | CDV3 | BMP3 |
| APP | SGO2 | C17orf80 | CKB | CALCA |
| B2M | SKA2P1 | CCDC181 | CST7 | CHRD |
| CCK | SLC17A2 | CFL2 | EBP | CLOCK |
| DECR1 | SLC34A1 | COL6A1 | ERN1 | CSF1 |
| EIF2AK1 | SMC1B | COPB1 | GALT | EFNB2 |
| F3 | SNUPN | DGAT1 | GLP1R | MEPE |
| FLVCR1 | SNX18 | DOHH | INSIG1 | RORB |
| FXN | SNX33 | DUSP10 | ISG15 | RUNX2 |
| HAMP | SPAST | DUSP16 | MS4A1 | SERPINF1 |
| HIF1A | SPICE1 | EAF1 | MXD1 | SMAD5 |
| HMOX2 | SPIN4 | EFEMP2 | MYLIP | SMAD9 |
| KDR | SRGAP2C | ELOVL7 | OSTF1 | SOST |
| LTF | SSNA1 | ENDOD1 | PNO1 | SP7 |
| MT2A | SYNCRIP | EPS8L3 | RNASE2 | TNFRSF11A |
| P2RX7 | SYNE4 | EXO5 | SKAP2 | TNFSF11 |
| PRKN | TAF2 | FBRS | SNRPE | TRAP1 |
| S100A8 | TCERG1 | FKBP7 | SRR | WNT16 |
| SLC11A2 | TEDC1 | FOXB2 | TBC1D8 | ADRA1A |
| SRI | TENT4B | FRG1 | TBXA2R | ATF6 |
| TF | TMCO4 | GALNT4 | VWF | ATG2A |
| TFRC | TMEM138 | GPS2 | RET | AUP1 |
| TSPO | TMEM243 | HES5 | FGFR1 | C9orf72 |
| YWHAE | TNPO2 | HSPBAP1 | CYP2E1 | CDC37 |
| YWHAQ | TOM1L2 | IGHG1 | NME5 | CLEC16A |
| SLC39A6 | TPRA1 | IRX4 | ABCA5 | CPTP |
| DCN | TRIM73 | KCNK2 | CAPZB | DDRGK1 |
| MMUT | TRMT2A | KIF3A | EPHB4 | DEPDC5 |
| SFXN1 | TSPEAR-AS2 | KLF13 | AIMP2 | DEPP1 |
| BNIP3 | TTC14 | LIMK2 | ARR3 | DHRSX |
| ATP7B | TTC31 | LMTK2 | DCTN4 | EIF4G1 |
| YWHAZ | TTC38 | LPCAT1 | DOCK1 | EIF4G2 |
| GCLM | TTLL7 | LPXN | HNRNPM | ELAPOR1 |
| HYAL2 | TUBBP2 | LRIG3 | LGALS1 | FOXK1 |
| CP | TUBD1 | LRRC58 | PCGF2 | GPR137 |
| BBC3 | TUBG2 | LSM1 | PEA15 | GPSM1 |
| ABCG2 | TUBGCP2 | MAN2C1 | PSIP1 | HUWE1 |
| ANXA6 | TUBGCP4 | MEAF6 | RECQL | IL10RA |
| BCAP31 | TUBGCP6 | MLH3 | TMSB15A | KLHL3 |
| EPAS1 | TULP4 | MYH11 | WNK1 | LACRT |
| NGFR | TXNL4A | MYH6 | XRCC4 | MAPK15 |
| NOL3 | TYSND1 | NR2C1 | DMBT1 | MIR199A1 |
| SLC22A17 | UBL3 | NR6A1 | ACTR2 | MIRLET7B |
| SLC9A1 | USP53 | NUMBL | BCAT2 | MTMR4 |
| TMPRSS6 | VPS25 | PARM1 | CCL15 | ORMDL3 |
| FIS1 | VPS37C | PDK4 | HSPA9 | OSBPL7 |
| ALOX12 | VPS72 | PICK1 | LINC00312 | PIK3C2A |
| LRRK2 | WDR81 | POLR3G | MMRN1 | POLDIP2 |
| DYNLL1 | WDR90 | PRKAR2A | MR1 | PRKD1 |
| TP53BP2 | ZBED5 | PRUNE2 | REG3A | RAB39B |
| ECHS1 | ZC3HC1 | PTP4A2 | RPL29 | RETREG1 |
| PCCA | ZNF141 | PTPRS | THRA | RETREG3 |
| FBXL5 | ZNF207 | QSOX1 | UNC5B | RMC1 |
| GDF2 | ZNF414 | RGS17 | A1CF | RUFY4 |
| HFE | ZNF587 | RNF41 | APOLD1 | SEC22B |
| MELTF | ZNF655 | RNF7 | MCM3AP | SESN1 |
| MT3 | ZNF830 | ROM1 | NNT | SESN2 |
| NAIF1 | ZNF852 | RPL22L1 | PAQR4 | SESN3 |
| NEO1 | ZNF98 | SAP30L | KANK1 | SMCR8 |
| PRNP | ZPBP | SLC30A6 | ACYP2 | SMG1 |
| SCO2 | ACP5 | SLC35A2 | CAMKK2 | STUB1 |
| SLC25A37 | ARSB | SNORD7 | CANX | SYNPO2 |
| TGM2 | ATP6V0C | SRCAP | CLEC1B | TEX264 |
| COMMD1 | CD68 | SRD5A3 | CPT1A | TMEM150B |
| MICU1 | CLTA | SWAP70 | DCLRE1C | TMEM150C |
| THEM4 | CTSB | TBATA | DESI1 | TMEM39B |
| TMC8 | CTSC | TMEM41B | MFN2 | TREM2 |
| BTBD9 | CTSF | TRIM11 | MYCT1 | TRIM27 |
| HJV | CTSK | TRIP4 | NDRG3 | TRIM34 |
| ACADL | CTSL | VPS36 | SDAD1 | TRIM38 |
| SLC30A7 | GALNS | YIPF6 | SNHG3 | TRIM5 |
| YWHAG | GLA | ZMYND8 | TNFRSF14 | TRIM68 |
| BMF | GLB1 | RGS8 | UPF1 | TRIML1 |
| BMP6 | GUSB | CNTNAP4 | YPEL1 | TRIML2 |
| EYA2 | HGS | BPIFA1 | FAM30A | UFC1 |
| SCARA5 | IGF2R | CHPF | MPG | UFL1 |
| SLC39A5 | KIT | CBLB | MAP7 | VPS13D |
| CAMK2A | LAMP3 | BCAS3 | CLDN10 | WASHC1 |
| MLLT11 | LAT | DNAJC5 | ACACB | WDR24 |
| RTL10 | MAP6 | APOA4 | RPL14 | WDR41 |
| PPP1R13B | MCOLN1 | CRLF1 | SRPK2 | ZMPSTE24 |
| SLC39A10 | NAPSA | AGRN | RHOBTB1 | ABO |
| STEAP3 | NEU1 | DCSTAMP | LAMTOR2 | AMH |
| DYNLL2 | NPC1 | ADAT2 | ZNF248 | COMP |
| RHAG | NPC2 | GABRB2 | GAS7 | KRT18 |
| STEAP1 | PCSK9 | HSDL2 | TPM4 | NOS3 |
| YWHAH | PIK3CG | MYO1G | ADAMTS12 | NTRK1 |
| SLC39A4 | PLA2G15 | PGM1 | ARFRP1 | PLA1A |
| HADHA | SGSH | UBAC2 | CAPN3 | PLA2G1B |
| HADHB | SLURP1 | ACOT9 | COL2A1 | PLA2G2A |
| IMMT | VPS51 | SLC6A14 | FLII | PLA2G5 |
| IREB2 | CDX2 | TULP3 | ITGA4 | PLA2G6 |
| RAP1GDS1 | CHGA | UBL4A | EEF1D | SERPINF2 |
| SLC30A1 | HDAC6 | CTPS1 | HEATR3 | ZFYVE9 |
| SLC30A4 | CORO1A | ICMT | ZMYM4 | LEFTY1 |
| SLC31A1 | VAMP8 | LTB4R | NUDT6 | LSR |
| STEAP2 | ADRB2 | ARPC4 | MTHFS | IL1RAP |
| STEAP4 | RASGRP1 | ENTPD2 | RRBP1 | PITX2 |
| TTC7A | ARRB1 | ENTPD8 | F13A1 | SATB1 |
| SLC8B1 | AP1S3 | ERO1B | MAGT1 | TNFRSF10D |
| ACADS | ARSA | KCNJ11 | ALOX5AP | BMP8A |
| ACO1 | CTSS | MSTO1 | DNASE1L1 | BMPR1A |
| ATP2C1 | IDUA | PIP5K1B | EFNA5 | GDF5 |
| DISC1 | LAPTM4B | RABIF | FBXL4 | FST |
| SLC46A1 | NEDD4 | ANO9 | ICA1 | BMP8B |
| ECI1 | PRICKLE1 | ANXA8L1 | LPIN2 | NODAL |
| MTCH2 | ASAH1 | B3GALT5 | MYO9B | PXN |
| SLC39A7 | CD63 | BICD1 | VGF | SUFU |
| ALAS2 | FUCA1 | C16orf74 | ZNF32 | THBS3 |
| HPX | SORT1 | C1GALT1C1 | PAFAH1B2 | THBS4 |
| TFR2 | UBE2Z | C9 | BPHL | TNFRSF10C |
| ACAA2 | USE1 | CEP85L | USP34 | ACVRL1 |
| ISCU | NR4A3 | CTRC | TAX1BP1 | JMJD7-PLA2G4B |
| MCUR1 | CTSE | GCNT3 | SGSM2 | PLA2G4B |
| NDFIP1 | AGA | GRIA3 | ANK1 | ACVR1C |
| SLC39A14 | CLTB | KCMF1 | DHX29 | PRKX |
| PCCB | CTSZ | KIFAP3 | FAM13A | GHRL |
| NUBP1 | LGMN | LFNG | MTERF1 | FGF6 |
| SLC39A8 | NAGLU | MACROD1 | PPIP5K1 | GDF7 |
| FTHL17 | PSAP | MOB4 | NUDT2 | IRAK4 |
| HEBP2 | TXNDC5 | NCSTN | SUN1 | PLA2G10 |
| HADH | CD81 | NECTIN3 | ASF1A | USP25 |
| PPP3CC | LYN | NKD1 | EFCAB2 | PRKACG |
| ABCB7 | RAB12 | PAPOLA | EIF3M | AMHR2 |
| SLC40A1 | RAB14 | PRPF40A | PLEKHA8P1 | INHBC |
| PPP3R1 | SYT7 | RGS16 | RPL28 | IRAK2 |
| HEPH | VPS52 | SEMA3D | ZNF91 | NANOS3 |
| IFI6 | S100A13 | SH3D21 | AHDC1 | NAA80 |
| MCU | SLC17A5 | SLC32A1 | LONP2 | CD244 |
| YWHAB | CTSH | SLCO3A1 | PGLS | IRAK3 |
| MCUB | HYAL1 | SNHG9 | COL8A2 | LEFTY2 |
| CUTC | LAMP1 | TCEA3 | EIF5B | SHC2 |
| ATP2A1 | VAMP7 | CBR4 | FKBP11 | CWC27 |
| MCEE | CD164 | MYO3A | GIMAP5 | FLRT1 |
| ACADVL | LIPA | WNK4 | PSG9 | GDF6 |
| BLOC1S2 | LAMP2 | AATK | RPS3A | GLRX2 |
| CCDC22 | HOOK2 | MRPS22 | SUMO3 | INHBE |
| EPB42 | LAMTOR5 | DPH1 | TOR1AIP1 | KCNMB1 |
| ERFE | RNF128 | DPP8 | TRIM52 | MYLPF |
| FTH1P19 | ATP6V0D1 | PDZRN3 | ATP8B1 | OAZ3 |
| FTMT | TGFBRAP1 | PHF19 | HTR4 | PLA2G12A |
| HSH2D | SRPX | PSD3 | RPL18 | PLA2G12B |
| MICU2 | ABCA2 | EPC1 | ZNF177 | PLA2G2C |
| MYOC | M6PR | FBXL22 | AOC1 | PLA2G2F |
| PICALM | CTSG | CPA1 | TAC3 | PLA2G4E |
| PPP2R3C | AP1M2 | FKBPL | PURA | PRKAR1B |
| PRND | CLN3 | SLC20A1 | GSTM4 | PSMA6P4 |
| RHOT1 | SPNS1 | CCNT1 | WDR45 | PSMC1P4 |
| RHOT2 | PPT1 | ALDH3A2 | ZNF492 | SAP18 |
| SCO1 | SCARB2 | DOK4 | GLTP | SH2D2A |
| SFXN2 | HOOK3 | PUM1 | LYRM2 | ANKRD13C |
| SFXN3 | VPS53 | SIK3 | PIGN | BRMS1 |
| SFXN4 | LAT2 | CD93 | RPAP1 | CEACAM5 |
| SFXN5 | CCL14 | CHODL | RPL27A | CEACAM6 |
| SLC25A28 | RAB20 | CMYA5 | SCYL3 | MYBBP1A |
| SLC30A8 | SLC7A8 | KIF16B | TRAF3IP3 | TLE5 |
| SLC39A12 | ABCB9 | LECT2 | ZNF232 | ZNF304 |
| SLC39A13 | DNASE2 | PDIA2 | ZNF43 | ADORA2A |
| SLC8A3 | LAMTOR1 | PNOC | ZHX3 | AGT |
| SMDT1 | TMEM106B | RNF187 | PRRC2C | AGTR2 |
| AAAS | CTSV | YKT6 | MRPL23 | AR |
| ABCB1 | ATG14 | ASPA | SPATA7 | ARL6IP5 |
| ABCC2 | VPS33B | ATG3 | ZNF318 | ARRB2 |
| AHI1 | TRAK1 | ATP6V1E1 | MS4A2 | ASAH2 |
| AKAP13 | ARSG | ATP8A1 | SECISBP2L | ATAD5 |
| AOC3 | VPS39 | ATXN7 | ZNF93 | ATP5IF1 |
| APC | MTM1 | CBLC | ZNF614 | AVP |
| APEX2 | PLA2G3 | CNKSR3 | BTD | BCL2L14 |
| ASIP | VPS41 | COMMD9 | CELSR2 | BDKRB2 |
| ASXL1 | AKTIP | DISP1 | DBR1 | BIK |
| BMP2 | RAB39A | DLG3 | ECPAS | C8orf44-SGK3 |
| CADM1 | SNAP23 | DNTTIP1 | EDAR | CAAP1 |
| CALD1 | SNAPIN | DTX3 | GRK4 | CASP12 |
| CCDC88A | GBA | DUT | SLC24A3 | CD5 |
| CD28 | GGA2 | EPG5 | ZFYVE26 | CD70 |
| CD2AP | TCIRG1 | FBLN5 | ZNF142 | CHCHD10 |
| CDC42 | TPP1 | FBXL3 | SUPT7L | COA8 |
| CDCA7L | EHD3 | FBXO17 | GPR12 | CREB3 |
| CDK4 | RAB34 | FBXO6 | DCUN1D2 | CREB3L1 |
| CDK7 | VPS54 | FDX1 | EML3 | CX3CR1 |
| CDK9 | AP1M1 | IGKC | FBXO9 | DAB2IP |
| CDKN3 | BECN2 | KCTD20 | LMBR1L | DAP3 |
| CEP250 | CTSA | MSRA | MED22 | DBH |
| CFD | SNX27 | MT4 | MID2 | DDX47 |
| CFH | ATP6V0D2 | NCALD | UGGT2 | DELE1 |
| CIITA | ATP6AP1 | NIT1 | ZC2HC1A | DIDO1 |
| CIT | IDS | NME4 | ZNF394 | DPF2 |
| CSNK2A1 | ATP6V0A4 | OGN | ZNF473 | EDA2R |
| CSNK2A2 | GNPTAB | PCDHB13 | AOAH | EIF5A |
| CTNNB1 | AP3B1 | RALGPS2 | ARIH2 | ENO1 |
| CWC15 | MANBA | RHOV | ATPAF2 | EPO |
| DAPK3 | VPS18 | RNF111 | C1orf50 | ERBB3 |
| DNMT3A | KIF13A | RNF38 | C1orf54 | ERP29 |
| DR1 | MYO7A | RPLP0 | C6orf62 | FAIM |
| DSP | LAPTM5 | SERINC1 | CLASRP | FAM162A |
| DUSP4 | VAMP2 | SHQ1 | CLCN7 | FGB |
| ECD | ATP6V0A2 | SIVA1 | CMAHP | FGFR3 |
| EDN1 | CTSO | SNAI3 | CPA2 | FGG |
| EDN3 | SUMF1 | STXBP5 | DALRD3 | FHIT |
| EIF4EBP1 | MGRN1 | TBC1D7 | DAO | FIGNL1 |
| EMP1 | VPS11 | TIAM2 | DCAF10 | GFRAL |
| ERCC2 | GAA | TM4SF4 | DNAJC16 | GHITM |
| EZH2 | GCC2 | TRMO | DSTNP2 | GNAI2 |
| FAP | SCYL2 | TRMT11 | ENPP4 | GPER1 |
| GADD45B | AP3M2 | USP27X | FAM89B | GPX1 |
| GDF15 | AP3S2 | YAF2 | GID4 | GRINA |
| GEN1 | CLN5 | ZNF264 | GOSR2 | GSKIP |
| GOT1 | CTNS | UQCRC2 | GPR153 | HIP1 |
| GPNMB | NAGA | NPDC1 | HLA-F-AS1 | HIP1R |
| GRK6 | GPRASP1 | SYN2 | HMGB3P1 | HRK |
| GSK3B | VPS33A | ALDH5A1 | HYI | HYOU1 |
| HDAC2 | ACP2 | CELSR1 | IQCK | IFI27 |
| HLA-DOA | AP1B1 | OLIG2 | IRGQ | IFI27L1 |
| HMGCR | AP1S1 | NOSIP | KCTD15 | IFI27L2 |
| HNF4A | AP3M1 | UBE2L6 | KIZ | IL12A |
| HSP90AA1 | AP3S1 | CA13 | KLHL20 | IL19 |
| IDO1 | AP4E1 | CD79A | KLHL5 | IL20RA |
| IFIT1 | AP4M1 | COX7B2 | MAGOH2P | IL7 |
| IFIT2 | AP4S1 | MLYCD | MED14 | ING5 |
| INS | ATP6V1H | PLCD3 | MFSD11 | ITGAM |
| IVNS1ABP | BLOC1S1 | PLSCR1 | MTMR12 | ITGAV |
| JTB | CTSW | RAET1E | MXD4 | ITM2C |
| KDM5B | DNASE2B | SGSM1 | MYO15B | ITPRIP |
| KRAS | ENTPD4 | CRTC3 | NT5M | JMY |
| LNPK | GGA1 | LTBP1 | NUDT3 | LGALS12 |
| MCIDAS | GNPTG | SULT4A1 | OR1F1 | LTBR |
| MKI67 | GNS | LMAN1 | ORAI2 | MAGEA3 |
| MNAT1 | HEXA | PRDM4 | PAM16 | MAGED1 |
| MNT | HGSNAT | CACNA1G | PCIF1 | MAL |
| MYCBP2 | LAPTM4A | DTX3L | PEX1 | MARCHF7 |
| NBPF10 | MAN2B1 | VAC14 | PNPLA4 | MAZ |
| NCAPG2 | MFSD8 | GPR65 | PTH2R | MEIS3 |
| NFE2L2 | NAGPA | NTM | RAB4A | METTL21C |
| NFIA | PPT2 | ALKBH8 | RANBP17 | MFF |
| NINL | CPLX2 | B4GAT1 | RC3H2 | MIR132 |
| NOS1 | ANKFY1 | CMC2 | REX1BD | MIR16-1 |
| NPAT | DENND3 | CTU1 | RPL10L | MIR17 |
| NR3C1 | HMGXB4 | KLHDC10 | RPL18A | MIR186 |
| NUP35 | IFT46 | LBX1 | RPL23AP32 | MIR198 |
| NUSAP1 | LAMTOR4 | METTL6 | RPL7 | MIR21 |
| PAFAH1B1 | LYST | NDUFS3 | RPS28 | MIR210 |
| PANK2 | MILR1 | RMND1 | SCMH1 | MIR221 |
| PDGFB | MRGPRX2 | RNF115 | SDHAF1 | MIR222 |
| PHB2 | MTCH1 | SLC10A6 | SEL1L3 | MIR26B |
| PLAU | NAT8 | UBLCP1 | SLC35A3 | MIR27B |
| POC1A | PCDHGA3 | AMOTL2 | SLC49A3 | MIR449A |
| PPP1CA | PSAPL1 | ATXN3 | SMG7 | MMP9 |
| PPP1R10 | RBSN | DHCR7 | SUPT6H | MUL1 |
| PRCC | RILP | IPP | SYNE3 | NDUFA13 |
| PSMB5 | SCGB1D1 | DGKE | TAF12 | NF1 |
| PSMB7 | SNX16 | ACAN | TAF1A | NOC2L |
| PSMD1 | SPTBN5 | FMO5 | TBC1D9B | NONO |
| PSMD2 | STX8 | SRPRB | THAP4 | NR4A2 |
| PSMD8 | TMEM175 | ACAD8 | TMCO6 | NRP1 |
| PSME3 | VIPAS39 | ACTRT3 | TMEM120B | OPA1 |
| PTEN | VPS16 | ARHGAP17 | TMEM134 | PDCD6 |
| PTPA | WASH3P | ASCC2 | TMEM254 | PDK2 |
| PTPN11 | ZFYVE16 | BICC1 | TMPRSS15 | PDX1 |
| PTPN6 | ADGRE2 | BOC | TOGARAM1 | PELI3 |
| RAB11A | ARL8B | BVES | TSR1 | PERP |
| RAB1A | ATP10B | CBLN2 | TUBAL3 | PF4 |
| RERE | ATP13A2 | CCNDBP1 | TWF2 | PIH1D1 |
| RNPC3 | BLK | CLUAP1 | UBE2D4 | POU4F1 |
| RRM2 | BORCS5 | CYFIP2 | UBFD1 | POU4F2 |
| RUNX1 | BORCS6 | DDHD1 | UTP20 | PRELID1 |
| SDC1 | C12orf4 | ECT2L | WIZ | PRKRA |
| SDCBP | CBL | EIF3G | ZCCHC24 | PRODH |
| SERTAD2 | CD300A | HNRNPLL | ZDHHC18 | PTGIS |
| SH2B1 | CLNK | LAMA5 | ZNF117 | PTPN1 |
| SIK1 | DEF8 | MALL | ZNF133 | PTTG1IP |
| SINHCAF | FAM98A | MBP | ZNF137P | QARS1 |
| SIRT2 | FES | MS4A12 | ZNF16 | RNF183 |
| SIRT7 | FGR | MYO1A | ZNF250 | RNF186 |
| SMARCB1 | FLCN | NLRP5 | ZNF33B | RNF34 |
| SMC2 | FOXF1 | PDE4B | ZNF451 | RPL11 |
| SPAG5 | GAB2 | PRKG2 | ZNF571 | RPL26 |
| SRF | HPS6 | PTPRM | ZNF589 | RPS7 |
| STIL | IL13 | REEP6 | ZNF669 | RRM2B |
| STK26 | IL13RA2 | RPE | ZNF74 | RRN3 |
| TIMP1 | KIF1B | RYR3 | RPL8 | RRP8 |
| TLE3 | KXD1 | SASS6 | ATP5MC3 | RTKN2 |
| TXNRD1 | LGALS9 | SGMS2 | CS | SCG2 |
| TYMS | MAP1LC3A | SMOC2 | ACSF2 | SCN2A |
| UBXN11 | MYH9 | TADA2A | NOX1 | SCRT2 |
| UNG | NCOA4 | TEKT5 | NOX3 | SELENOK |
| UQCC1 | PIK3C3 | TMBIM1 | NOX4 | SELENOS |
| USP13 | PIP4K2A | UTP23 | NOX5 | SENP1 |
| XPO1 | PIP4K2B | WHRN | DUOX1 | SEPTIN4 |
| ZBTB17 | PIP4P1 | KLC4 | DUOX2 | SGK3 |
| KIF20B | PLEKHM1 | LHFPL4 | PGD | SGMS1 |
| KPNA2 | PLEKHM2 | B4GALT3 | FLT3 | SGPP1 |
| SPRY2 | PTGDR | CCDC3 | SCP2 | SH3RF1 |
| INTS13 | PTGDS | EMC6 | LPCAT3 | SHH |
| NES | RAC2 | ITPKC | SLC1A5 | SIAH2 |
| SLC22A3 | RUBCNL | LRRC8E | GLS2 | SLC25A31 |
| UVRAG | SNX4 | SNCB | CARS1 | SLC25A4 |
| CDKN1C | SPAG9 | ST6GALNAC5 | ALOX12B | SLC25A5 |
| INSR | SPHK2 | TCL1A | ALOX15B | SLC25A6 |
| DCTN6 | STXBP1 | IRX2 | PHKG2 | SLC35F6 |
| IGF2 | STXBP2 | SH3PXD2A | ATG4D | SPI1 |
| INSM1 | SYTL4 | UHMK1 | GABARAPL2 | SSTR3 |
| MEN1 | TFEB | TOR4A | GABARAPL1 | STK25 |
| PSMD9 | UNC13D | APCS | ATG16L1 | STRADB |
| TICAM2 | ABHD6 | ABCB11 | WIPI1 | STYXL1 |
| MCM2 | ACCS | GLOD4 | ATG13 | SYVN1 |
| CDK6 | ACE2 | OXCT1 | ULK2 | TERT |
| LRIG1 | ACSS2 | SLC25A12 | ZEB1 | TFPT |
| MCM7 | ADGRL4 | LPAR6 | DPP4 | TIMM50 |
| TGFA | ADIPOQ | PLCB2 | PEBP1 | TIMP3 |
| BIRC5 | ADM | BCL2L13 | SOCS1 | TM2D1 |
| RACGAP1 | AHR | C2 | CDO1 | TMEM102 |
| POLE | AHSG | CACNA1S | CHAC1 | TMEM117 |
| SMAD2 | AICDA | FRMD5 | LINC00472 | TRAF7 |
| XRCC2 | AKR1C1 | GLIPR2 | PRKAA2 | TRIM39 |
| PPP2R1A | AKT1S1 | GNPAT | PRKAA1 | TYROBP |
| BARD1 | ANGPT2 | GOSR1 | ELAVL1 | UBE4B |
| INHBA | ANGPTL2 | GUCD1 | MIR6852 | UMOD |
| HSPA8 | ANGPTL4 | HSF4 | ANO6 | URI1 |
| RHOU | ANPEP | KCTD10 | YY1AP1 | VNN1 |
| SMAD3 | ANXA13 | LDB2 | EGLN2 | WNT4 |
| XRCC3 | AOX1 | MYL12A | MIOX | ZMYND11 |
| BUB1B | ARIH1 | NCAN | TAFAZZIN | ZNF205 |
| CDC20 | ARNTL | NPAS1 | MTDH | ZNF385B |
| MAD2L1 | ARPP21 | NRBP2 | IDH1 | ZSWIM2 |
| MCM10 | ASL | SENP7 | FBXW7 | CD14 |
| CCNE1 | ASPRV1 | SH2D4A | PANX1 | CRH |
| HDAC1 | ASPSCR1 | SLC46A3 | CD82 | DCC |
| HSPA2 | ATP6AP2 | XPOT | CYB5R1 | INCA1 |
| NCOA3 | B3GALNT1 | MPV17L | NR1D1 | WDR35 |
| SKP2 | BCAR3 | ABCB4 | USP7 | CA9 |
| STAG2 | BCL10 | ACADSB | ATF4 | NFKB1A |

**Supplementary Table 3** RCD-related differentially DEGs.

| id | logFC | AveExpr | t | P.Value | adj.P.Val | B |
| --- | --- | --- | --- | --- | --- | --- |
| HGS | -0.641572814 | 8.732231462 | -5.123151828 | 1.17E-06 | 0.001069845 | 5.210501802 |
| CDO1 | 0.646740794 | 7.594248043 | 4.987171307 | 2.10E-06 | 0.001069845 | 4.674132723 |
| GPI | -0.640154358 | 9.806619966 | -4.871699228 | 3.43E-06 | 0.001238588 | 4.225872433 |
| CASP1 | 0.726606586 | 8.103282419 | 4.835983725 | 3.98E-06 | 0.001328944 | 4.088601479 |
| DLGAP4 | -0.761609108 | 7.423082017 | -4.634393578 | 9.20E-06 | 0.00249249 | 3.326363186 |
| UBA1 | -0.69103465 | 9.385330026 | -4.579103761 | 1.15E-05 | 0.00293952 | 3.121128049 |
| CRIP2 | -0.836088786 | 9.030201598 | -4.485890311 | 1.68E-05 | 0.003398132 | 2.778954613 |
| STXBP2 | -0.748674742 | 5.740201718 | -4.343190786 | 2.96E-05 | 0.004488778 | 2.264667014 |
| TGFB1I1 | -0.715250256 | 8.749719692 | -4.305982971 | 3.42E-05 | 0.004724022 | 2.132508583 |
| AKR1C3 | 1.128627436 | 10.25367879 | 4.26231604 | 4.06E-05 | 0.005177717 | 1.97844812 |
| DOK4 | -0.62095935 | 6.127533786 | -4.198122026 | 5.20E-05 | 0.005784778 | 1.754028025 |
| LDB2 | 0.676196247 | 9.734978855 | 4.147638313 | 6.31E-05 | 0.00628258 | 1.579282775 |
| QSOX1 | -0.806191308 | 8.078649573 | -4.11200852 | 7.23E-05 | 0.00642732 | 1.456887713 |
| USP11 | -0.670621708 | 8.657733171 | -4.108253988 | 7.33E-05 | 0.00642732 | 1.444035522 |
| EIF6 | -0.603080369 | 9.17868647 | -3.895779437 | 0.000161824 | 0.010169104 | 0.731052012 |
| TPM4 | -0.625218711 | 9.601130376 | -3.793722231 | 0.000234302 | 0.01152031 | 0.39883176 |
| CYB5R1 | -0.698253742 | 8.012888077 | -3.781929566 | 0.000244435 | 0.01152031 | 0.360881939 |
| ACOX2 | 0.6087667 | 9.453034427 | 3.772989586 | 0.000252392 | 0.011547738 | 0.332173279 |
| RP2 | -0.606162861 | 6.965491521 | -3.650646017 | 0.000389221 | 0.014424458 | -0.055370887 |
| CRIP1 | -0.749209753 | 8.146942222 | -3.616861481 | 0.000437918 | 0.015783798 | -0.16061878 |
| VAMP2 | -0.652617489 | 7.737005274 | -3.582131731 | 0.000493946 | 0.017133992 | -0.268002843 |
| EPHA2 | -0.736061722 | 7.069989393 | -3.549706965 | 0.000552307 | 0.017871655 | -0.367515429 |
| LY96 | 0.674589136 | 8.093487068 | 3.514602267 | 0.000622795 | 0.019017169 | -0.474437101 |
| PPL | 0.623315336 | 8.885945043 | 3.506240054 | 0.000640793 | 0.019218099 | -0.499781024 |
| MYH11 | -0.594272658 | 7.597957496 | -3.423874331 | 0.000846232 | 0.0225108 | -0.746809007 |
| NTRK2 | 0.621609956 | 8.125396308 | 3.417475532 | 0.000864545 | 0.022582342 | -0.765800993 |
| IFITM1 | 0.610955717 | 9.783578718 | 3.40504013 | 0.000901205 | 0.023398959 | -0.802627376 |
| TRIM28 | -0.677297311 | 8.22568459 | -3.392066822 | 0.000941003 | 0.023669765 | -0.840930286 |
| C5 | 0.602208739 | 9.051459496 | 3.365601752 | 0.001027352 | 0.024475823 | -0.918697005 |
| RHOB | -0.709858919 | 8.517236658 | -3.355966805 | 0.001060593 | 0.02459214 | -0.946885379 |
| THBD | -0.850797836 | 5.644380632 | -3.320964248 | 0.00119002 | 0.025943672 | -1.048732712 |
| FGF7 | 0.7615306 | 7.295558274 | 3.278743366 | 0.001365782 | 0.0279341 | -1.170414014 |
| FBLN2 | 0.634718275 | 9.606094427 | 3.221261482 | 0.001644239 | 0.030923981 | -1.334006499 |
| TNFSF4 | -0.827054186 | 5.369906111 | -3.131404544 | 0.002187322 | 0.034363146 | -1.584901455 |
| CRYAB | -0.625192694 | 9.49136941 | -2.917658122 | 0.004213904 | 0.049208935 | -2.157535824 |

**Supplementary Table 4** The33 overlapping genes of the tan module, RCD genes, and DEGs between glaucoma patients and controls

| PLEC | EIF4G1 | GPI | MINK1 | DLGAP4 |
| --- | --- | --- | --- | --- |
| P4HB | STXBP2 | DOK4 | QSOX1 | PPP1CA |
| PPP2R1A | ACTR1A | RHBDF1 | ATP6V0C | TPM4 |
| GNB1 | VAMP2 | SFXN3 | FADS3 | RHOB |
| IQGAP1 | HSF1 | RFNG | TIMM44 | LIMK1 |
| GSN | TUBB3 | RANGAP1 | TOM1L2 | ASCC2 |
| BAP1 | MAP3K5 | NT5E |  |  |
